# Supplementary material
Source: PubMed Central journal article supplement (PMC4687849)

## Supporting Information:

### Synthesis of Ethers via Reaction of Carbanions and Monoperoxyacetals

ShivaKumar Kyasa, Rebecca N. Meier, Ruth A. Pardini, Tristan K. Truttman, Keith T. Kuwata, and Patrick H. Dussault\*

\*Corresponding author: [pdussault1@unl.edu](mailto:pdussault1@unl.edu)

#### Table of Contents

##### Optimized Coordinates and Energies for Calculated Structures in Scheme 5

|                                  | R = t-Bu, M = Li | R = THP, M = Li | R = t-Bu, M = Na | R = THP, M = Na |
|----------------------------------|------------------|-----------------|------------------|-----------------|
| ROOCH <sub>3</sub>               | page 5           | Page 9          | Page 13          | Page 17         |
| CH <sub>3</sub> M                | page 5           | Page 9          | Page 14          | Page 18         |
| Intermediate II                  | page 6           | Page 10         | Page 14          | Page 18         |
| TS III                           | page 6           | Page 11         | Page 15          | Page 19         |
| Intermediate IV                  | page 7           | Page 11         | Page 16          | Page 20         |
| ROM                              | page 8           | Page 12         | Page 16          | Page 21         |
| CH <sub>3</sub> OCH <sub>3</sub> | Page 8           | Page 13         | Page 17          | Page 21         |

##### Thermal analyses (DSC/TGA)

2-(10-Phenyldecylperoxy) tetrahydro-2H-pyran (**10b**) 22

10-(*tert*-Butylperoxy)decylbenzene (**10a**) 23

##### NMR spectra: hydroperoxides

2-Tetrahydropyranyl OOH (**2**) (<sup>1</sup>H and <sup>13</sup>C) 24

2-Methoxyprop-2-yl OOH (**3**) (<sup>1</sup>H and <sup>13</sup>C) 25

dimethyloctenyl OOH (**4**) (<sup>1</sup>H and <sup>13</sup>C) 26

1-methylhydroperoxide (**5**) (<sup>1</sup>H and <sup>13</sup>C) 27

3-Phenylpropyl hydroperoxide (**6**) (<sup>1</sup>H and <sup>13</sup>C) 28

3-Phenylpropyl hydroperoxide (**7**) (<sup>1</sup>H and <sup>13</sup>C) 29

##### NMR spectra: peroxides and peroxyacetals

8-(*tert*-Butylperoxy)-2,6-dimethyloct-2-ene (**8a**) (<sup>1</sup>H and <sup>13</sup>C) 30

2-(3,7-Dimethyloct-6-ene-1-yl)peroxy-tetrahydro-2H-pyran (**8b**): (<sup>1</sup>H and <sup>13</sup>C) 31

8-((2-Methoxypropan-2-yl) peroxy)-2,6-dimethyloct-2-ene (**8c**): (<sup>1</sup>H and <sup>13</sup>C) 32

|                                                                                                                     |    |
|---------------------------------------------------------------------------------------------------------------------|----|
| <i>t</i> -Butyldimethylsilyl 3,7-dimethyl-6-octenyl peroxide ( <b>8d</b> ): ( <sup>1</sup> H and <sup>13</sup> C)   | 33 |
| 3- <i>tert</i> -Butylperoxypropyl benzene ( <b>9a</b> ) ( <sup>1</sup> H and <sup>13</sup> C)                       | 34 |
| 2-(3-Phenylpropylperoxy)tetrahydro-2H-pyran ( <b>9b</b> ) ( <sup>1</sup> H and <sup>13</sup> C)                     | 35 |
| 3-(2-Methoxyethylperoxy)propyl benzene ( <b>9e</b> ): ( <sup>1</sup> H and <sup>13</sup> C)                         | 36 |
| 10-( <i>tert</i> -Butylperoxy)decylbenzene ( <b>10a</b> ): ( <sup>1</sup> H and <sup>13</sup> C)                    | 37 |
| 2-(10-Phenyldecylperoxy) tetrahydro-2H-pyran ( <b>10b</b> ) ( <sup>1</sup> H and <sup>13</sup> C)                   | 38 |
| <i>t</i> -Butyldimethylsilyl 10-phenyldecyl peroxide ( <b>10d</b> ): ( <sup>1</sup> H and <sup>13</sup> C)          | 39 |
| <i>tert</i> -Butylperoxy octane ( <b>11a</b> ) ( <sup>1</sup> H and <sup>13</sup> C)                                | 40 |
| 2-(Decylperoxy)-tetrahydro-2H-pyran ( <b>12b</b> ) ( <sup>1</sup> H and <sup>13</sup> C)                            | 41 |
| 2-(2-Octylperoxy)-tetrahydro-2H-pyran ( <b>13b</b> ) ( <sup>1</sup> H and <sup>13</sup> C)                          | 42 |
| 2-(1-Methylcyclohexylperoxy)-tetrahydro-2H-pyran ( <b>15b</b> ) ( <sup>1</sup> H and <sup>13</sup> C)               | 43 |
| <i>bis</i> -(Tetrahydro-2H-pyranyl) peroxide ( <b>14b</b> ) ( <sup>1</sup> H and <sup>13</sup> C)                   | 44 |
| ( <i>E,Z</i> )-2-(Undec-2-en-1-yl peroxy) tetrahydro-2H-pyran ( <b>16b</b> ): ( <sup>1</sup> H and <sup>13</sup> C) | 45 |

#### Ethers:

|                                                                                                   |    |
|---------------------------------------------------------------------------------------------------|----|
| 8-Butoxy-2,6-dimethyloct-2-ene ( <b>17a</b> ) ( <sup>1</sup> H and <sup>13</sup> C)               | 46 |
| 8-Hexyloxy-2,6-dimethyl-2-octene ( <b>17b</b> ): ( <sup>1</sup> H and <sup>13</sup> C)            | 47 |
| 8-Allyloxy-2,6-dimethyloct-2-ene ( <b>17c</b> ) ( <sup>1</sup> H and <sup>13</sup> C)             | 48 |
| 8- <i>tert</i> -Butoxy-2,6-dimethyl-2-octene ( <b>17d</b> ) ( <sup>1</sup> H and <sup>13</sup> C) | 49 |
| 3-Phenylpropyl trimethylsilylmethyl ether ( <b>17e</b> ): ( <sup>1</sup> H and <sup>13</sup> C)   | 50 |
| 2-Butoxy octane ( <b>17f</b> ) ( <sup>1</sup> H and <sup>13</sup> C)                              | 51 |
| 2-Hexyloxy octane ( <b>17g</b> ) ( <sup>1</sup> H and <sup>13</sup> C)                            | 52 |
| 2-Butoxy-tetrahydro-2H-pyran ( <b>17h</b> ) ( <sup>1</sup> H and <sup>13</sup> C)                 | 53 |
| 2-Hexyloxy-tetrahydro-2H-pyran ( <b>17i</b> ): ( <sup>1</sup> H and <sup>13</sup> C)              | 54 |
| 1-Butoxy-1-methyl cyclohexane ( <b>17j</b> ): ( <sup>1</sup> H and <sup>13</sup> C)               | 55 |
| 1-Hexyloxy 1-methyl cyclohexane ( <b>17k</b> ): ( <sup>1</sup> H and <sup>13</sup> C)             | 56 |
| ( <i>E/Z</i> )-1-Butoxyundec-2-ene ( <b>17l</b> ): ( <sup>1</sup> H and <sup>13</sup> C)          | 57 |
| ( <i>E/Z</i> )-Hexyl 2-undecenyl ether ( <b>17m</b> ): ( <sup>1</sup> H and <sup>13</sup> C)      | 58 |

#### Reactions of peroxides with *sp*<sup>2</sup> organometallics:

|                                                                                                   |    |
|---------------------------------------------------------------------------------------------------|----|
| 3,7-Dimethyl-6-octen-1-yl phenyl ether ( <b>18a</b> ) ( <sup>1</sup> H and <sup>13</sup> C)       | 59 |
| 2-Methylprop-1-en-1-yl 3-phenylpropyl ether ( <b>18b</b> ): ( <sup>1</sup> H and <sup>13</sup> C) | 60 |
| 3,7-Dimethyl-6-octen-1-yl vinyl ether ( <b>18c</b> ): ( <sup>1</sup> H and <sup>13</sup> C)       | 61 |
| 2-(3,7-Dimethyloct-6-en-1-oxy)-thiophene ( <b>18d</b> ) ( <sup>1</sup> H and <sup>13</sup> C)     | 62 |

2-(Decyloxy)-thiophene (**18e**): ( $^1\text{H}$  and  $^{13}\text{C}$ ) 63

Reaction with lithiated dithianes:

3,3-Difluoro-3-((10-phenyldecyl)oxy)propylbenzene (**19**): ( $^1\text{H}$  and  $^{13}\text{C}$ ) 64

Synthesis of mixed acetals:

Tributyl(1-(methoxymethoxy)-3-phenylpropyl)stannane (**20**) ( $^1\text{H}$  and  $^{13}\text{C}$ ) 65

Benzene, 3-methoxymethoxy-3-octyloxypropyl (**21a**): ( $^1\text{H}$  and  $^{13}\text{C}$ ) 66

3-Methoxymethoxy-3-phenylpropoxy propylbenzene (**21b**)  $^1\text{H}$  and  $^{13}\text{C}$ ) 67

3-Decyloxy-3-methoxymethoxy propyl benzene (**21c**) ( $^1\text{H}$  and  $^{13}\text{C}$ ) 68

3-((3,7-Dimethyloct-6-en-1-yl)oxy)-3-(methoxymethoxy)propylbenzene (**21d**): ( $^1\text{H}$ ,  $^{13}\text{C}$ ) 69

3-methoxymethoxy-2-methyl-5-phenylpentan-2-ol (**22**) ( $^1\text{H}$  and  $^{13}\text{C}$ ) 70

3-methoxymethoxypropyl benzene ( $^1\text{H}$  and  $^{13}\text{C}$ ) 71

Synthesis of cyclopropyl ethers:

3,7-Dimethyloct-6-en-1-yl cyclopropyl ether (**23a**): ( $^1\text{H}$  and  $^{13}\text{C}$ ) 72

Cyclopropyl 3-phenylpropyl ether (**23b**): ( $^1\text{H}$  and  $^{13}\text{C}$ ) 73

Cyclopropyl decyl ether (**23c**) ( $^1\text{H}$  and  $^{13}\text{C}$ ) 74

Cyclopropyl 2-octyl ether (**23d**) ( $^1\text{H}$  and  $^{13}\text{C}$ ) 75

Synthesis of radical probes

1,1-dimethyl-2-phenylethyl hydroperoxide ( $^1\text{H}$  and  $^{13}\text{C}$ ) 76

t-Butyl 1,1-dimethyl-2-phenylethyl peroxide (**24a**) ( $^1\text{H}$  and  $^{13}\text{C}$ ) 77

2-((2-Methyl-3-phenylpropan-1-yl)tetrahydro-2H-pyranyl) peroxide (**24b**): ( $^1\text{H}$  and  $^{13}\text{C}$ ) 78

Triethylsilyl (2-methyl-1-phenylpropan-2-yl) peroxide (**24d**) ( $^1\text{H}$  and  $^{13}\text{C}$ ) 79

Reactions of organometallics with radical probes

2-Butoxy-2-methylpropylbenzene (**25a**) ( $^1\text{H}$  and  $^{13}\text{C}$ ) 80

(2-Hexyloxy-2-methylpropyl)benzene (**25b**): ( $^1\text{H}$  and  $^{13}\text{C}$ ) 81

2-Methyl-1-phenylpropan-2-ol (**26**) ( $^1\text{H}$  and  $^{13}\text{C}$ ) 82

Pentylbenzene ( $^1\text{H}$  and  $^{13}\text{C}$ ) 83

Triethylsilanol ( $^1\text{H}$  and  $^{13}\text{C}$ ) 84

Competition reactions:

|                                                                             |    |
|-----------------------------------------------------------------------------|----|
| Butyl decyl ether ( <b>27</b> ): ( $^1\text{H}$ and $^{13}\text{C}$ )       | 85 |
| 3-butoxypropyl benzene ( <b>28</b> ) ( $^1\text{H}$ and $^{13}\text{C}$ )   | 86 |
| 3-Phenoxy propyl benzene ( <b>29</b> ) ( $^1\text{H}$ and $^{13}\text{C}$ ) | 87 |
| Biphenyl ( $^1\text{H}$ and $^{13}\text{C}$ )                               | 88 |

**B3LYP/6-31+G(d,p) Optimized Coordinates, Electronic Energy (hartree), and Zero-Point Energy (Z-PE, hartree) of All Structures Labeled in Scheme 5.**

**Series: M = Li, R = t-Bu**

**ROOCH<sub>3</sub>**

| Center Number | Atomic Number | Atomic Type | Coordinates (Angstroms) |           |           |
|---------------|---------------|-------------|-------------------------|-----------|-----------|
|               |               |             | X                       | Y         | Z         |
| 1             | 6             | 0           | 0.000000                | 0.000000  | 0.000000  |
| 2             | 6             | 0           | 0.000000                | 0.000000  | 1.533651  |
| 3             | 6             | 0           | 1.423955                | 0.000000  | 2.103459  |
| 4             | 1             | 0           | 1.984956                | 0.868284  | 1.749504  |
| 5             | 1             | 0           | 1.396243                | 0.028408  | 3.197064  |
| 6             | 1             | 0           | 1.955483                | -0.905414 | 1.791292  |
| 7             | 6             | 0           | -0.817725               | -1.173097 | 2.088728  |
| 8             | 1             | 0           | -0.364067               | -2.118132 | 1.773747  |
| 9             | 1             | 0           | -0.841334               | -1.146448 | 3.182119  |
| 10            | 1             | 0           | -1.846235               | -1.141483 | 1.716564  |
| 11            | 8             | 0           | -0.739335               | 1.140197  | 2.037959  |
| 12            | 8             | 0           | -0.042567               | 2.366366  | 1.625158  |
| 13            | 6             | 0           | -1.069365               | 3.320219  | 1.419849  |
| 14            | 1             | 0           | -1.656388               | 3.472614  | 2.333568  |
| 15            | 1             | 0           | -0.540194               | 4.243903  | 1.165260  |
| 16            | 1             | 0           | -1.731204               | 3.026437  | 0.595988  |
| 17            | 1             | 0           | 0.526324                | 0.876300  | -0.386601 |
| 18            | 1             | 0           | 0.500662                | -0.896810 | -0.380359 |
| 19            | 1             | 0           | -1.025594               | 0.010110  | -0.382996 |

Electronic Energy = -348.144760513 Zero-Point Energy = 0.166644

**CH<sub>3</sub>M (M = Li, R = t-Bu)**

| Center Number | Atomic Number | Atomic Type | Coordinates (Angstroms) |           |           |
|---------------|---------------|-------------|-------------------------|-----------|-----------|
|               |               |             | X                       | Y         | Z         |
| 1             | 6             | 0           | 0.000000                | 0.000000  | 0.000000  |
| 2             | 1             | 0           | 0.000000                | 0.000000  | 1.101519  |
| 3             | 3             | 0           | 1.838809                | 0.000000  | -0.751486 |
| 4             | 1             | 0           | -0.578614               | -0.883046 | -0.314291 |
| 5             | 1             | 0           | -0.578614               | 0.883046  | -0.314291 |

Electronic Energy = -47.4099503490 Zero-Point Energy = 0.033322

**II (M = Li, R = t-Bu)**

| Center<br>Number | Atomic<br>Number | Atomic<br>Type | Coordinates (Angstroms) |           |           |
|------------------|------------------|----------------|-------------------------|-----------|-----------|
|                  |                  |                | X                       | Y         | Z         |
| 1                | 6                | 0              | -0.268834               | -1.433332 | 0.092589  |
| 2                | 8                | 0              | 0.276686                | -0.398672 | 0.918117  |
| 3                | 8                | 0              | 1.461319                | -0.963484 | 1.596175  |
| 4                | 6                | 0              | 2.646619                | -0.125536 | 1.340567  |
| 5                | 6                | 0              | 2.398490                | 1.296127  | 1.850536  |
| 6                | 1                | 0              | 1.600044                | 1.784565  | 1.285924  |
| 7                | 1                | 0              | 2.130424                | 1.293291  | 2.912563  |
| 8                | 1                | 0              | 3.308302                | 1.893450  | 1.734629  |
| 9                | 6                | 0              | 2.981160                | -0.155879 | -0.150770 |
| 10               | 1                | 0              | 2.183264                | 0.302724  | -0.741143 |
| 11               | 1                | 0              | 3.900341                | 0.408782  | -0.334988 |
| 12               | 1                | 0              | 3.136854                | -1.182976 | -0.494701 |
| 13               | 6                | 0              | 3.704264                | -0.852513 | 2.178697  |
| 14               | 1                | 0              | 4.658982                | -0.326939 | 2.080854  |
| 15               | 1                | 0              | 3.425673                | -0.866991 | 3.236130  |
| 16               | 1                | 0              | 3.839054                | -1.881887 | 1.834638  |
| 17               | 3                | 0              | 0.069583                | -0.462888 | 2.975303  |
| 18               | 6                | 0              | -0.763128               | -0.245003 | 4.779472  |
| 19               | 1                | 0              | -1.109523               | 0.784936  | 4.974447  |
| 20               | 1                | 0              | -1.649894               | -0.888407 | 4.916852  |
| 21               | 1                | 0              | -0.081459               | -0.496199 | 5.610725  |
| 22               | 1                | 0              | 0.418870                | -1.683438 | -0.719550 |
| 23               | 1                | 0              | -0.506132               | -2.323159 | 0.683247  |
| 24               | 1                | 0              | -1.187856               | -0.994725 | -0.306401 |

Electronic Energy = -395.58520113 Zero-Point Energy = 0.201671

**TS III (M = Li, R = t-Bu)**

| Center<br>Number | Atomic<br>Number | Atomic<br>Type | Coordinates (Angstroms) |           |           |
|------------------|------------------|----------------|-------------------------|-----------|-----------|
|                  |                  |                | X                       | Y         | Z         |
| 1                | 6                | 0              | -0.081949               | 0.009900  | 0.049293  |
| 2                | 8                | 0              | -1.167976               | 0.263292  | -0.805253 |
| 3                | 3                | 0              | -3.026125               | -0.093124 | -0.400788 |
| 4                | 8                | 0              | -2.533263               | 1.521970  | 0.002439  |
| 5                | 6                | 0              | -5.074297               | -0.128577 | 0.387009  |
| 6                | 1                | 0              | -5.643516               | 0.198322  | -0.482398 |
| 7                | 1                | 0              | -5.119374               | -1.198688 | 0.598396  |
| 8                | 1                | 0              | -5.148486               | 0.516874  | 1.256641  |
| 9                | 6                | 0              | -2.469086               | 2.755352  | -0.640655 |

|    |   |   |           |           |           |
|----|---|---|-----------|-----------|-----------|
| 10 | 1 | 0 | -3.378043 | 3.313593  | -0.357550 |
| 11 | 1 | 0 | -1.602759 | 3.348063  | -0.318139 |
| 12 | 1 | 0 | -2.463594 | 2.655213  | -1.736074 |
| 13 | 6 | 0 | 0.794505  | -1.003200 | -0.738680 |
| 14 | 1 | 0 | 1.676438  | -1.268005 | -0.143581 |
| 15 | 1 | 0 | 0.229468  | -1.915262 | -0.952462 |
| 16 | 1 | 0 | 1.122461  | -0.564661 | -1.684855 |
| 17 | 6 | 0 | 0.715581  | 1.299185  | 0.306816  |
| 18 | 1 | 0 | 1.618241  | 1.094377  | 0.893131  |
| 19 | 1 | 0 | 1.011783  | 1.757559  | -0.641926 |
| 20 | 1 | 0 | 0.099546  | 2.012794  | 0.861844  |
| 21 | 6 | 0 | -0.548408 | -0.619094 | 1.375590  |
| 22 | 1 | 0 | 0.297604  | -0.839603 | 2.035912  |
| 23 | 1 | 0 | -1.221832 | 0.068932  | 1.896866  |
| 24 | 1 | 0 | -1.080116 | -1.560111 | 1.188185  |

-----  
 Electronic Energy = -395.56562573 Zero-Point Energy = 0.198141

**IV (M = Li, R = t-Bu)**

| Center<br>Number | Atomic<br>Number | Atomic<br>Type | Coordinates (Angstroms) |           |           |
|------------------|------------------|----------------|-------------------------|-----------|-----------|
|                  |                  |                | X                       | Y         | Z         |
| 1                | 6                | 0              | 0.004639                | -0.010878 | 0.011409  |
| 2                | 8                | 0              | 1.386255                | -0.071420 | 0.060408  |
| 3                | 3                | 0              | 3.007872                | -0.146105 | 0.111409  |
| 4                | 8                | 0              | 4.918394                | -0.052501 | 0.045223  |
| 5                | 6                | 0              | 5.581843                | 1.029789  | -0.616312 |
| 6                | 1                | 0              | 6.215537                | 1.578867  | 0.090816  |
| 7                | 1                | 0              | 6.193545                | 0.653489  | -1.445356 |
| 8                | 1                | 0              | 4.809532                | 1.695206  | -1.006146 |
| 9                | 6                | 0              | 5.821579                | -1.007999 | 0.607490  |
| 10               | 1                | 0              | 6.442111                | -1.456698 | -0.177956 |
| 11               | 1                | 0              | 6.464560                | -0.531617 | 1.357773  |
| 12               | 1                | 0              | 5.220221                | -1.784277 | 1.083874  |
| 13               | 6                | 0              | -0.564884               | 0.202263  | 1.434700  |
| 14               | 1                | 0              | -1.661361               | 0.258350  | 1.443502  |
| 15               | 1                | 0              | -0.255077               | -0.623850 | 2.085377  |
| 16               | 1                | 0              | -0.166744               | 1.132385  | 1.856783  |
| 17               | 6                | 0              | -0.438547               | 1.166601  | -0.890311 |
| 18               | 1                | 0              | -1.530801               | 1.255795  | -0.957595 |
| 19               | 1                | 0              | -0.038084               | 2.106723  | -0.493182 |
| 20               | 1                | 0              | -0.039643               | 1.028795  | -1.902138 |
| 21               | 6                | 0              | -0.559813               | -1.330660 | -0.567260 |
| 22               | 1                | 0              | -1.656148               | -1.328420 | -0.626300 |
| 23               | 1                | 0              | -0.158634               | -1.494178 | -1.574310 |

24 1 0 -0.248735 -2.173076 0.061517

-----  
Electronic Energy = -395.72907068 Zero-Point Energy = 0.206463

**ROM** (M = Li, R = t-Bu)

-----

| Center<br>Number | Atomic<br>Number | Atomic<br>Type | Coordinates (Angstroms) |           |           |
|------------------|------------------|----------------|-------------------------|-----------|-----------|
|                  |                  |                | X                       | Y         | Z         |
| 1                | 6                | 0              | -0.000108               | -0.000049 | 0.000140  |
| 2                | 6                | 0              | -0.520399               | -0.061786 | 1.454236  |
| 3                | 1                | 0              | -0.152660               | -0.971458 | 1.942752  |
| 4                | 1                | 0              | -0.148219               | 0.800713  | 2.019009  |
| 5                | 1                | 0              | -1.616705               | -0.061284 | 1.504072  |
| 6                | 6                | 0              | -0.518833               | -1.228560 | -0.781132 |
| 7                | 1                | 0              | -1.615027               | -1.271383 | -0.809216 |
| 8                | 1                | 0              | -0.147662               | -1.197103 | -1.811984 |
| 9                | 1                | 0              | -0.148731               | -2.148990 | -0.315067 |
| 10               | 6                | 0              | -0.519337               | 1.290515  | -0.673581 |
| 11               | 1                | 0              | -0.148095               | 2.168059  | -0.131835 |
| 12               | 1                | 0              | -0.150192               | 1.346630  | -1.704089 |
| 13               | 1                | 0              | -1.615594               | 1.335829  | -0.695909 |
| 14               | 8                | 0              | 1.389658                | -0.000138 | 0.000930  |
| 15               | 3                | 0              | 2.994254                | -0.000488 | 0.001449  |

-----

Electronic Energy = -240.65654517 Zero-Point Energy = 0.125188

**CH<sub>3</sub>OCH<sub>3</sub>** (M = Li, R = t-Bu)

-----

| Center<br>Number | Atomic<br>Number | Atomic<br>Type | Coordinates (Angstroms) |           |           |
|------------------|------------------|----------------|-------------------------|-----------|-----------|
|                  |                  |                | X                       | Y         | Z         |
| 1                | 6                | 0              | 0.016461                | 0.006851  | 0.010759  |
| 2                | 8                | 0              | -0.018126               | -0.001046 | 1.425528  |
| 3                | 6                | 0              | 1.272169                | -0.001710 | 2.004672  |
| 4                | 1                | 0              | 1.141321                | -0.006315 | 3.089283  |
| 5                | 1                | 0              | 1.846278                | -0.893950 | 1.708405  |
| 6                | 1                | 0              | 1.844066                | 0.894414  | 1.715772  |
| 7                | 1                | 0              | 0.528625                | -0.885043 | -0.383383 |
| 8                | 1                | 0              | -1.019064               | 0.005979  | -0.336842 |
| 9                | 1                | 0              | 0.525163                | 0.904382  | -0.374824 |

-----

Electronic Energy = -155.04131200 Zero-Point Energy = 0.079631



Series: M = Li, R = THP

ROOCH<sub>3</sub> (M = Li, R = THP)

| Center Number | Atomic Number | Atomic Type | Coordinates (Angstroms) |           |           |
|---------------|---------------|-------------|-------------------------|-----------|-----------|
|               |               |             | X                       | Y         | Z         |
| 1             | 6             | 0           | 0.000000                | 0.000000  | 0.000000  |
| 2             | 6             | 0           | 0.000000                | 0.000000  | 1.538238  |
| 3             | 6             | 0           | 1.443195                | 0.000000  | 2.064687  |
| 4             | 6             | 0           | 2.243814                | 1.124958  | 1.406899  |
| 5             | 8             | 0           | 2.193538                | 1.048803  | -0.022713 |
| 6             | 6             | 0           | 0.878986                | 1.133757  | -0.521975 |
| 7             | 1             | 0           | 0.441286                | 2.119197  | -0.281792 |
| 8             | 8             | 0           | 1.079012                | 1.063406  | -1.935128 |
| 9             | 8             | 0           | -0.176339               | 1.505777  | -2.534268 |
| 10            | 6             | 0           | 0.174651                | 2.551588  | -3.431510 |
| 11            | 1             | 0           | 0.874452                | 2.193484  | -4.194314 |
| 12            | 1             | 0           | -0.772403               | 2.836844  | -3.899927 |
| 13            | 1             | 0           | 0.604952                | 3.407745  | -2.898942 |
| 14            | 1             | 0           | 1.860097                | 2.107252  | 1.731543  |
| 15            | 1             | 0           | 3.305307                | 1.073602  | 1.661277  |
| 16            | 1             | 0           | 1.923987                | -0.959395 | 1.835684  |
| 17            | 1             | 0           | 1.466405                | 0.126712  | 3.154289  |
| 18            | 1             | 0           | -0.523456               | 0.894165  | 1.906732  |
| 19            | 1             | 0           | -0.554508               | -0.864727 | 1.919055  |
| 20            | 1             | 0           | 0.413134                | -0.939954 | -0.385184 |
| 21            | 1             | 0           | -1.012035               | 0.112306  | -0.401841 |

Electronic Energy = -461.45919003 Zero-Point Energy = 0.181506

CH<sub>3</sub>M (M = Li, R = THP)

| Center Number | Atomic Number | Atomic Type | Coordinates (Angstroms) |           |           |
|---------------|---------------|-------------|-------------------------|-----------|-----------|
|               |               |             | X                       | Y         | Z         |
| 1             | 6             | 0           | 0.000000                | 0.000000  | 0.000000  |
| 2             | 1             | 0           | 0.000000                | 0.000000  | 1.101519  |
| 3             | 3             | 0           | 1.838809                | 0.000000  | -0.751486 |
| 4             | 1             | 0           | -0.578614               | -0.883046 | -0.314291 |
| 5             | 1             | 0           | -0.578614               | 0.883046  | -0.314291 |

Electronic Energy = -47.4099503490 Zero-Point Energy = 0.033322

## II (M = Li, R = THP)

| Center<br>Number | Atomic<br>Number | Atomic<br>Type | Coordinates (Angstroms) |           |          |
|------------------|------------------|----------------|-------------------------|-----------|----------|
|                  |                  |                | X                       | Y         | Z        |
| 1                | 6                | 0              | -0.259545               | 0.550608  | 1.487799 |
| 2                | 3                | 0              | 1.079965                | -0.314965 | 2.720402 |
| 3                | 8                | 0              | 3.107629                | -0.472275 | 2.529756 |
| 4                | 6                | 0              | 3.732987                | -0.713343 | 1.269323 |
| 5                | 1                | 0              | 3.480389                | 0.170877  | 0.679541 |
| 6                | 1                | 0              | 4.816227                | -0.801666 | 1.394043 |
| 7                | 1                | 0              | 3.317028                | -1.607639 | 0.796225 |
| 8                | 8                | 0              | 3.365630                | -1.684142 | 3.347854 |
| 9                | 6                | 0              | 2.868285                | -1.386341 | 4.618381 |
| 10               | 6                | 0              | 3.155821                | -2.584285 | 5.516333 |
| 11               | 6                | 0              | 2.458316                | -2.391180 | 6.875762 |
| 12               | 6                | 0              | 0.967225                | -2.072999 | 6.685238 |
| 13               | 6                | 0              | 0.789442                | -0.897782 | 5.728572 |
| 14               | 8                | 0              | 1.459136                | -1.161872 | 4.476388 |
| 15               | 1                | 0              | -0.255535               | -0.725655 | 5.464838 |
| 16               | 1                | 0              | 1.195633                | 0.029064  | 6.161179 |
| 17               | 1                | 0              | 0.445304                | -2.947023 | 6.277027 |
| 18               | 1                | 0              | 0.496762                | -1.829926 | 7.645132 |
| 19               | 1                | 0              | 2.942277                | -1.570064 | 7.422389 |
| 20               | 1                | 0              | 2.587078                | -3.291910 | 7.484641 |
| 21               | 1                | 0              | 2.777747                | -3.482862 | 5.015886 |
| 22               | 1                | 0              | 4.238230                | -2.692440 | 5.637506 |
| 23               | 1                | 0              | 3.329796                | -0.460902 | 4.998504 |
| 24               | 1                | 0              | -1.283965               | 0.562373  | 1.900067 |
| 25               | 1                | 0              | -0.020620               | 1.602611  | 1.251243 |
| 26               | 1                | 0              | -0.337643               | 0.033838  | 0.514372 |

Electronic Energy = -508.91668091 Zero-Point Energy = 0.217024

## III (M = Li, R = THP)

| Center<br>Number | Atomic<br>Number | Atomic<br>Type | Coordinates (Angstroms) |           |          |
|------------------|------------------|----------------|-------------------------|-----------|----------|
|                  |                  |                | X                       | Y         | Z        |
| 1                | 6                | 0              | 0.654434                | 0.065428  | 0.083312 |
| 2                | 3                | 0              | -0.340521               | -0.269998 | 1.905763 |
| 3                | 8                | 0              | 1.213878                | -0.146847 | 2.776682 |
| 4                | 6                | 0              | 2.557853                | -0.577634 | 2.739845 |
| 5                | 1                | 0              | 2.908711                | -0.377371 | 1.721896 |
| 6                | 1                | 0              | 3.164270                | -0.010403 | 3.454064 |
| 7                | 1                | 0              | 2.634963                | -1.651642 | 2.945803 |

|    |   |   |           |           |           |
|----|---|---|-----------|-----------|-----------|
| 8  | 8 | 0 | 0.718985  | -0.503367 | 4.398825  |
| 9  | 6 | 0 | -0.327613 | 0.342602  | 4.584075  |
| 10 | 6 | 0 | -0.925179 | 0.101509  | 5.975265  |
| 11 | 6 | 0 | -2.204038 | 0.933176  | 6.172831  |
| 12 | 6 | 0 | -3.196221 | 0.685935  | 5.028578  |
| 13 | 6 | 0 | -2.515114 | 0.902342  | 3.679608  |
| 14 | 8 | 0 | -1.347692 | 0.068998  | 3.551842  |
| 15 | 1 | 0 | -3.169417 | 0.633251  | 2.846076  |
| 16 | 1 | 0 | -2.221818 | 1.957172  | 3.558382  |
| 17 | 1 | 0 | -3.575264 | -0.342701 | 5.075216  |
| 18 | 1 | 0 | -4.060041 | 1.357162  | 5.107889  |
| 19 | 1 | 0 | -1.946090 | 2.000706  | 6.208772  |
| 20 | 1 | 0 | -2.659356 | 0.687852  | 7.138717  |
| 21 | 1 | 0 | -1.141124 | -0.968907 | 6.064855  |
| 22 | 1 | 0 | -0.169411 | 0.355061  | 6.725254  |
| 23 | 1 | 0 | -0.041422 | 1.400867  | 4.448454  |
| 24 | 1 | 0 | -0.165825 | 0.263697  | -0.619686 |
| 25 | 1 | 0 | 1.347378  | 0.910188  | 0.108017  |
| 26 | 1 | 0 | 1.174039  | -0.861943 | -0.181870 |

-----  
 Electronic Energy = -508.91047097 Zero-Point Energy = 0.215297

IV (M = Li, R = THP)

| Center<br>Number | Atomic<br>Number | Atomic<br>Type | Coordinates (Angstroms) |           |           |
|------------------|------------------|----------------|-------------------------|-----------|-----------|
|                  |                  |                | X                       | Y         | Z         |
| 1                | 6                | 0              | -0.220352               | 0.406320  | 0.215110  |
| 2                | 8                | 0              | -1.253307               | -0.567636 | 0.111164  |
| 3                | 6                | 0              | -0.766565               | -1.914109 | -0.017160 |
| 4                | 1                | 0              | -0.156082               | -2.007782 | -0.923987 |
| 5                | 1                | 0              | -0.166270               | -2.181460 | 0.861422  |
| 6                | 1                | 0              | -1.645372               | -2.557917 | -0.084874 |
| 7                | 3                | 0              | -3.156587               | -0.566635 | 0.080950  |
| 8                | 8                | 0              | -4.054472               | -2.112087 | -0.082103 |
| 9                | 6                | 0              | -5.236868               | -1.529253 | -0.031399 |
| 10               | 6                | 0              | -6.142065               | -1.685687 | -1.258028 |
| 11               | 6                | 0              | -7.394825               | -0.796607 | -1.189934 |
| 12               | 6                | 0              | -7.019531               | 0.680311  | -0.993003 |
| 13               | 6                | 0              | -6.087654               | 0.842699  | 0.209965  |
| 14               | 8                | 0              | -4.940572               | 0.015427  | 0.081877  |
| 15               | 1                | 0              | -5.736882               | 1.877286  | 0.307592  |
| 16               | 1                | 0              | -6.625922               | 0.584525  | 1.138289  |
| 17               | 1                | 0              | -6.508821               | 1.056346  | -1.889779 |
| 18               | 1                | 0              | -7.916999               | 1.295918  | -0.846254 |
| 19               | 1                | 0              | -8.028059               | -1.120984 | -0.350943 |

|    |   |   |           |           |           |
|----|---|---|-----------|-----------|-----------|
| 20 | 1 | 0 | -7.999202 | -0.917910 | -2.097290 |
| 21 | 1 | 0 | -5.539721 | -1.446427 | -2.143935 |
| 22 | 1 | 0 | -6.418759 | -2.744784 | -1.331534 |
| 23 | 1 | 0 | -5.820193 | -1.716813 | 0.899110  |
| 24 | 1 | 0 | 0.399315  | 0.219429  | 1.101849  |
| 25 | 1 | 0 | 0.414663  | 0.393898  | -0.680370 |
| 26 | 1 | 0 | -0.698287 | 1.383774  | 0.306622  |

-----  
 Electronic Energy = -509.07220251 Zero-Point Energy = 0.221195

**ROM (M = Li, R = THP)**

| Center<br>Number | Atomic<br>Number | Atomic<br>Type | Coordinates (Angstroms) |           |           |
|------------------|------------------|----------------|-------------------------|-----------|-----------|
|                  |                  |                | X                       | Y         | Z         |
| 1                | 6                | 0              | 0.000000                | 0.000000  | 0.000000  |
| 2                | 6                | 0              | -0.941288               | 1.055419  | 0.582653  |
| 3                | 8                | 0              | -2.291065               | 0.784194  | 0.227006  |
| 4                | 6                | 0              | -2.850381               | -0.630952 | 0.708065  |
| 5                | 6                | 0              | -1.911832               | -1.668454 | 0.089811  |
| 6                | 6                | 0              | -0.433928               | -1.410182 | 0.428004  |
| 7                | 1                | 0              | 0.201968                | -2.164659 | -0.050509 |
| 8                | 1                | 0              | -0.282151               | -1.520279 | 1.511720  |
| 9                | 1                | 0              | -2.073557               | -1.656144 | -0.995659 |
| 10               | 1                | 0              | -2.228947               | -2.654307 | 0.451654  |
| 11               | 1                | 0              | -2.690712               | -0.565688 | 1.806616  |
| 12               | 8                | 0              | -4.111646               | -0.653143 | 0.321108  |
| 13               | 3                | 0              | -4.023980               | 0.968303  | -0.351621 |
| 14               | 1                | 0              | -0.850256               | 1.075172  | 1.681687  |
| 15               | 1                | 0              | -0.698495               | 2.058243  | 0.211559  |
| 16               | 1                | 0              | -0.014481               | 0.077194  | -1.095493 |
| 17               | 1                | 0              | 1.027083                | 0.208212  | 0.327240  |

-----  
 Electronic Energy = -354.00163109 Zero-Point Energy = 0.139566

**CH<sub>3</sub>OCH<sub>3</sub> (M = Li, R = THP)**

| Center<br>Number | Atomic<br>Number | Atomic<br>Type | Coordinates (Angstroms) |           |          |
|------------------|------------------|----------------|-------------------------|-----------|----------|
|                  |                  |                | X                       | Y         | Z        |
| 1                | 6                | 0              | 0.016461                | 0.006851  | 0.010759 |
| 2                | 8                | 0              | -0.018126               | -0.001046 | 1.425528 |
| 3                | 6                | 0              | 1.272169                | -0.001710 | 2.004672 |
| 4                | 1                | 0              | 1.141321                | -0.006315 | 3.089283 |
| 5                | 1                | 0              | 1.846278                | -0.893950 | 1.708405 |
| 6                | 1                | 0              | 1.844066                | 0.894414  | 1.715772 |

|   |   |   |           |           |           |
|---|---|---|-----------|-----------|-----------|
| 7 | 1 | 0 | 0.528625  | -0.885043 | -0.383383 |
| 8 | 1 | 0 | -1.019064 | 0.005979  | -0.336842 |
| 9 | 1 | 0 | 0.525163  | 0.904382  | -0.374824 |

Electronic Energy = -155.04131200

Zero-Point Energy = 0.079631

**Series: M = Na, R = t-Bu**

**ROOCH<sub>3</sub>** (M = Na, R = t-Bu)

| Center Number | Atomic Number | Atomic Type | Coordinates (Angstroms) |           |           |
|---------------|---------------|-------------|-------------------------|-----------|-----------|
|               |               |             | X                       | Y         | Z         |
| 1             | 6             | 0           | 0.000000                | 0.000000  | 0.000000  |
| 2             | 6             | 0           | 0.000000                | 0.000000  | 1.533651  |
| 3             | 6             | 0           | 1.423955                | 0.000000  | 2.103459  |
| 4             | 1             | 0           | 1.984956                | 0.868284  | 1.749504  |
| 5             | 1             | 0           | 1.396243                | 0.028408  | 3.197064  |
| 6             | 1             | 0           | 1.955483                | -0.905414 | 1.791292  |
| 7             | 6             | 0           | -0.817725               | -1.173097 | 2.088728  |
| 8             | 1             | 0           | -0.364067               | -2.118132 | 1.773747  |
| 9             | 1             | 0           | -0.841334               | -1.146448 | 3.182119  |
| 10            | 1             | 0           | -1.846235               | -1.141483 | 1.716564  |
| 11            | 8             | 0           | -0.739335               | 1.140197  | 2.037959  |
| 12            | 8             | 0           | -0.042567               | 2.366366  | 1.625158  |
| 13            | 6             | 0           | -1.069365               | 3.320219  | 1.419849  |
| 14            | 1             | 0           | -1.656388               | 3.472614  | 2.333568  |
| 15            | 1             | 0           | -0.540194               | 4.243903  | 1.165260  |
| 16            | 1             | 0           | -1.731204               | 3.026437  | 0.595988  |
| 17            | 1             | 0           | 0.526324                | 0.876300  | -0.386601 |
| 18            | 1             | 0           | 0.500662                | -0.896810 | -0.380359 |
| 19            | 1             | 0           | -1.025594               | 0.010110  | -0.382996 |

Electronic Energy = -348.144760513

Zero-Point Energy = 0.166644

**CH<sub>3</sub>M** (M = Na, R = t-Bu)

| Center Number | Atomic Number | Atomic Type | Coordinates (Angstroms) |           |           |
|---------------|---------------|-------------|-------------------------|-----------|-----------|
|               |               |             | X                       | Y         | Z         |
| 1             | 6             | 0           | -0.085127               | 0.000000  | 0.034790  |
| 2             | 1             | 0           | -0.039438               | 0.000000  | 1.130289  |
| 3             | 11            | 0           | 2.054754                | 0.000000  | -0.839739 |
| 4             | 1             | 0           | -0.624698               | -0.893189 | -0.301783 |

5 1 0 -0.624698 0.893189 -0.301784

-----  
Electronic Energy = -202.17683220 Zero-Point Energy = 0.032840

**II** (M = Na, R = t-Bu)

-----

| Center<br>Number | Atomic<br>Number | Atomic<br>Type | Coordinates (Angstroms) |           |           |
|------------------|------------------|----------------|-------------------------|-----------|-----------|
|                  |                  |                | X                       | Y         | Z         |
| 1                | 6                | 0              | 0.182554                | -0.982199 | 0.605849  |
| 2                | 8                | 0              | 0.892206                | 0.200236  | 0.980799  |
| 3                | 8                | 0              | 1.746186                | -0.157554 | 2.125536  |
| 4                | 6                | 0              | 3.153329                | 0.126035  | 1.817272  |
| 5                | 6                | 0              | 3.831361                | -0.271704 | 3.133424  |
| 6                | 1                | 0              | 3.663021                | -1.329047 | 3.356999  |
| 7                | 1                | 0              | 4.909198                | -0.103171 | 3.048698  |
| 8                | 1                | 0              | 3.455417                | 0.328572  | 3.966991  |
| 9                | 6                | 0              | 3.622857                | -0.750268 | 0.654285  |
| 10               | 1                | 0              | 3.089640                | -0.499466 | -0.266779 |
| 11               | 1                | 0              | 4.690837                | -0.588901 | 0.477068  |
| 12               | 1                | 0              | 3.470884                | -1.810376 | 0.879218  |
| 13               | 6                | 0              | 3.333549                | 1.616903  | 1.518059  |
| 14               | 1                | 0              | 2.775997                | 1.908731  | 0.624377  |
| 15               | 1                | 0              | 2.999779                | 2.231381  | 2.361127  |
| 16               | 1                | 0              | 4.391625                | 1.836531  | 1.343888  |
| 17               | 11               | 0              | 0.177193                | 1.502179  | 2.955131  |
| 18               | 6                | 0              | -0.838495               | 3.003668  | 4.432762  |
| 19               | 1                | 0              | -1.930931               | 3.017145  | 4.305052  |
| 20               | 1                | 0              | -0.630965               | 2.736680  | 5.479617  |
| 21               | 1                | 0              | -0.474674               | 4.029697  | 4.273737  |
| 22               | 1                | 0              | -0.493304               | -0.648692 | -0.187194 |
| 23               | 1                | 0              | 0.865069                | -1.746747 | 0.224277  |
| 24               | 1                | 0              | -0.396931               | -1.377572 | 1.446605  |

-----

Electronic Energy = -550.33903279 Zero-Point Energy = 0.200395

**TS III** (M = Na, R = t-Bu)

-----

| Center<br>Number | Atomic<br>Number | Atomic<br>Type | Coordinates (Angstroms) |           |           |
|------------------|------------------|----------------|-------------------------|-----------|-----------|
|                  |                  |                | X                       | Y         | Z         |
| 1                | 6                | 0              | -0.026613               | -0.007895 | -0.000337 |
| 2                | 8                | 0              | -1.039230               | 0.177320  | -0.972338 |
| 3                | 11               | 0              | -3.234551               | -0.912223 | -0.373817 |
| 4                | 8                | 0              | -2.481124               | 1.025989  | -0.212803 |
| 5                | 6                | 0              | -5.021817               | 0.529652  | 0.640100  |

-----

|    |   |   |           |           |           |
|----|---|---|-----------|-----------|-----------|
| 6  | 1 | 0 | -5.440768 | 1.051575  | -0.222649 |
| 7  | 1 | 0 | -5.683804 | -0.252821 | 1.025738  |
| 8  | 1 | 0 | -4.679359 | 1.206284  | 1.420594  |
| 9  | 6 | 0 | -2.576355 | 2.285635  | -0.827443 |
| 10 | 1 | 0 | -3.493328 | 2.751443  | -0.438156 |
| 11 | 1 | 0 | -1.726623 | 2.930028  | -0.571568 |
| 12 | 1 | 0 | -2.660999 | 2.203975  | -1.919868 |
| 13 | 6 | 0 | 1.095727  | -0.742648 | -0.769759 |
| 14 | 1 | 0 | 1.939639  | -0.948699 | -0.100607 |
| 15 | 1 | 0 | 0.730784  | -1.692907 | -1.172376 |
| 16 | 1 | 0 | 1.449734  | -0.128344 | -1.602301 |
| 17 | 6 | 0 | 0.491242  | 1.338381  | 0.531960  |
| 18 | 1 | 0 | 1.336187  | 1.192715  | 1.214376  |
| 19 | 1 | 0 | 0.822532  | 1.969943  | -0.298377 |
| 20 | 1 | 0 | -0.301918 | 1.860639  | 1.074143  |
| 21 | 6 | 0 | -0.529767 | -0.885781 | 1.162529  |
| 22 | 1 | 0 | 0.255796  | -1.066143 | 1.904511  |
| 23 | 1 | 0 | -1.366305 | -0.393317 | 1.670097  |
| 24 | 1 | 0 | -0.852277 | -1.867698 | 0.788114  |

-----  
 Electronic Energy = -550.31657606 Zero-Point Energy = 0.197889

**IV (M = Na, R = t-Bu)**

| Center<br>Number | Atomic<br>Number | Atomic<br>Type | Coordinates (Angstroms) |           |           |
|------------------|------------------|----------------|-------------------------|-----------|-----------|
|                  |                  |                | X                       | Y         | Z         |
| 1                | 6                | 0              | -0.063148               | 0.188185  | -0.070970 |
| 2                | 8                | 0              | 1.299189                | 0.431278  | -0.089643 |
| 3                | 11               | 0              | 3.251493                | 0.114061  | -0.484811 |
| 4                | 8                | 0              | 4.422853                | 1.884881  | 0.298575  |
| 5                | 6                | 0              | 3.411857                | 2.741932  | 0.867931  |
| 6                | 1                | 0              | 3.608989                | 2.890878  | 1.937498  |
| 7                | 1                | 0              | 3.415415                | 3.713121  | 0.356299  |
| 8                | 1                | 0              | 2.449857                | 2.235430  | 0.721776  |
| 9                | 6                | 0              | 5.735927                | 2.418196  | 0.413208  |
| 10               | 1                | 0              | 5.813138                | 3.380644  | -0.110704 |
| 11               | 1                | 0              | 6.007826                | 2.562096  | 1.467766  |
| 12               | 1                | 0              | 6.426327                | 1.704110  | -0.042225 |
| 13               | 6                | 0              | -0.824792               | 1.388786  | -0.688274 |
| 14               | 1                | 0              | -1.913571               | 1.243091  | -0.695710 |
| 15               | 1                | 0              | -0.602574               | 2.298885  | -0.118576 |
| 16               | 1                | 0              | -0.488598               | 1.546859  | -1.719924 |
| 17               | 6                | 0              | -0.400182               | -1.085338 | -0.888909 |
| 18               | 1                | 0              | -1.474563               | -1.314336 | -0.900554 |
| 19               | 1                | 0              | -0.065786               | -0.956834 | -1.926019 |

|    |   |   |           |           |           |
|----|---|---|-----------|-----------|-----------|
| 20 | 1 | 0 | 0.129359  | -1.947390 | -0.463869 |
| 21 | 6 | 0 | -0.547774 | -0.015834 | 1.386960  |
| 22 | 1 | 0 | -1.627406 | -0.207720 | 1.452941  |
| 23 | 1 | 0 | -0.016840 | -0.863149 | 1.837129  |
| 24 | 1 | 0 | -0.318470 | 0.877723  | 1.979402  |

-----  
 Electronic Energy = -550.47205043 Zero-Point Energy = 0.204825

**ROM (M = Na, R = t-Bu)**

| Center<br>Number | Atomic<br>Number | Atomic<br>Type | Coordinates (Angstroms) |           |           |
|------------------|------------------|----------------|-------------------------|-----------|-----------|
|                  |                  |                | X                       | Y         | Z         |
| 1                | 6                | 0              | -0.013684               | 0.000123  | -0.000009 |
| 2                | 6                | 0              | -0.545472               | 1.069671  | 0.986226  |
| 3                | 1                | 0              | -0.174542               | 0.856973  | 1.995982  |
| 4                | 1                | 0              | -0.175871               | 2.059041  | 0.691290  |
| 5                | 1                | 0              | -1.642771               | 1.105861  | 1.020739  |
| 6                | 6                | 0              | -0.543916               | -1.389254 | 0.433617  |
| 7                | 1                | 0              | -1.641113               | -1.438235 | 0.449978  |
| 8                | 1                | 0              | -0.173877               | -2.156929 | -0.256454 |
| 9                | 1                | 0              | -0.172080               | -1.628478 | 1.437081  |
| 10               | 6                | 0              | -0.545340               | 0.319063  | -1.419531 |
| 11               | 1                | 0              | -0.174990               | 1.300305  | -1.739571 |
| 12               | 1                | 0              | -0.174798               | -0.430525 | -2.128925 |
| 13               | 1                | 0              | -1.642595               | 0.329998  | -1.468696 |
| 14               | 8                | 0              | 1.370234                | 0.000760  | -0.000403 |
| 15               | 11               | 0              | 3.334788                | 0.000057  | -0.001577 |

-----  
 Electronic Energy = -395.40630130 Zero-Point Energy = 0.123470

**CH<sub>3</sub>OCH<sub>3</sub> (M = Na, R = t-Bu)**

| Center<br>Number | Atomic<br>Number | Atomic<br>Type | Coordinates (Angstroms) |           |           |
|------------------|------------------|----------------|-------------------------|-----------|-----------|
|                  |                  |                | X                       | Y         | Z         |
| 1                | 6                | 0              | 0.016461                | 0.006851  | 0.010759  |
| 2                | 8                | 0              | -0.018126               | -0.001046 | 1.425528  |
| 3                | 6                | 0              | 1.272169                | -0.001710 | 2.004672  |
| 4                | 1                | 0              | 1.141321                | -0.006315 | 3.089283  |
| 5                | 1                | 0              | 1.846278                | -0.893950 | 1.708405  |
| 6                | 1                | 0              | 1.844066                | 0.894414  | 1.715772  |
| 7                | 1                | 0              | 0.528625                | -0.885043 | -0.383383 |
| 8                | 1                | 0              | -1.019064               | 0.005979  | -0.336842 |
| 9                | 1                | 0              | 0.525163                | 0.904382  | -0.374824 |



Electronic Energy = -155.04131200

Zero-Point Energy = 0.079631

**Series: M = Na, R = THP**

**ROOCH<sub>3</sub>**

| Center<br>Number | Atomic<br>Number | Atomic<br>Type | Coordinates (Angstroms) |           |           |
|------------------|------------------|----------------|-------------------------|-----------|-----------|
|                  |                  |                | X                       | Y         | Z         |
| 1                | 6                | 0              | 0.000000                | 0.000000  | 0.000000  |
| 2                | 6                | 0              | 0.000000                | 0.000000  | 1.538238  |
| 3                | 6                | 0              | 1.443195                | 0.000000  | 2.064687  |
| 4                | 6                | 0              | 2.243814                | 1.124958  | 1.406899  |
| 5                | 8                | 0              | 2.193538                | 1.048803  | -0.022713 |
| 6                | 6                | 0              | 0.878986                | 1.133757  | -0.521975 |
| 7                | 1                | 0              | 0.441286                | 2.119197  | -0.281792 |
| 8                | 8                | 0              | 1.079012                | 1.063406  | -1.935128 |
| 9                | 8                | 0              | -0.176339               | 1.505777  | -2.534268 |
| 10               | 6                | 0              | 0.174651                | 2.551588  | -3.431510 |
| 11               | 1                | 0              | 0.874452                | 2.193484  | -4.194314 |
| 12               | 1                | 0              | -0.772403               | 2.836844  | -3.899927 |
| 13               | 1                | 0              | 0.604952                | 3.407745  | -2.898942 |
| 14               | 1                | 0              | 1.860097                | 2.107252  | 1.731543  |
| 15               | 1                | 0              | 3.305307                | 1.073602  | 1.661277  |
| 16               | 1                | 0              | 1.923987                | -0.959395 | 1.835684  |
| 17               | 1                | 0              | 1.466405                | 0.126712  | 3.154289  |
| 18               | 1                | 0              | -0.523456               | 0.894165  | 1.906732  |
| 19               | 1                | 0              | -0.554508               | -0.864727 | 1.919055  |
| 20               | 1                | 0              | 0.413134                | -0.939954 | -0.385184 |
| 21               | 1                | 0              | -1.012035               | 0.112306  | -0.401841 |

Electronic Energy = -461.45919003 Zero-Point Energy = 0.181506

**CH<sub>3</sub>M (M = Na, R = THP)**

| Center<br>Number | Atomic<br>Number | Atomic<br>Type | Coordinates (Angstroms) |           |           |
|------------------|------------------|----------------|-------------------------|-----------|-----------|
|                  |                  |                | X                       | Y         | Z         |
| 1                | 6                | 0              | -0.085127               | 0.000000  | 0.034790  |
| 2                | 1                | 0              | -0.039438               | 0.000000  | 1.130289  |
| 3                | 11               | 0              | 2.054754                | 0.000000  | -0.839739 |
| 4                | 1                | 0              | -0.624698               | -0.893189 | -0.301783 |
| 5                | 1                | 0              | -0.624698               | 0.893189  | -0.301784 |

Electronic Energy = -202.17683220 Zero-Point Energy = 0.032840

**II (M = Na, R = THP)**

| Center<br>Number | Atomic<br>Number | Atomic<br>Type | Coordinates (Angstroms) |           |           |
|------------------|------------------|----------------|-------------------------|-----------|-----------|
|                  |                  |                | X                       | Y         | Z         |
| 1                | 6                | 0              | -0.078589               | 0.483870  | -1.312338 |
| 2                | 11               | 0              | 0.555145                | -0.164415 | 0.859604  |
| 3                | 8                | 0              | 2.589378                | -0.266647 | 2.226775  |
| 4                | 6                | 0              | 3.914491                | -0.609503 | 1.827476  |
| 5                | 1                | 0              | 4.197469                | 0.187763  | 1.134968  |
| 6                | 1                | 0              | 4.587448                | -0.623374 | 2.690391  |
| 7                | 1                | 0              | 3.928327                | -1.573869 | 1.309813  |
| 8                | 8                | 0              | 2.145340                | -1.363019 | 3.115466  |
| 9                | 6                | 0              | 1.160200                | -0.828330 | 3.951706  |
| 10               | 6                | 0              | 0.830280                | -1.893995 | 4.993504  |
| 11               | 6                | 0              | -0.372765               | -1.438171 | 5.839988  |
| 12               | 6                | 0              | -1.548007               | -1.022711 | 4.942235  |
| 13               | 6                | 0              | -1.087402               | -0.004645 | 3.902279  |
| 14               | 8                | 0              | 0.023021                | -0.521689 | 3.141822  |
| 15               | 1                | 0              | -1.864331               | 0.219546  | 3.168118  |
| 16               | 1                | 0              | -0.784337               | 0.938487  | 4.383053  |
| 17               | 1                | 0              | -1.955724               | -1.900136 | 4.425441  |
| 18               | 1                | 0              | -2.358639               | -0.589287 | 5.539777  |
| 19               | 1                | 0              | -0.074832               | -0.588918 | 6.470340  |
| 20               | 1                | 0              | -0.669892               | -2.243488 | 6.519700  |
| 21               | 1                | 0              | 0.596014                | -2.825169 | 4.465180  |
| 22               | 1                | 0              | 1.710322                | -2.071491 | 5.619764  |
| 23               | 1                | 0              | 1.525856                | 0.103215  | 4.411745  |
| 24               | 1                | 0              | -1.169949               | 0.435387  | -1.449246 |
| 25               | 1                | 0              | 0.232282                | 1.517101  | -1.531710 |
| 26               | 1                | 0              | 0.374350                | -0.163497 | -2.079069 |

Electronic Energy = -663.66769749 Zero-Point Energy = 0.215318

**TS III (M = Na, R = THP)**

| Center<br>Number | Atomic<br>Number | Atomic<br>Type | Coordinates (Angstroms) |           |           |
|------------------|------------------|----------------|-------------------------|-----------|-----------|
|                  |                  |                | X                       | Y         | Z         |
| 1                | 6                | 0              | -0.000203               | 0.000129  | -0.000160 |
| 2                | 11               | 0              | 2.215520                | -0.073720 | -1.064186 |
| 3                | 8                | 0              | 1.964042                | 1.950541  | -0.408240 |
| 4                | 6                | 0              | 1.156844                | 3.073983  | -0.143994 |
| 5                | 1                | 0              | 0.190687                | 2.681230  | 0.196376  |
| 6                | 1                | 0              | 1.589989                | 3.696745  | 0.648649  |

|    |   |   |           |           |           |
|----|---|---|-----------|-----------|-----------|
| 7  | 1 | 0 | 1.000578  | 3.674610  | -1.048663 |
| 8  | 8 | 0 | 3.462774  | 2.642075  | -0.987116 |
| 9  | 6 | 0 | 4.434618  | 1.972975  | -0.319376 |
| 10 | 6 | 0 | 5.793670  | 2.602057  | -0.661436 |
| 11 | 6 | 0 | 6.947687  | 1.801491  | -0.034526 |
| 12 | 6 | 0 | 6.846149  | 0.317005  | -0.408905 |
| 13 | 6 | 0 | 5.451983  | -0.213913 | -0.081001 |
| 14 | 8 | 0 | 4.433614  | 0.558714  | -0.735143 |
| 15 | 1 | 0 | 5.322909  | -1.244293 | -0.426704 |
| 16 | 1 | 0 | 5.281427  | -0.196746 | 1.008087  |
| 17 | 1 | 0 | 7.032418  | 0.186777  | -1.482502 |
| 18 | 1 | 0 | 7.596832  | -0.275403 | 0.128716  |
| 19 | 1 | 0 | 6.914186  | 1.904753  | 1.059109  |
| 20 | 1 | 0 | 7.908342  | 2.217446  | -0.358829 |
| 21 | 1 | 0 | 5.885654  | 2.623540  | -1.753210 |
| 22 | 1 | 0 | 5.793594  | 3.637311  | -0.306039 |
| 23 | 1 | 0 | 4.264848  | 1.967386  | 0.772624  |
| 24 | 1 | 0 | -0.298261 | -1.055024 | -0.000101 |
| 25 | 1 | 0 | 0.059527  | 0.396753  | 1.014979  |
| 26 | 1 | 0 | -0.651887 | 0.600631  | -0.639880 |

-----  
 Electronic Energy = -663.65869534 Zero-Point Energy = 0.213483

**IV (M = Na, R = THP)**

| Center<br>Number | Atomic<br>Number | Atomic<br>Type | Coordinates (Angstroms) |           |           |
|------------------|------------------|----------------|-------------------------|-----------|-----------|
|                  |                  |                | X                       | Y         | Z         |
| 1                | 6                | 0              | -0.891654               | -0.110436 | -0.151961 |
| 2                | 8                | 0              | -0.716602               | 1.188639  | 0.442981  |
| 3                | 6                | 0              | -1.736313               | 2.109266  | 0.078043  |
| 4                | 1                | 0              | -1.753062               | 2.263794  | -1.009638 |
| 5                | 1                | 0              | -2.722479               | 1.750406  | 0.403478  |
| 6                | 1                | 0              | -1.518493               | 3.059249  | 0.572110  |
| 7                | 11               | 0              | 1.161756                | 1.070764  | 1.738666  |
| 8                | 8                | 0              | 1.744438                | -0.980617 | 1.505247  |
| 9                | 6                | 0              | 2.916269                | -0.927660 | 2.092728  |
| 10               | 6                | 0              | 3.099089                | -1.809990 | 3.336791  |
| 11               | 6                | 0              | 4.438704                | -1.575304 | 4.053150  |
| 12               | 6                | 0              | 4.618082                | -0.095838 | 4.424075  |
| 13               | 6                | 0              | 4.401133                | 0.792589  | 3.196507  |
| 14               | 8                | 0              | 3.130414                | 0.560157  | 2.606599  |
| 15               | 1                | 0              | 4.452414                | 1.856145  | 3.463090  |
| 16               | 1                | 0              | 5.196841                | 0.599293  | 2.454922  |
| 17               | 1                | 0              | 3.889514                | 0.184811  | 5.197043  |
| 18               | 1                | 0              | 5.619211                | 0.085961  | 4.838116  |

|    |   |   |           |           |           |
|----|---|---|-----------|-----------|-----------|
| 19 | 1 | 0 | 5.263214  | -1.880970 | 3.392191  |
| 20 | 1 | 0 | 4.511269  | -2.205850 | 4.948335  |
| 21 | 1 | 0 | 2.255432  | -1.607544 | 4.009685  |
| 22 | 1 | 0 | 3.009791  | -2.854735 | 3.013601  |
| 23 | 1 | 0 | 3.794800  | -1.043832 | 1.414068  |
| 24 | 1 | 0 | -1.847735 | -0.543968 | 0.169300  |
| 25 | 1 | 0 | -0.879858 | -0.024587 | -1.246469 |
| 26 | 1 | 0 | -0.060414 | -0.733076 | 0.188784  |

-----  
 Electronic Energy = -663.81927375 Zero-Point Energy = 0.219280

**ROM (M = Na, R = THP)**

| Center<br>Number | Atomic<br>Number | Atomic<br>Type | Coordinates (Angstroms) |           |           |
|------------------|------------------|----------------|-------------------------|-----------|-----------|
|                  |                  |                | X                       | Y         | Z         |
| 1                | 6                | 0              | -0.015367               | 0.008300  | 0.005048  |
| 2                | 6                | 0              | 0.935219                | -1.037997 | 0.591535  |
| 3                | 8                | 0              | 2.282242                | -0.777199 | 0.222815  |
| 4                | 6                | 0              | 2.838285                | 0.642344  | 0.725460  |
| 5                | 6                | 0              | 1.893399                | 1.676236  | 0.099242  |
| 6                | 6                | 0              | 0.413491                | 1.421355  | 0.426733  |
| 7                | 1                | 0              | -0.220603               | 2.173669  | -0.058806 |
| 8                | 1                | 0              | 0.255012                | 1.535961  | 1.509199  |
| 9                | 1                | 0              | 2.061913                | 1.662105  | -0.985617 |
| 10               | 1                | 0              | 2.206194                | 2.664025  | 0.459965  |
| 11               | 1                | 0              | 2.644234                | 0.557382  | 1.820199  |
| 12               | 8                | 0              | 4.100836                | 0.716480  | 0.382812  |
| 13               | 11               | 0              | 4.291474                | -1.179094 | -0.516043 |
| 14               | 1                | 0              | 0.845992                | -1.044151 | 1.692294  |
| 15               | 1                | 0              | 0.682798                | -2.045598 | 0.236717  |
| 16               | 1                | 0              | 0.000686                | -0.073302 | -1.090430 |
| 17               | 1                | 0              | -1.042135               | -0.203445 | 0.332716  |

-----  
 Electronic Energy = -508.75507622 Zero-Point Energy = 0.137994

**CH<sub>3</sub>OCH<sub>3</sub> (M = Na, R = THP)**

| Center<br>Number | Atomic<br>Number | Atomic<br>Type | Coordinates (Angstroms) |           |          |
|------------------|------------------|----------------|-------------------------|-----------|----------|
|                  |                  |                | X                       | Y         | Z        |
| 1                | 6                | 0              | 0.016461                | 0.006851  | 0.010759 |
| 2                | 8                | 0              | -0.018126               | -0.001046 | 1.425528 |
| 3                | 6                | 0              | 1.272169                | -0.001710 | 2.004672 |
| 4                | 1                | 0              | 1.141321                | -0.006315 | 3.089283 |
| 5                | 1                | 0              | 1.846278                | -0.893950 | 1.708405 |

|   |   |   |           |           |           |
|---|---|---|-----------|-----------|-----------|
| 6 | 1 | 0 | 1.844066  | 0.894414  | 1.715772  |
| 7 | 1 | 0 | 0.528625  | -0.885043 | -0.383383 |
| 8 | 1 | 0 | -1.019064 | 0.005979  | -0.336842 |
| 9 | 1 | 0 | 0.525163  | 0.904382  | -0.374824 |

-----  
Electronic Energy = -155.04131200

Zero-Point Energy = 0.079631

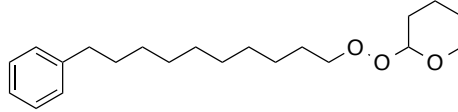

10b

Filename: c:\program files\pyris\data\ksh08-65.stad  
Operator ID:  
Sample ID: ksh08-65  
Sample Weight: 18.923 mg  
Comment:

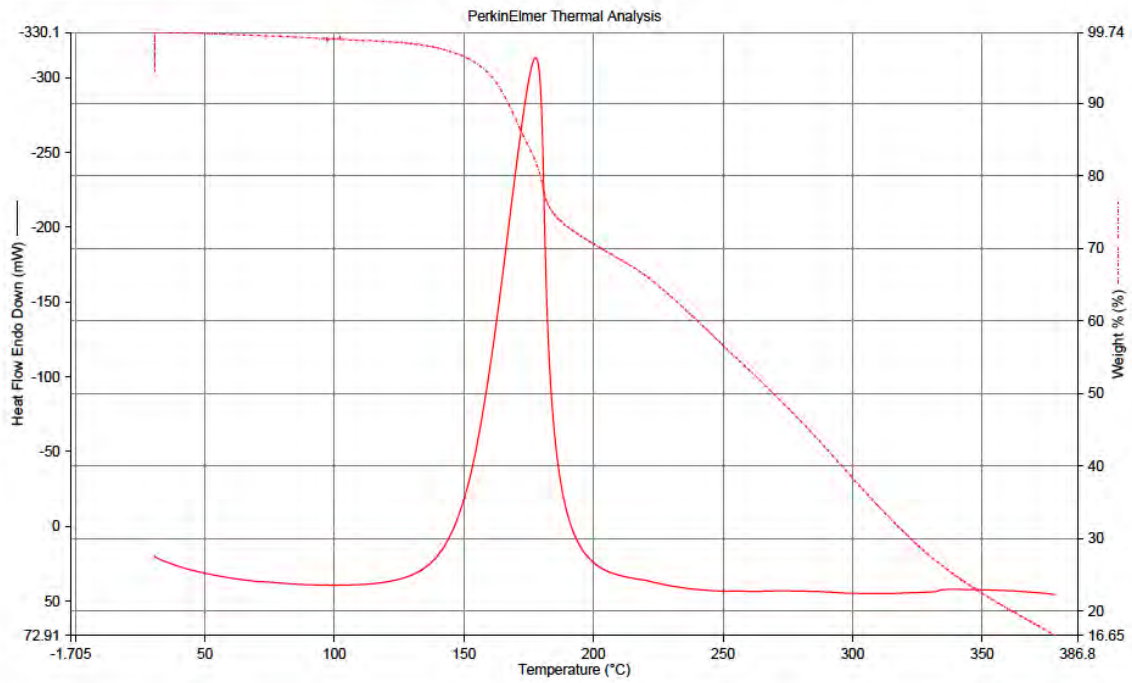

1/7/2015 5:54:19 PM

1) Heat from 30.00°C to 400.00°C at 40.00°C/min

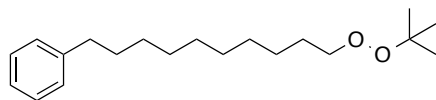

10a

Filename: C:\Program Files\PerkinElmer\THERMOANALYSIS\150107181059.stad  
Operator ID:  
Sample ID: ksk09-32  
Sample Weight: 20.720 mg  
Comment:

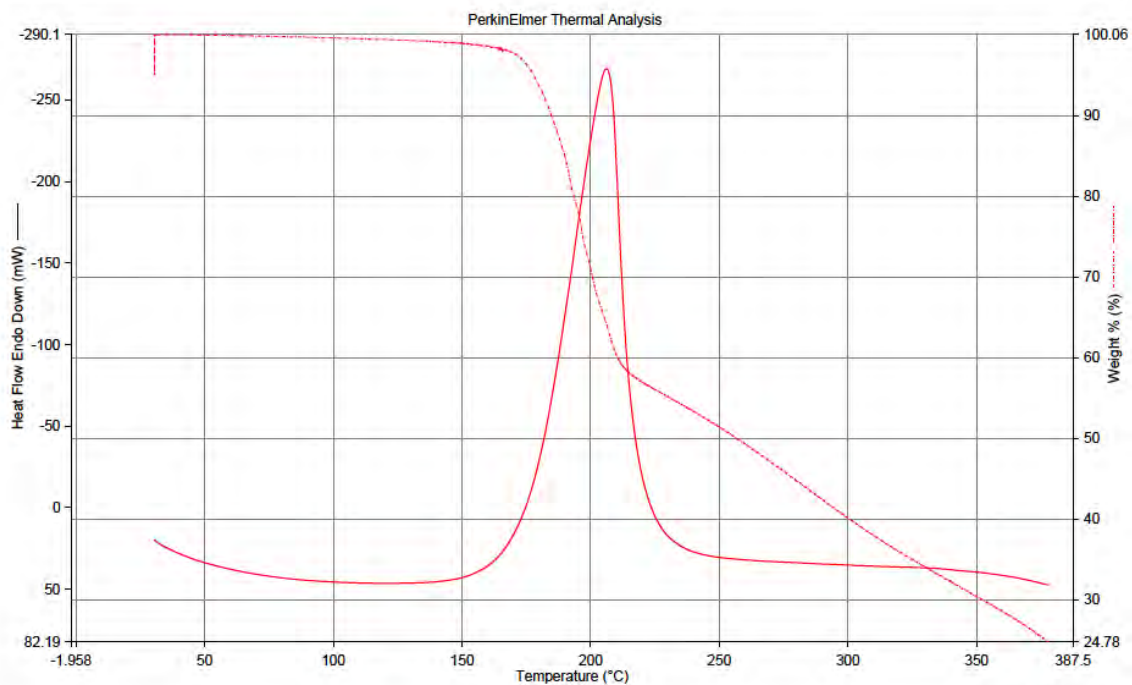

1/7/2015 6:34:23 PM

1) Heat from 30.00°C to 400.00°C at 40.00°C/min

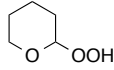

ksk10-09  
CDCl<sub>3</sub>, 1H  
300 MHz

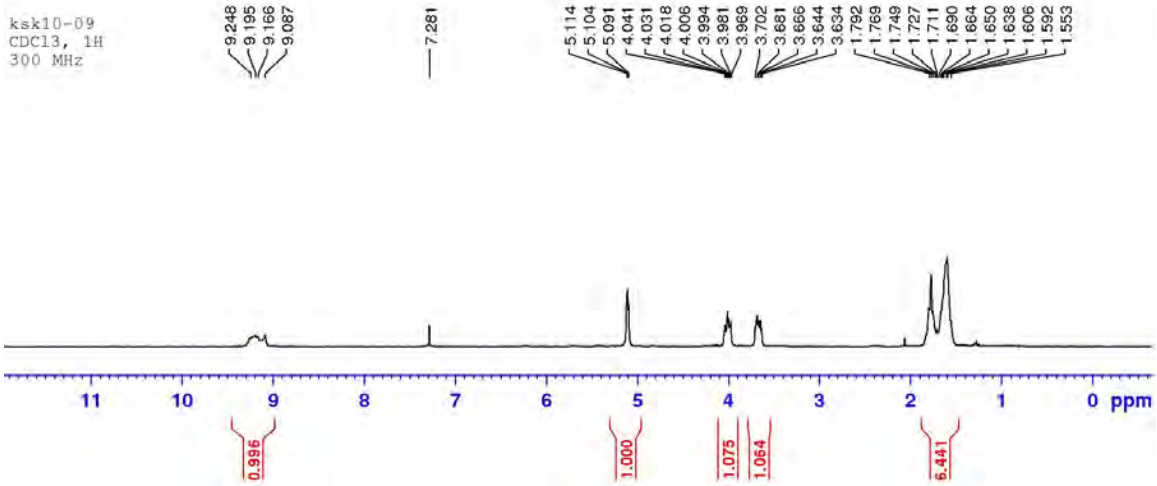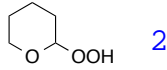

ksk10-09  
CDCl<sub>3</sub>, 13C  
75 MHz

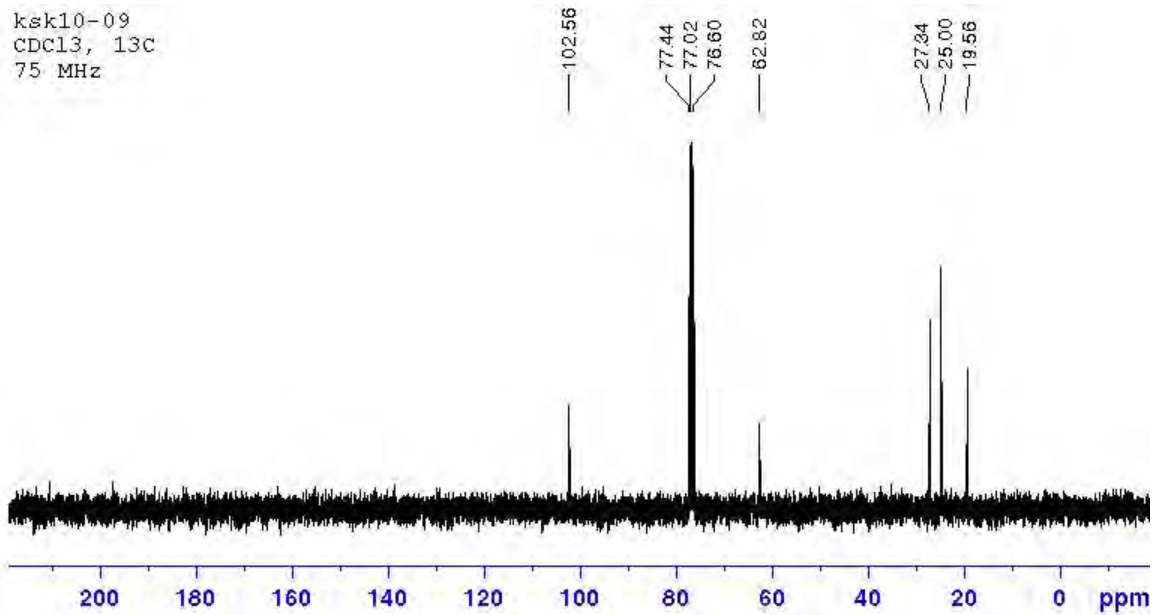



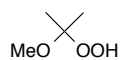

ksk07-61  
CDCl<sub>3</sub>, 1H  
300 MHz

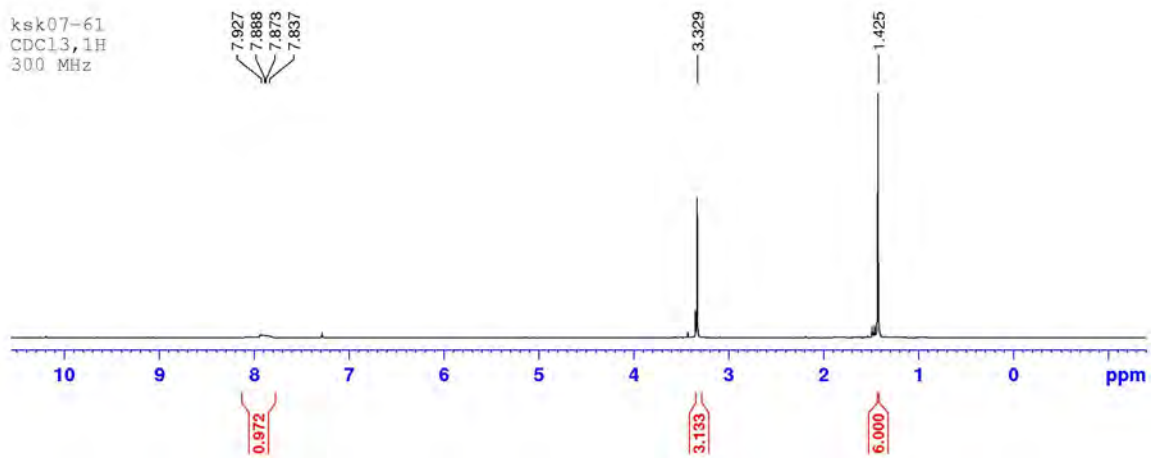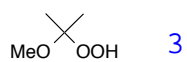

ksk07-61  
CDCl<sub>3</sub>, 13C  
75 MHz

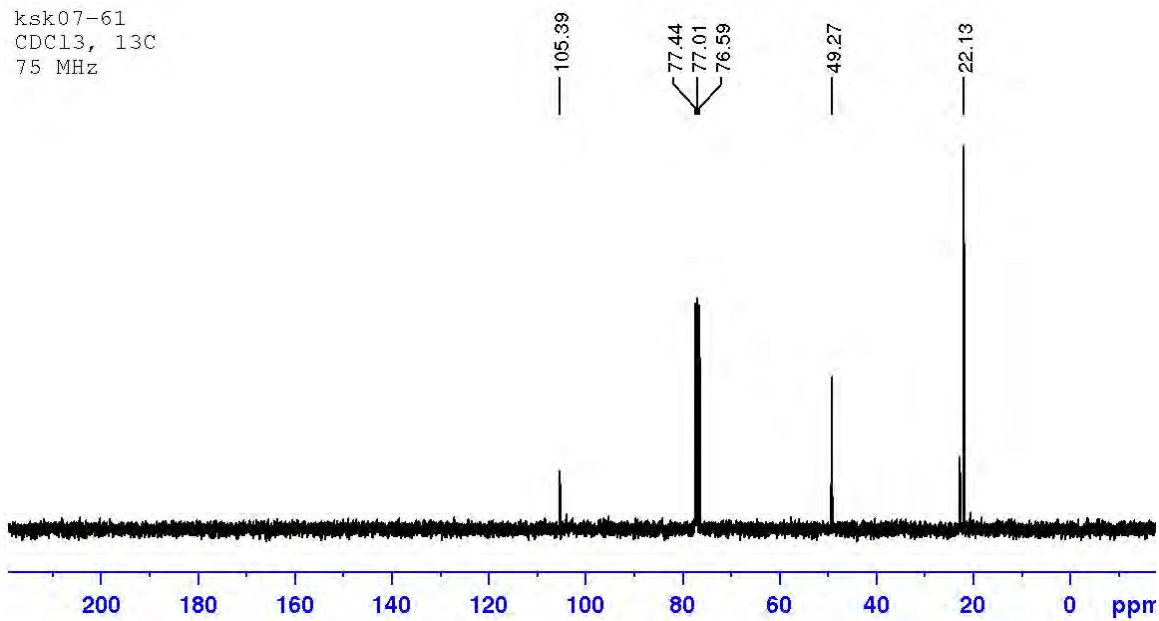

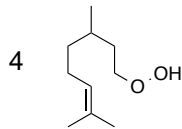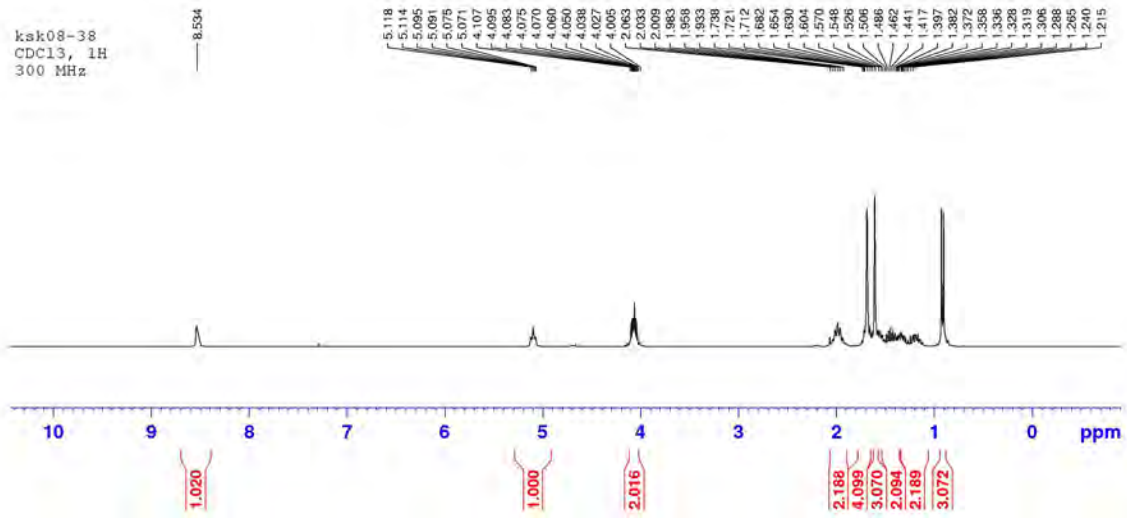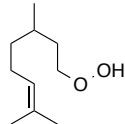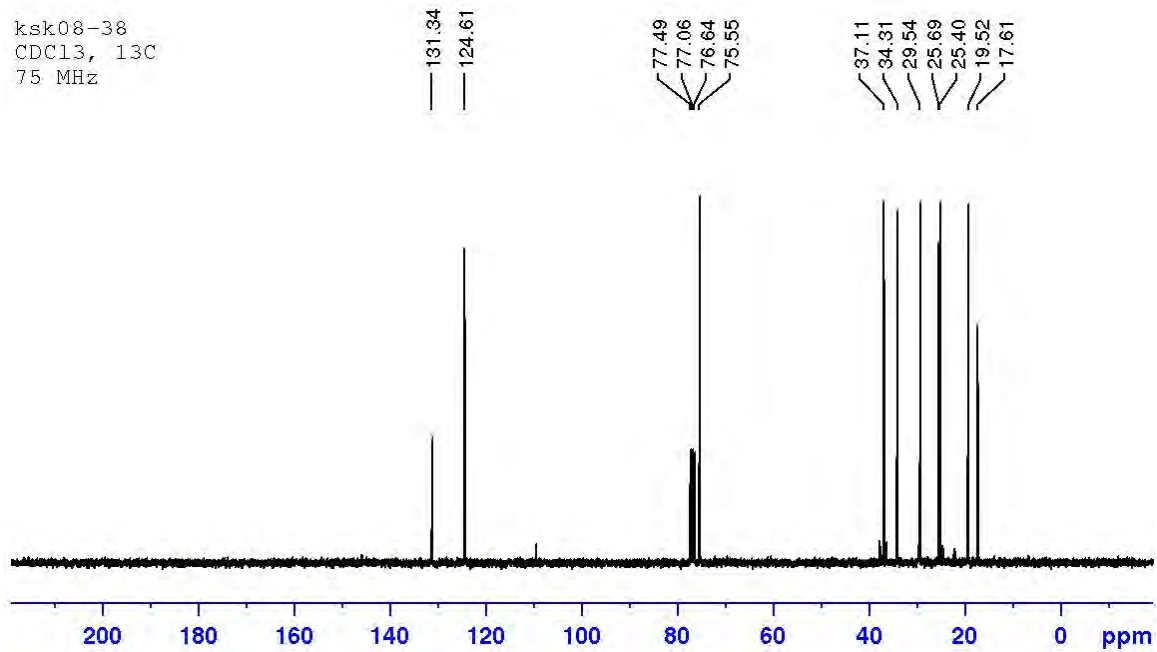

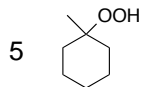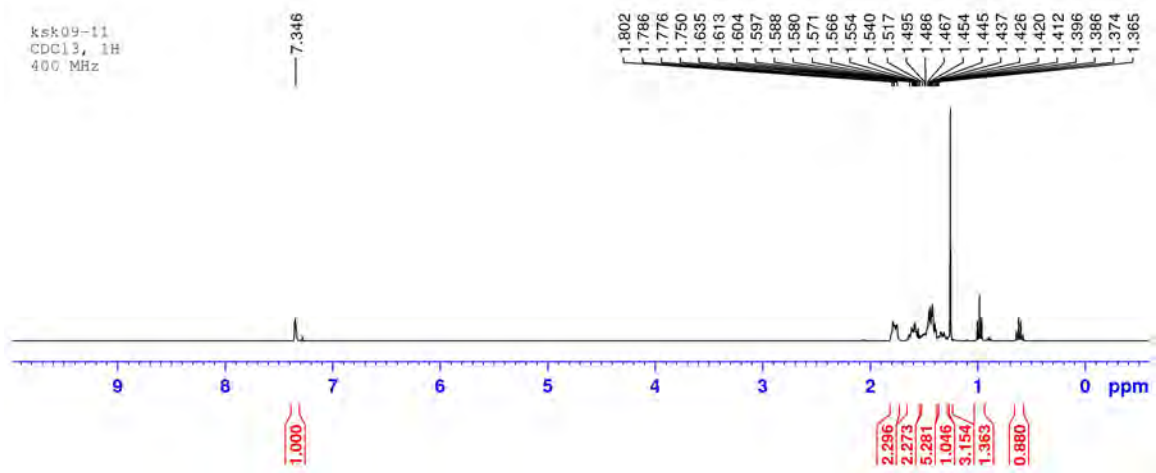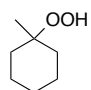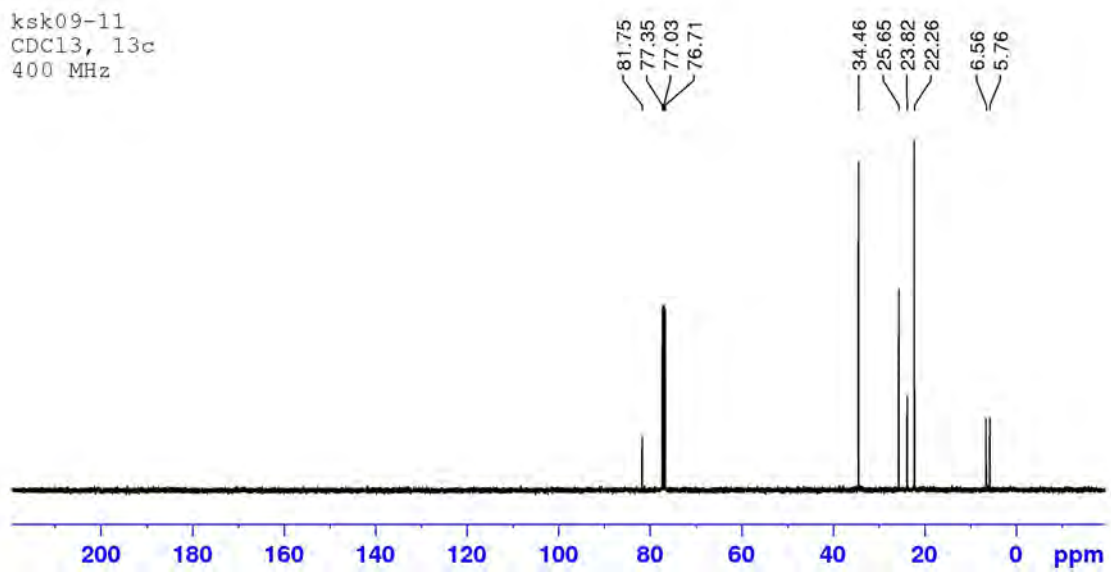

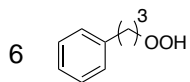

ksk10-58  
CDCl<sub>3</sub>, <sup>1</sup>H  
400 MHz

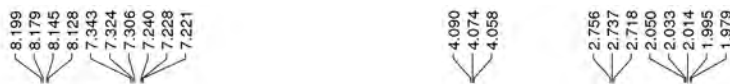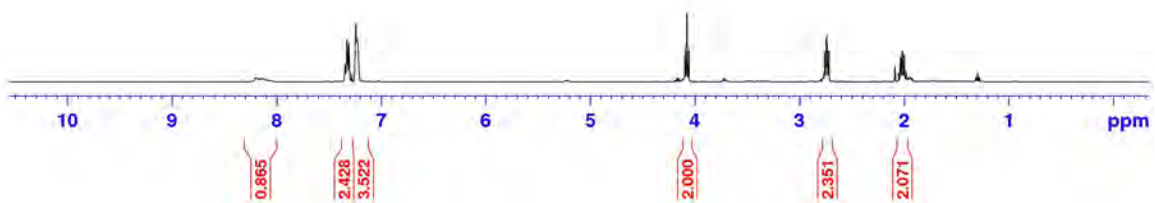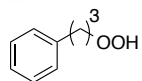

ksk10-58  
CDCl<sub>3</sub>, <sup>13</sup>C  
100 MHz

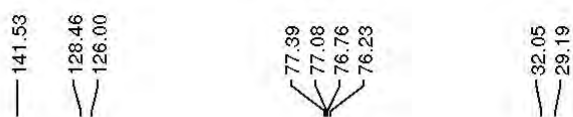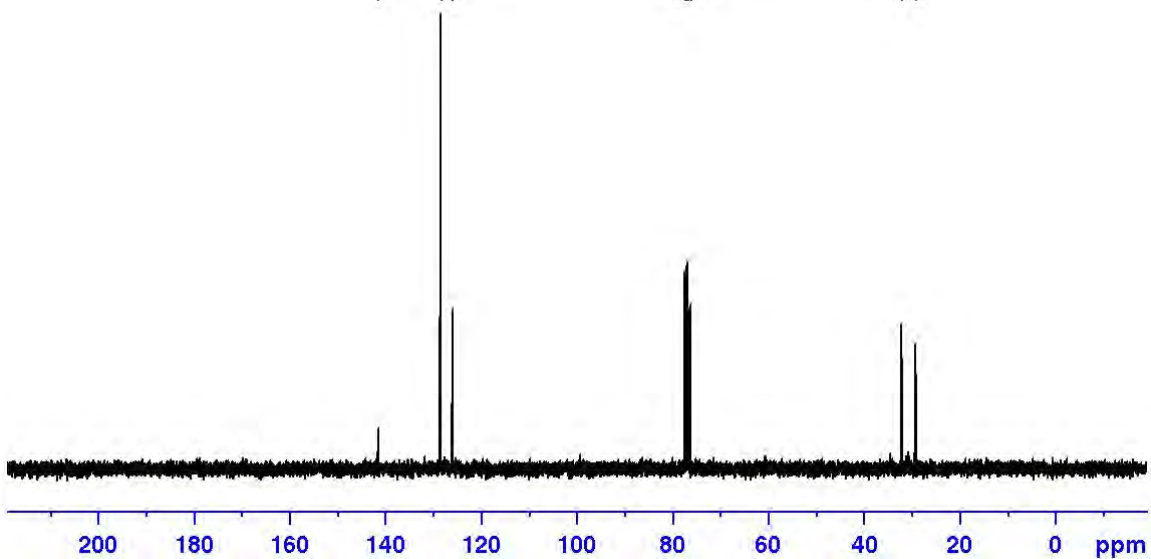

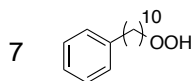

ksk08-71  
CDCl<sub>3</sub>, <sup>1</sup>H  
300 MHz

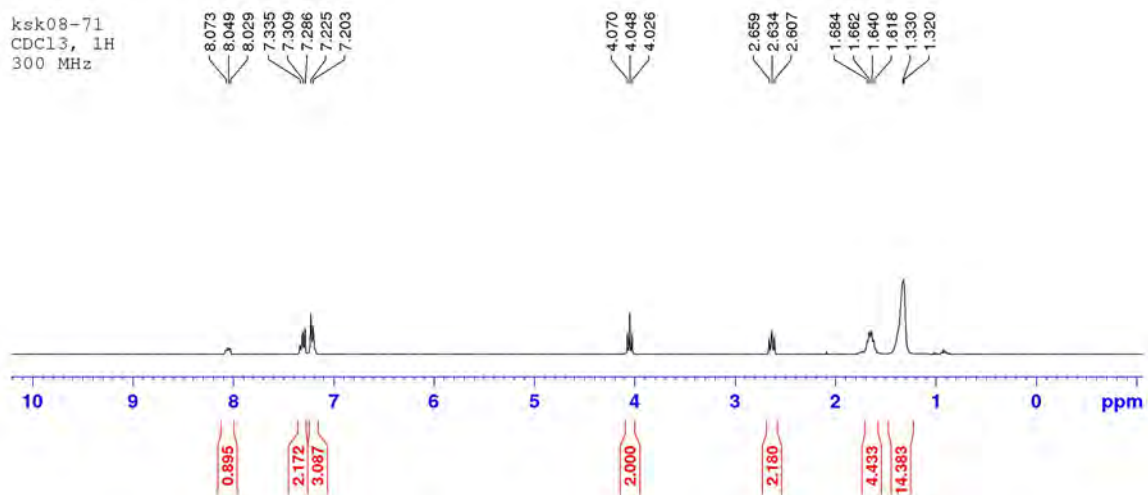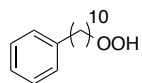

ksk08-71  
CDCl<sub>3</sub>, <sup>13</sup>C  
75 MHz

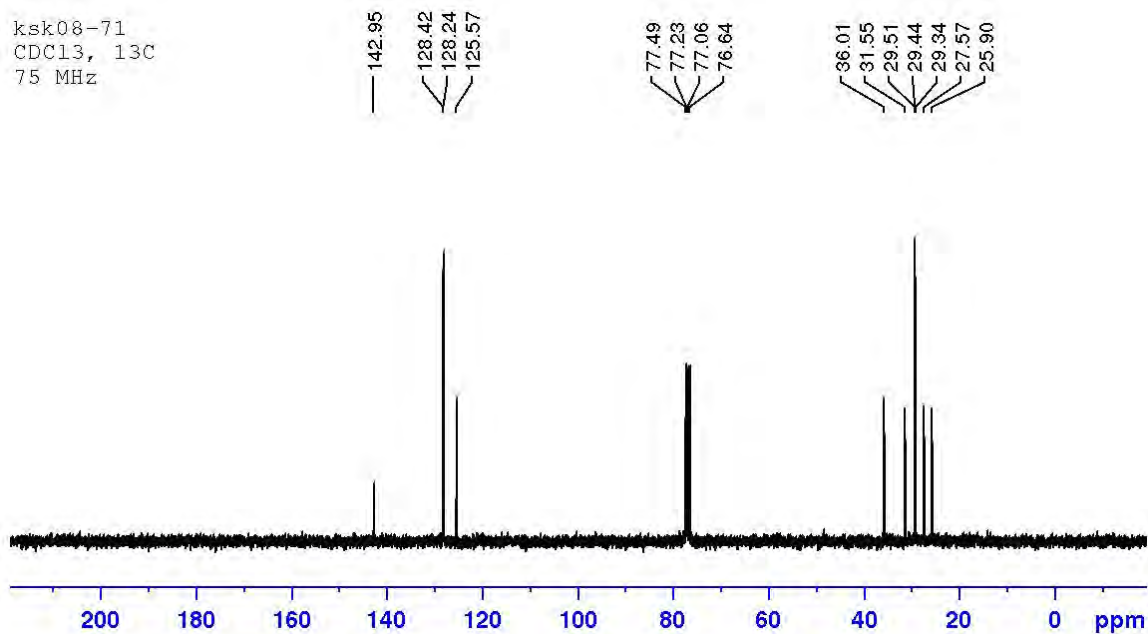

8a

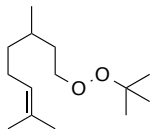

ksk08-46  
CDCl<sub>3</sub>, 1H  
400 MHz

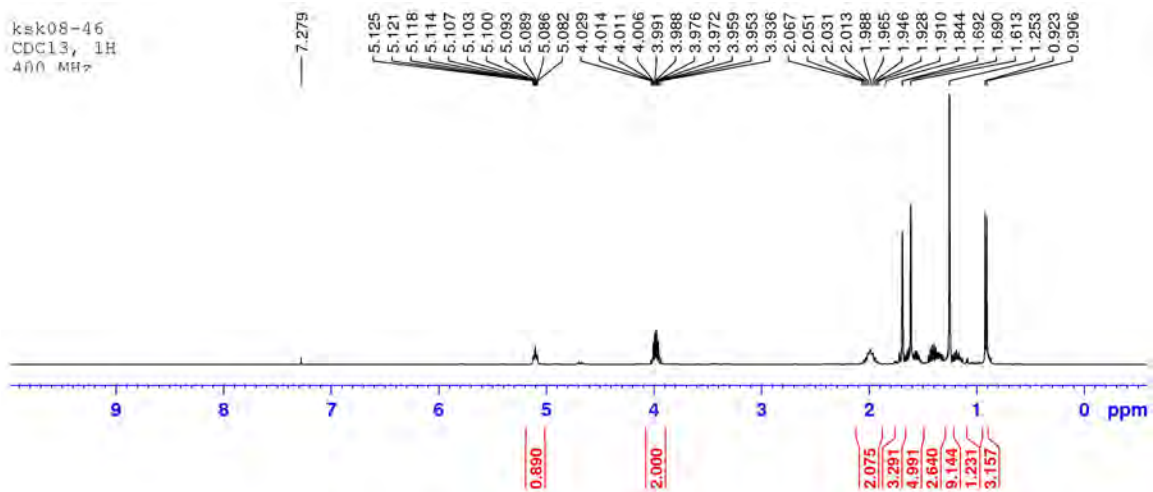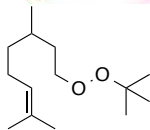

ksk08-46  
CDCl<sub>3</sub>, 13C  
100 MHz

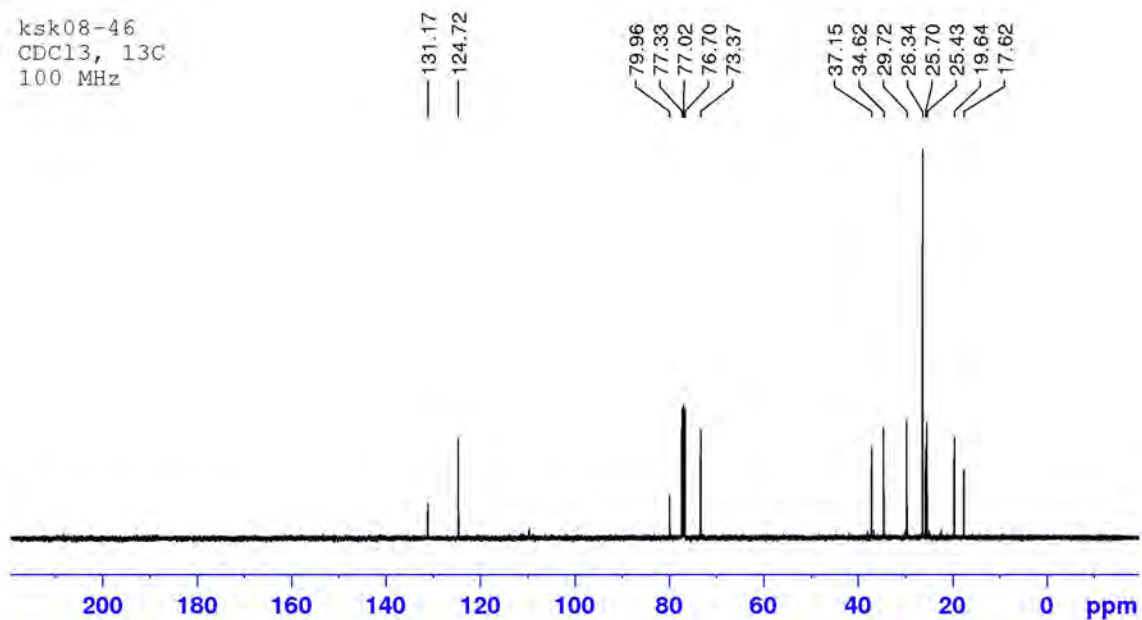

8b

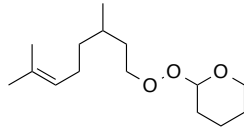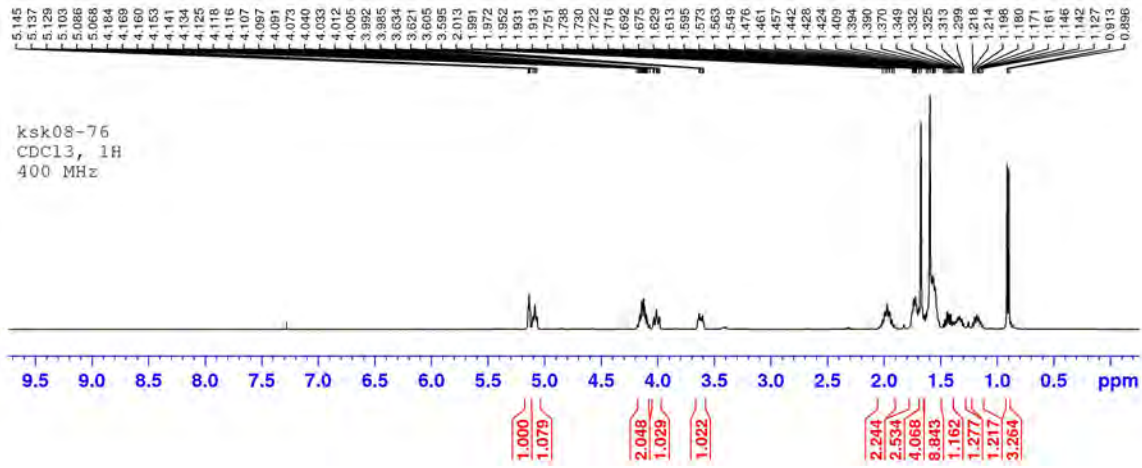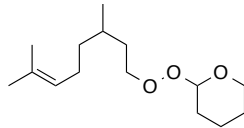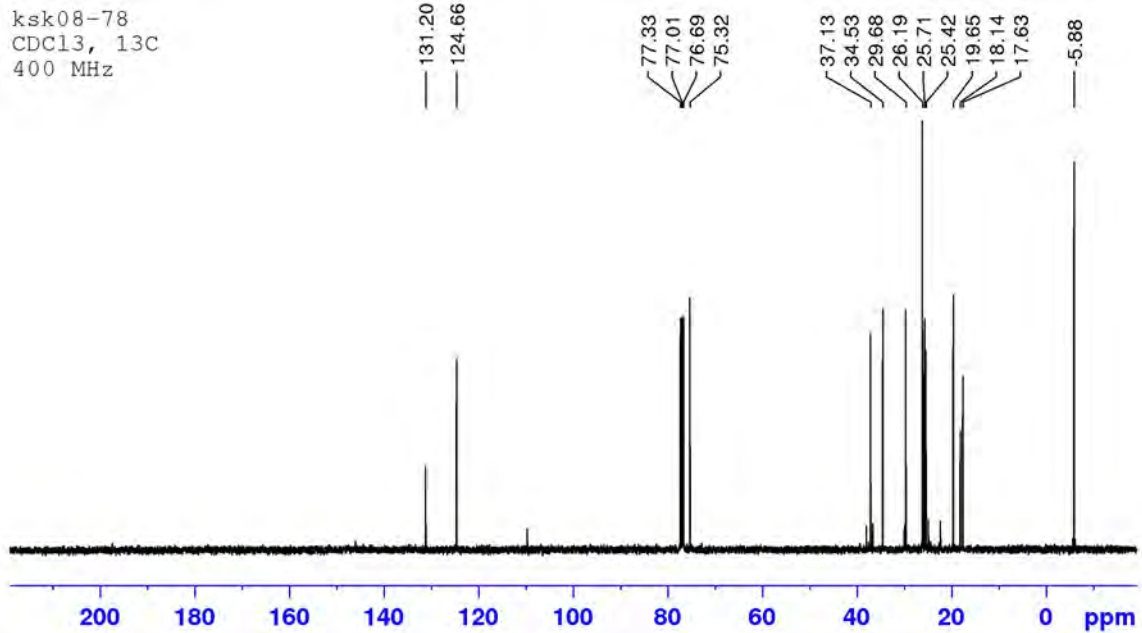

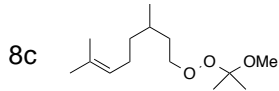

ksk07-90  
CDCl<sub>3</sub>, 1H  
400 MHz

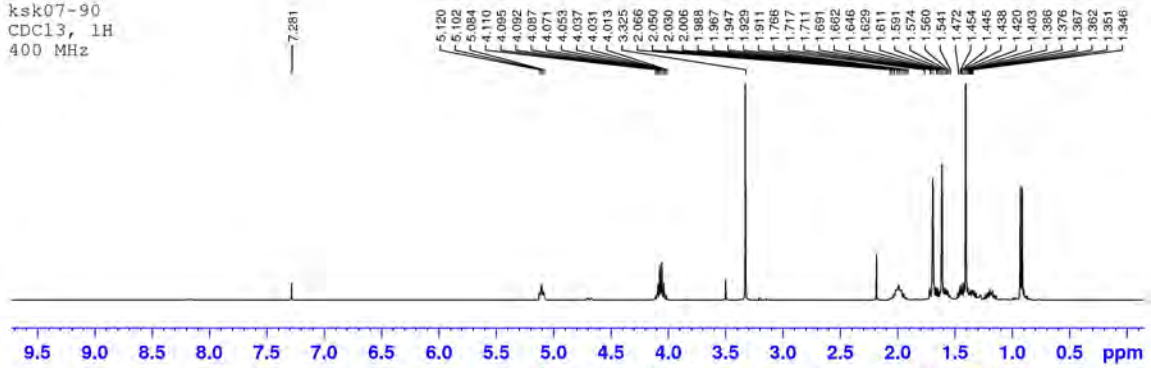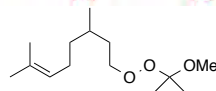

ksk07-90  
CDCl<sub>3</sub>, 13C  
100 MHz

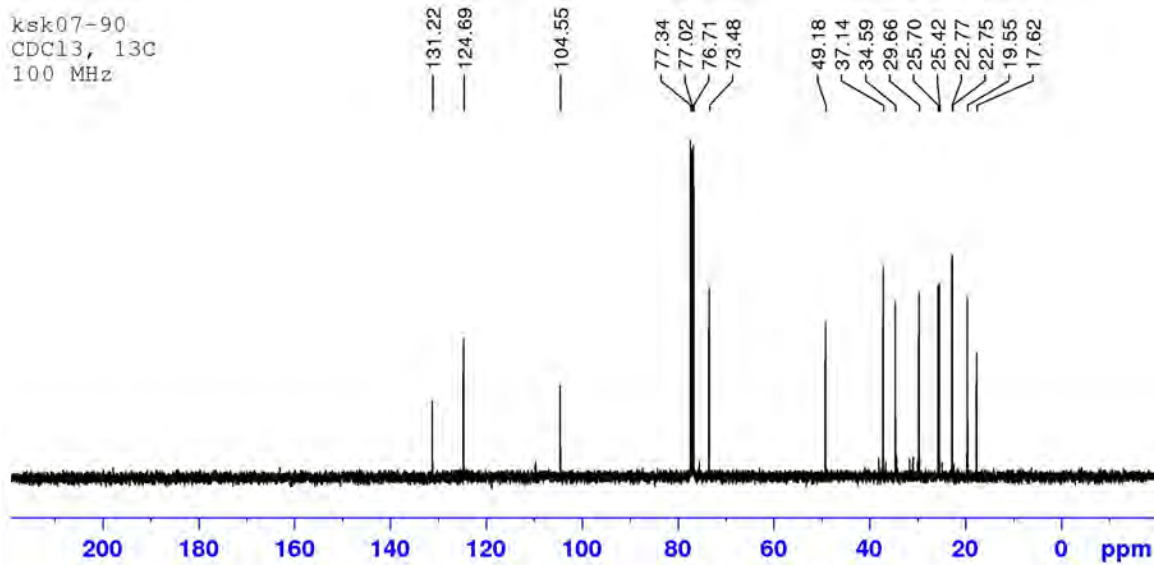



8d

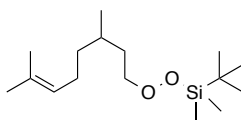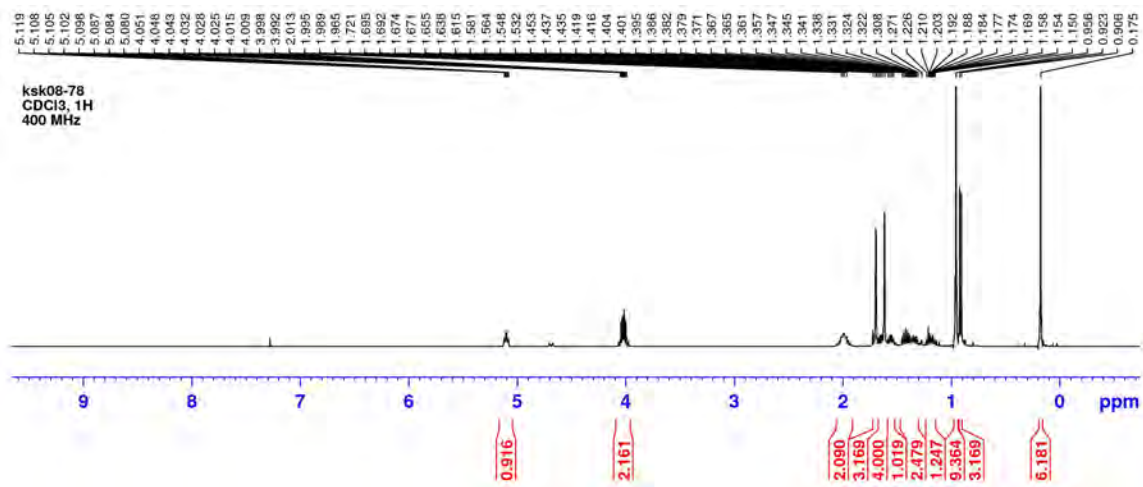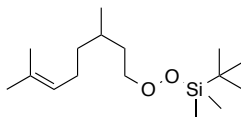

ksk08-78  
CDCl<sub>3</sub>, 13C  
400 MHz

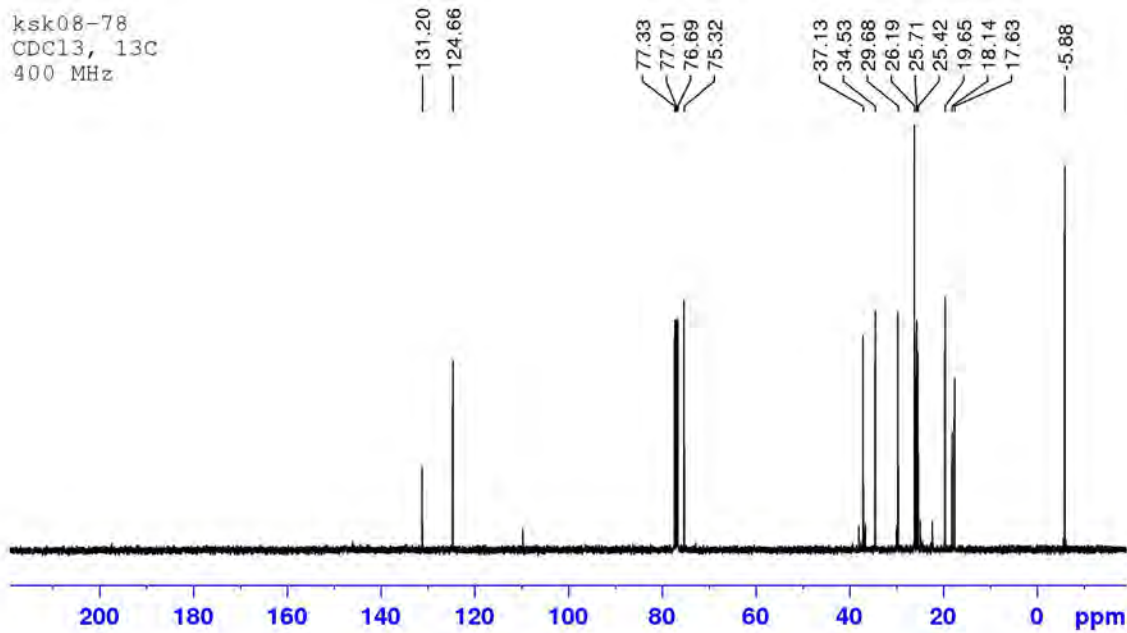

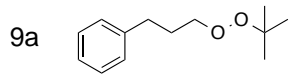

ksk09-53  
CDCl<sub>3</sub>, 1H  
400 MHz

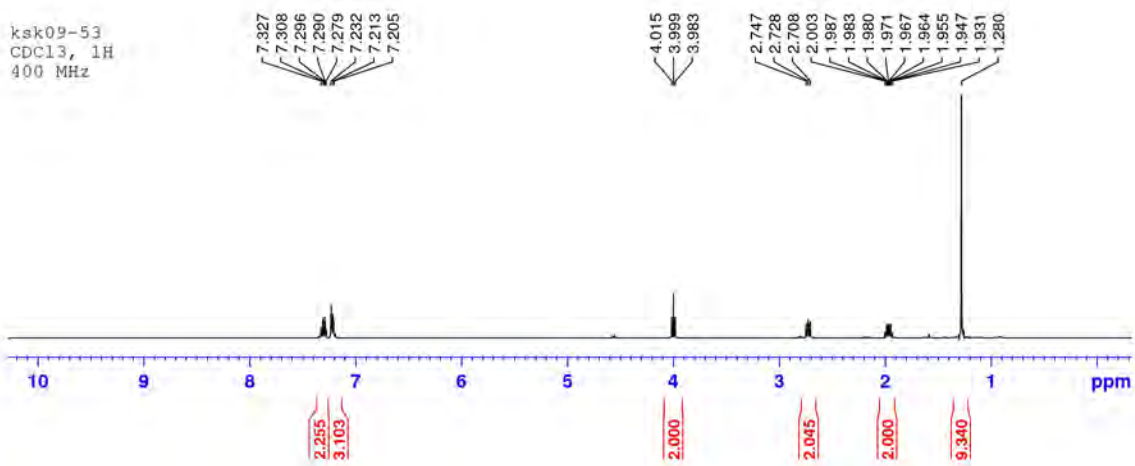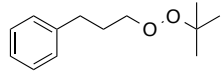

ksk09-53  
CDCl<sub>3</sub>, 13C  
100 MHz

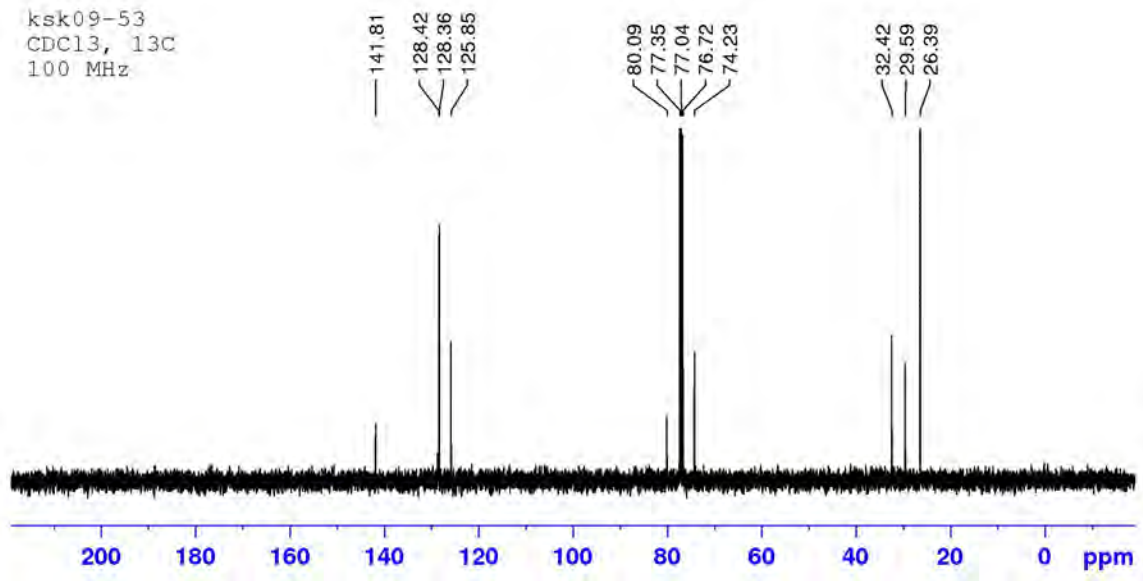

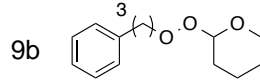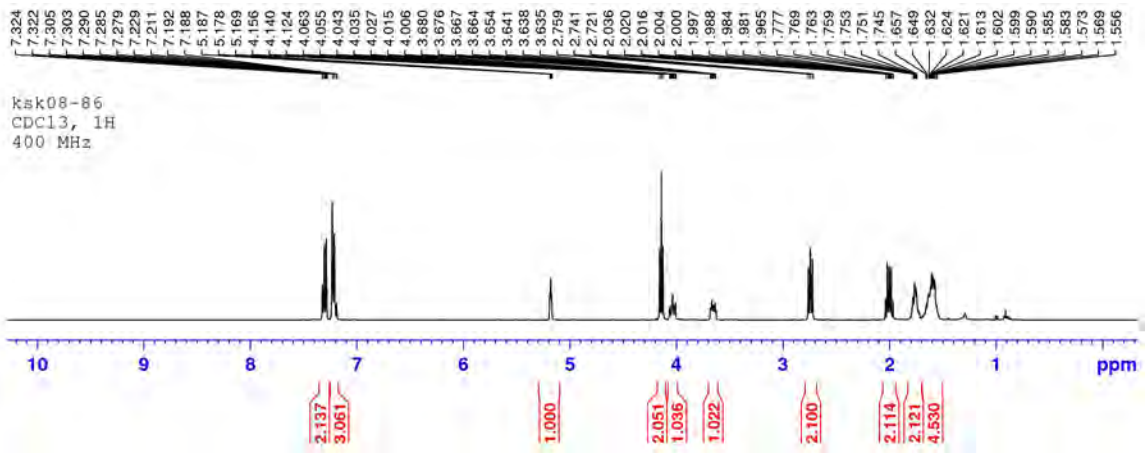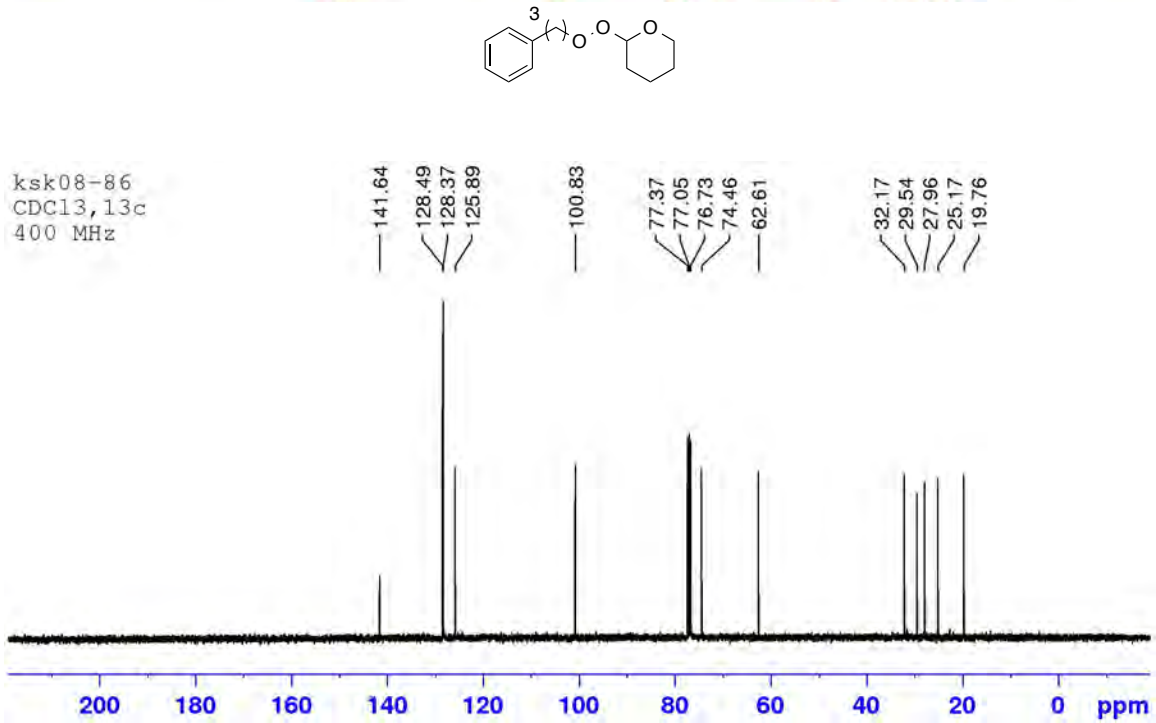

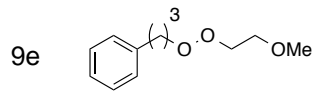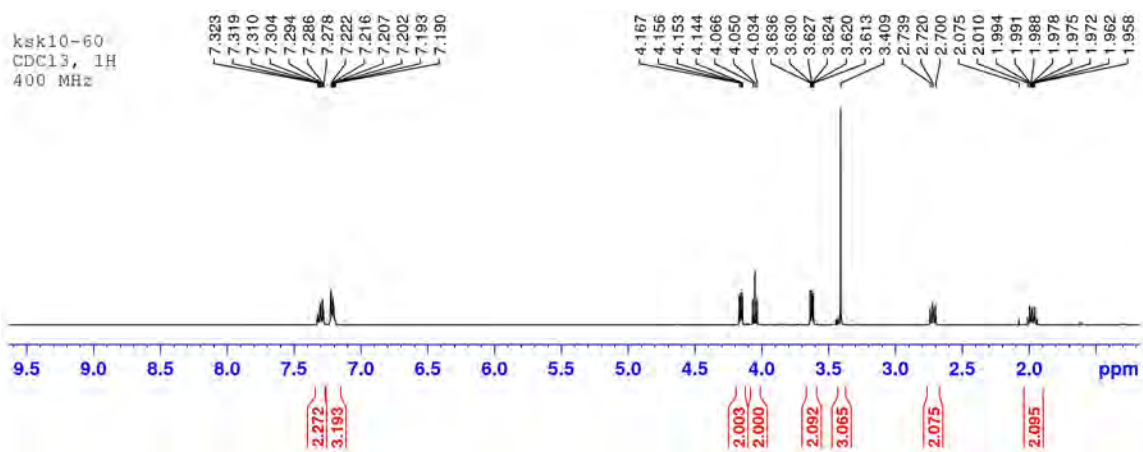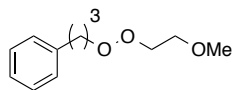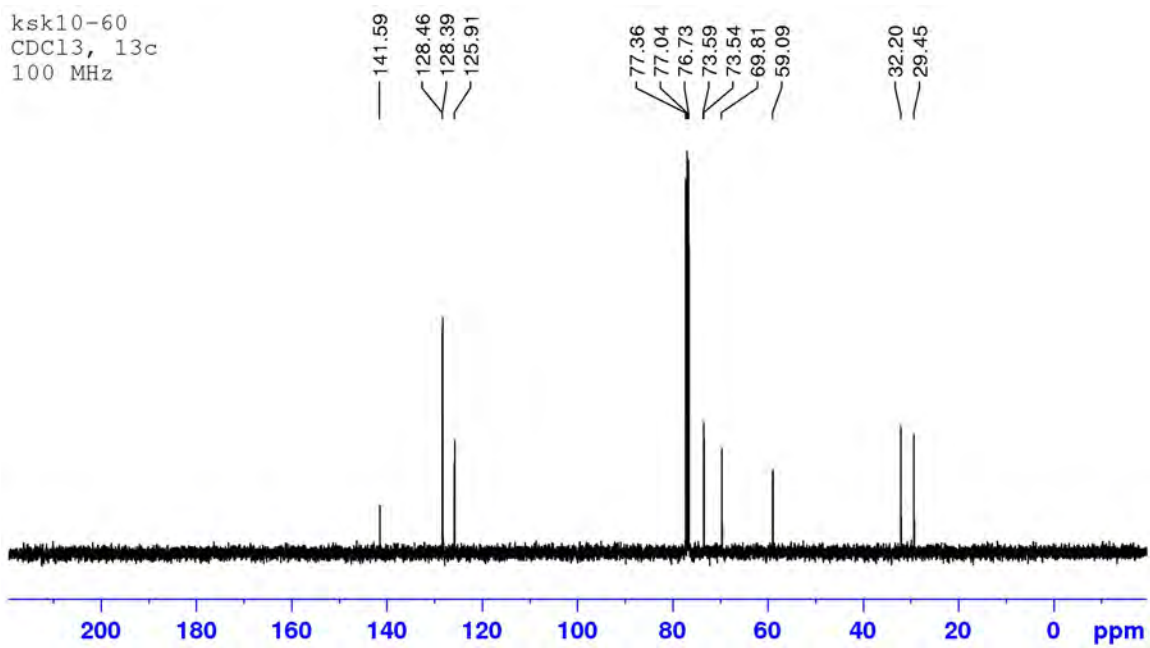

10a

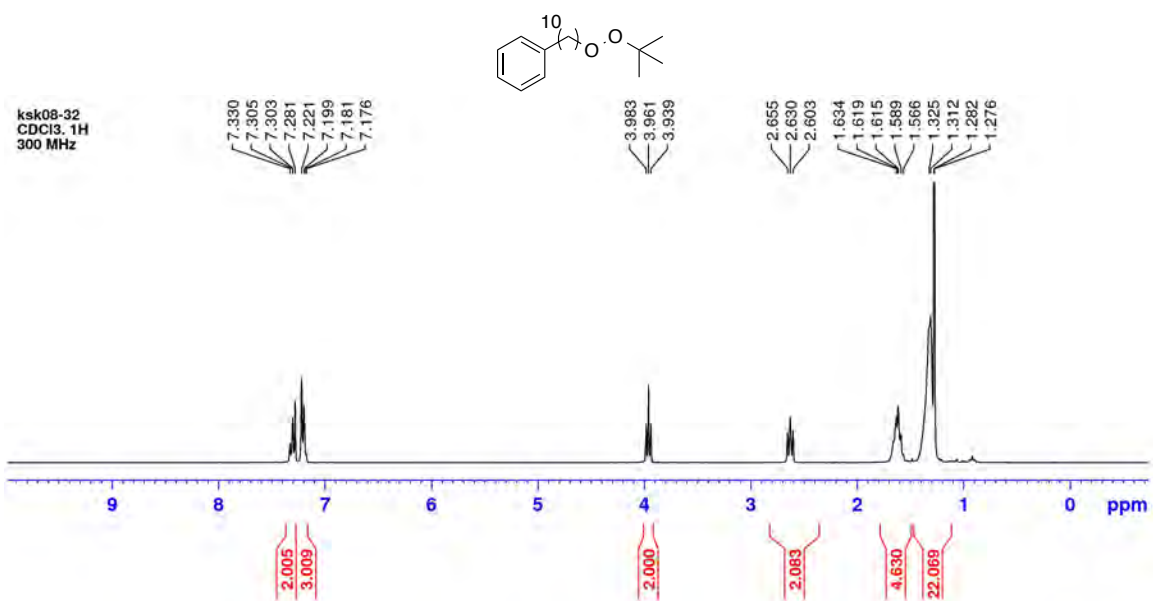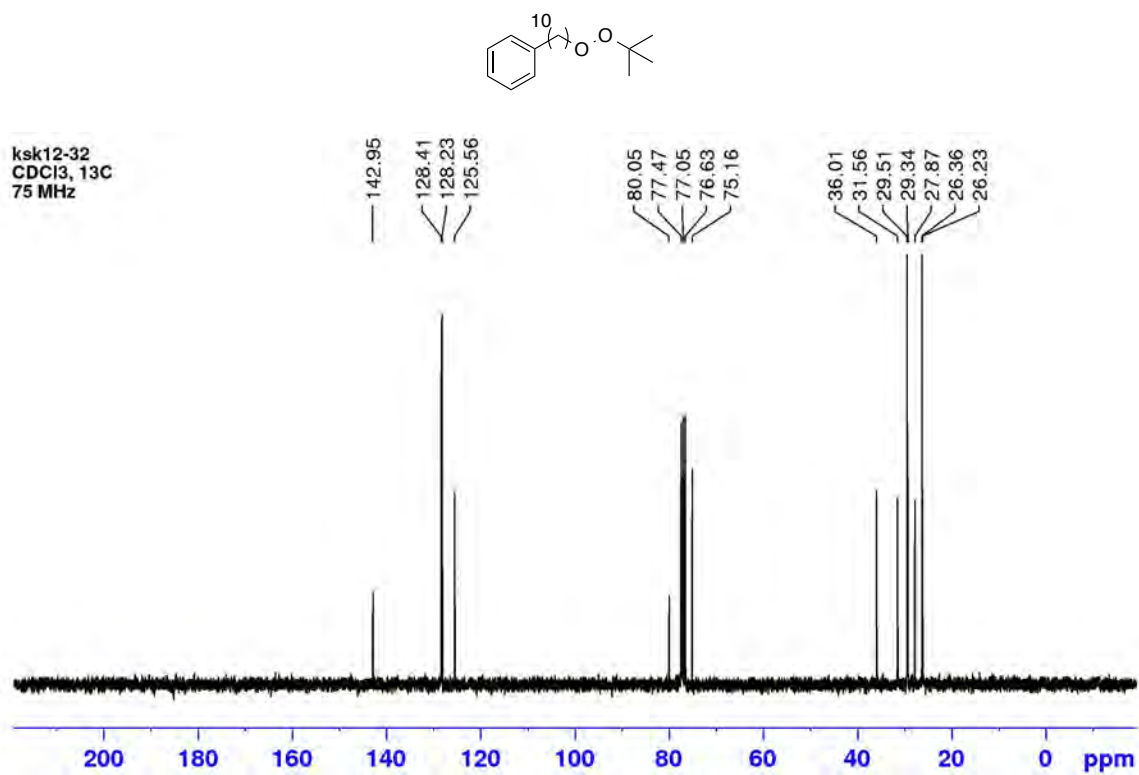

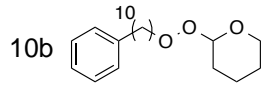

Ksk08-65  
CDCl<sub>3</sub>, <sup>1</sup>H  
300 MHz

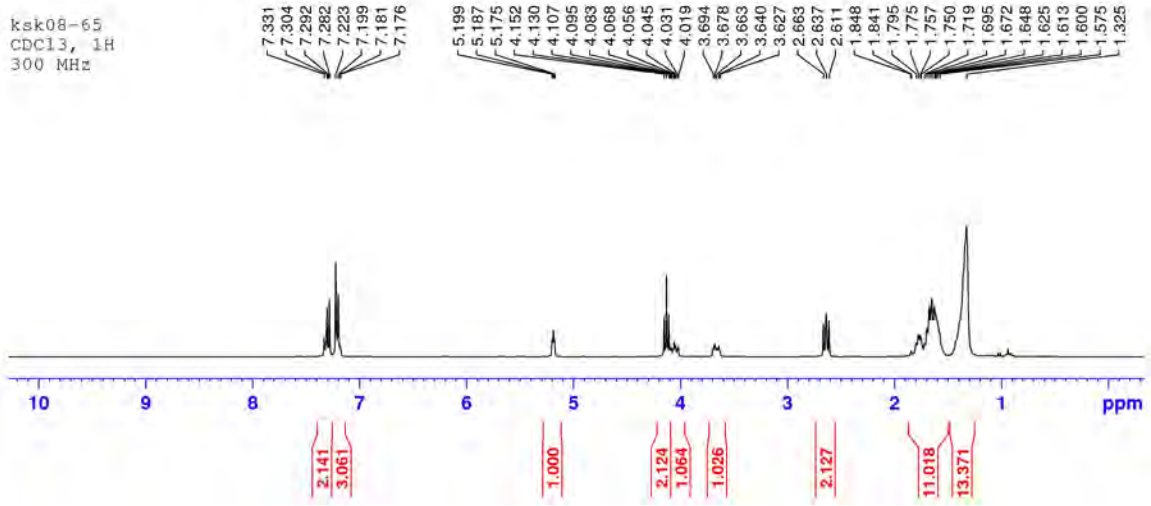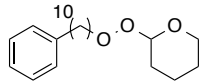

Ksk08-65  
CDCl<sub>3</sub>, <sup>13</sup>C  
75 MHz

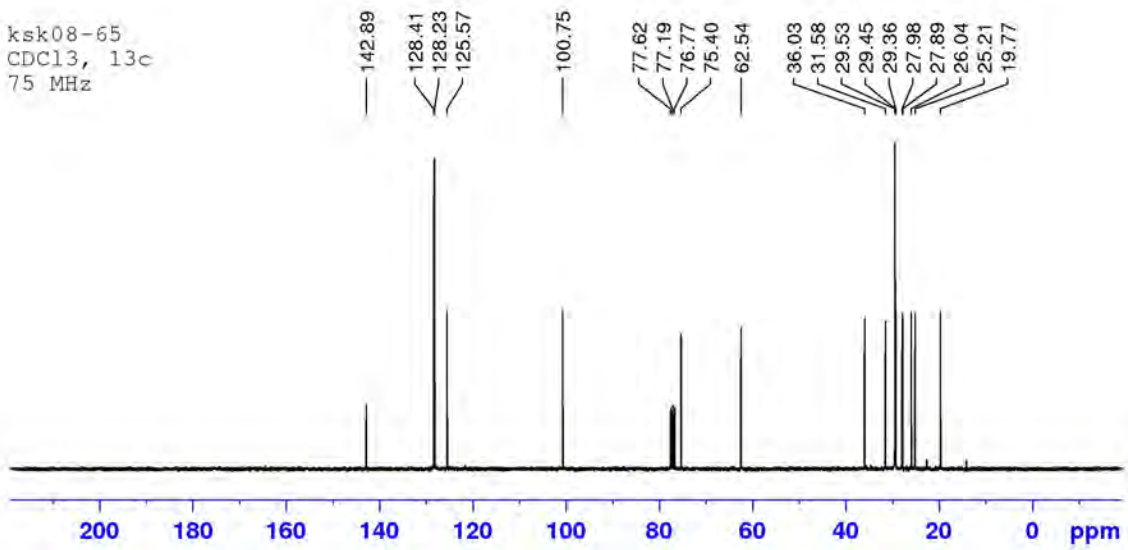

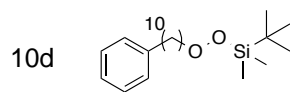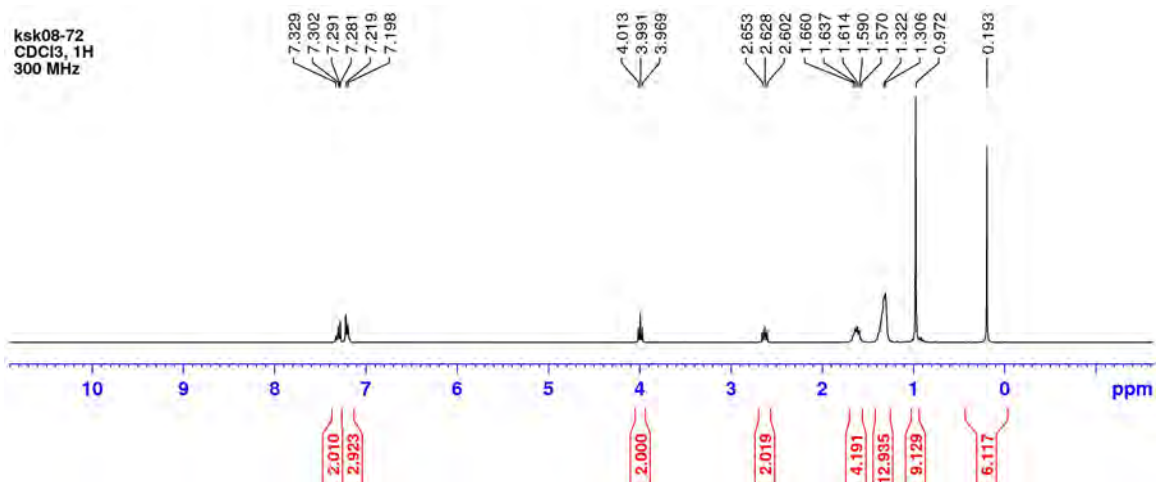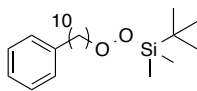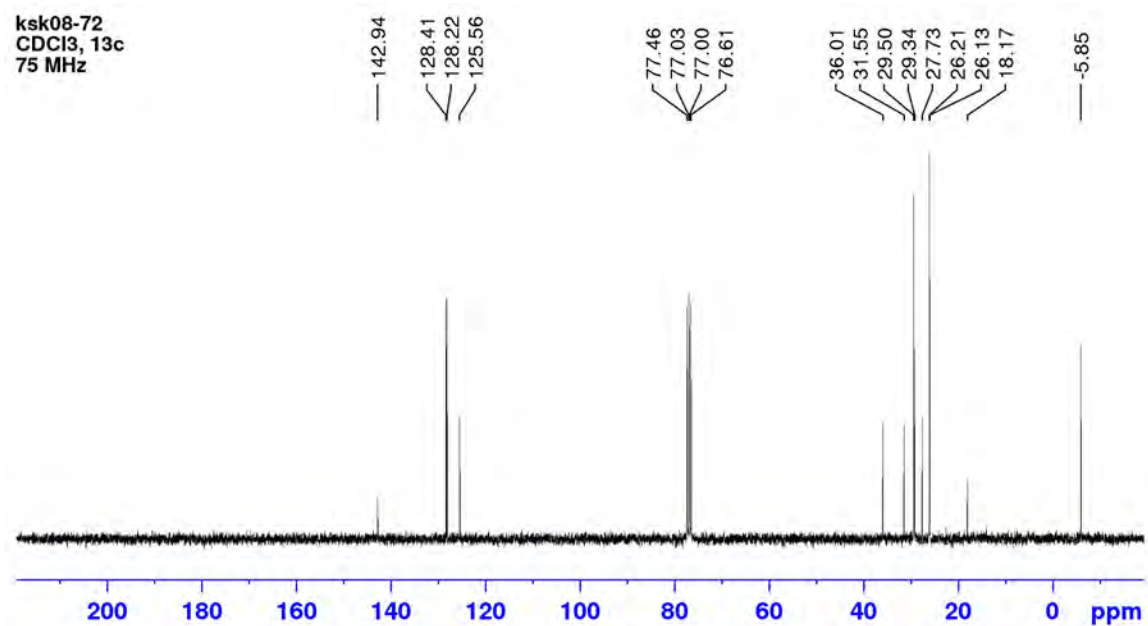

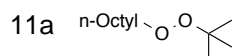

ksk08-06  
CDCl<sub>3</sub>, 1H  
400 MHz

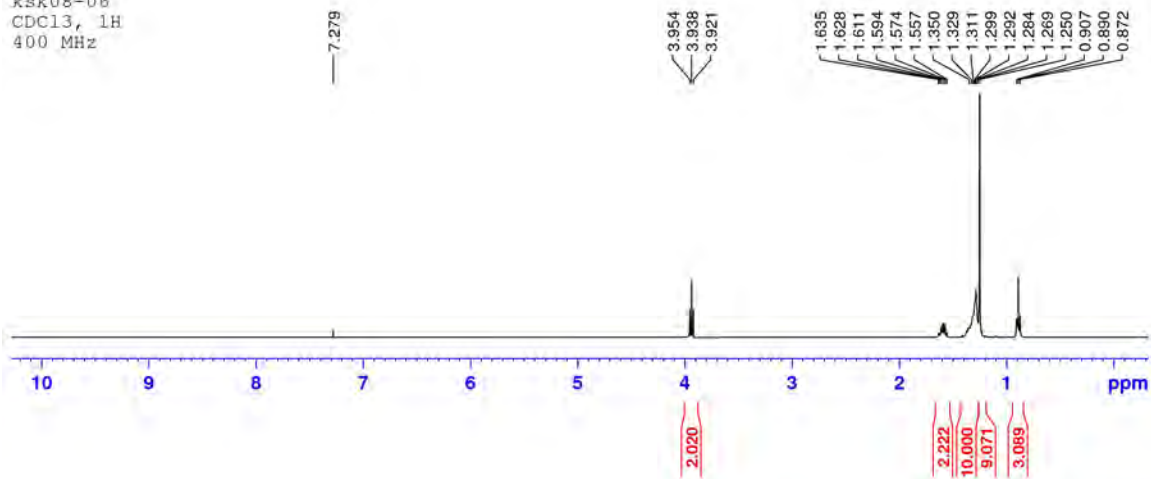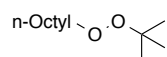

ksk08-06  
CDCl<sub>3</sub>, 13C  
100 MHz

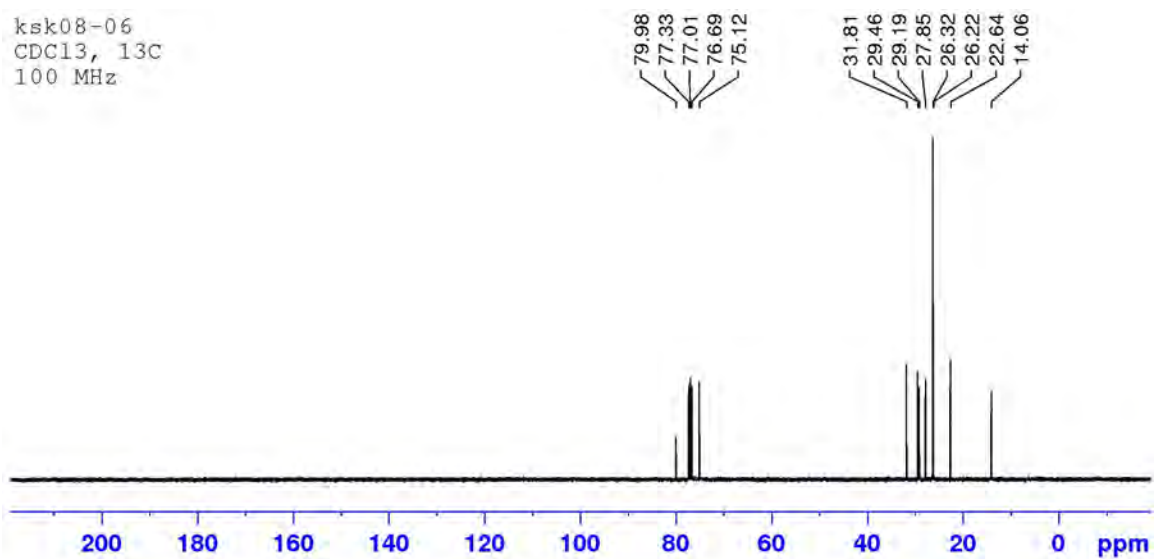



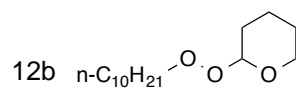

ksk10-43  
CDCl<sub>3</sub>, 1H  
400 MHz

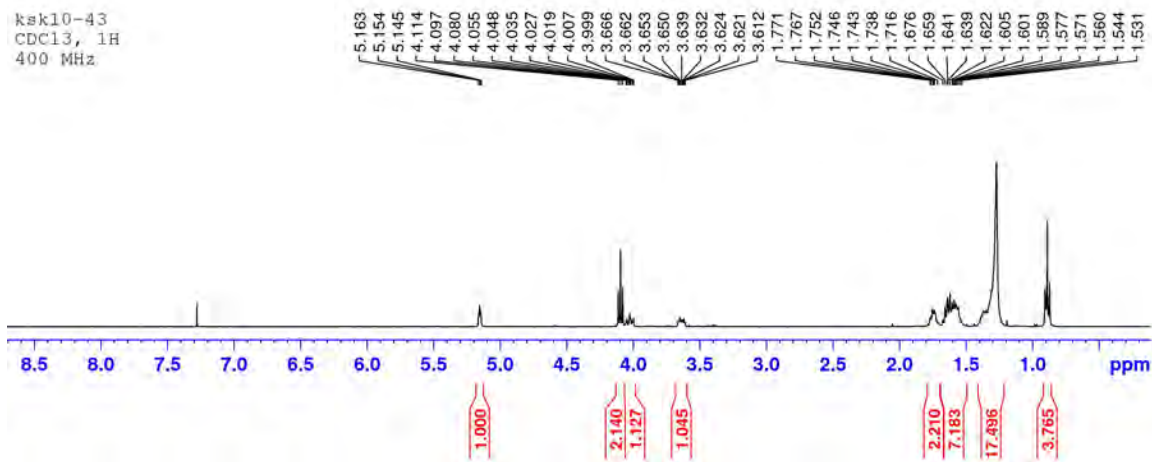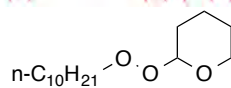

ksk08-65  
CDCl<sub>3</sub>, 13C  
75 MHz

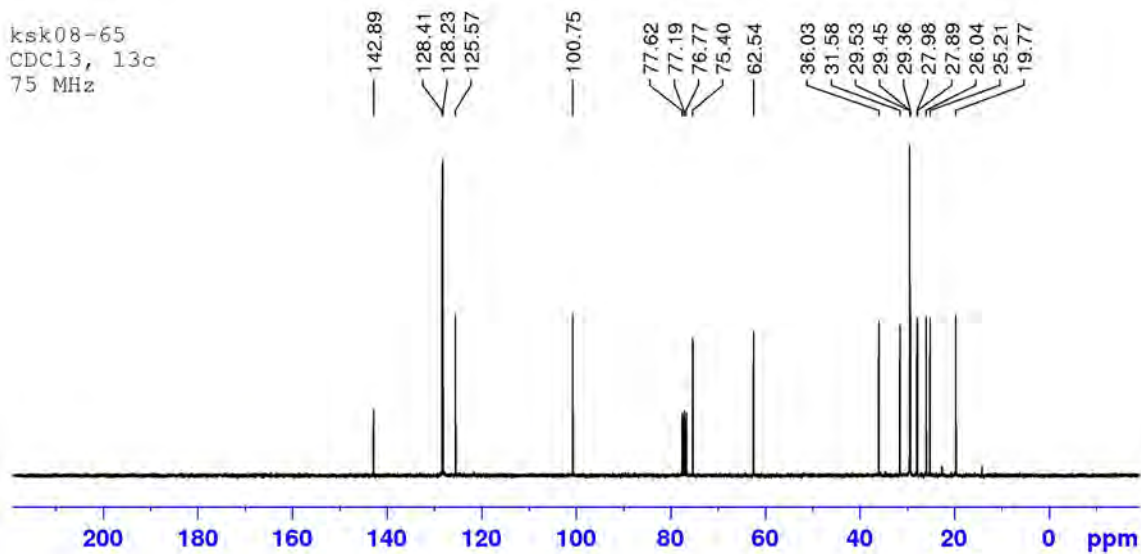

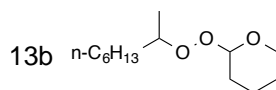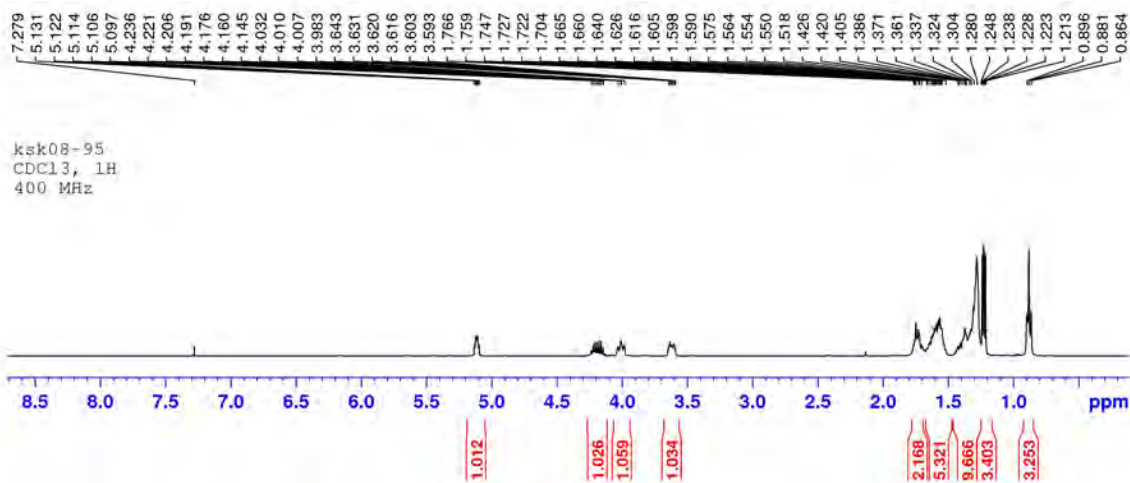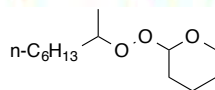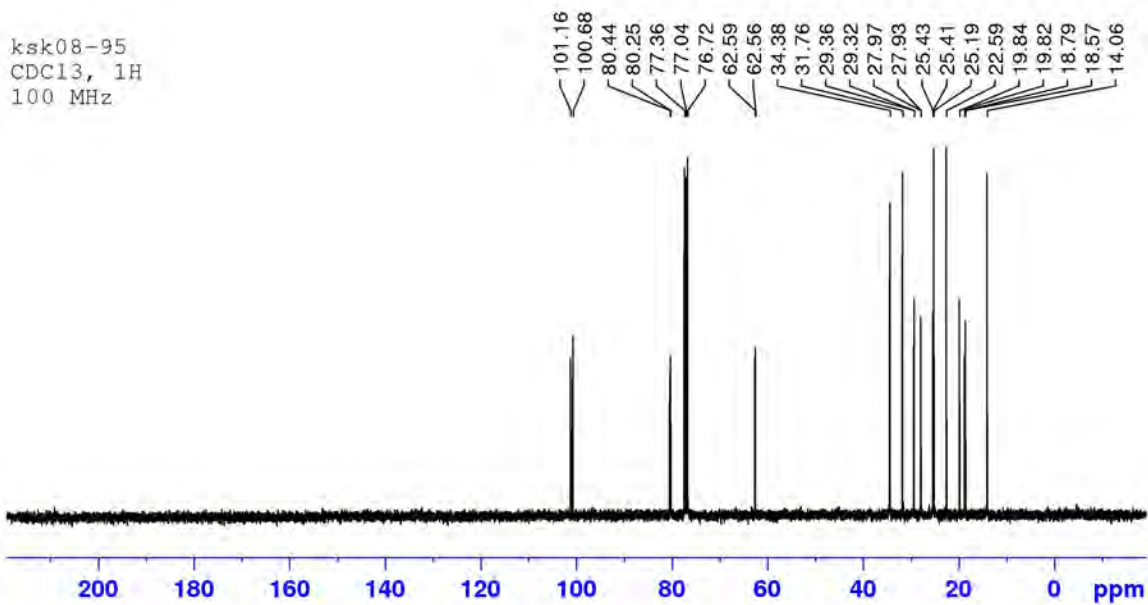

14b

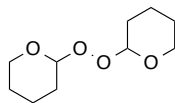

ksk09-19  
CDCl<sub>3</sub>, 1H  
400 MHz

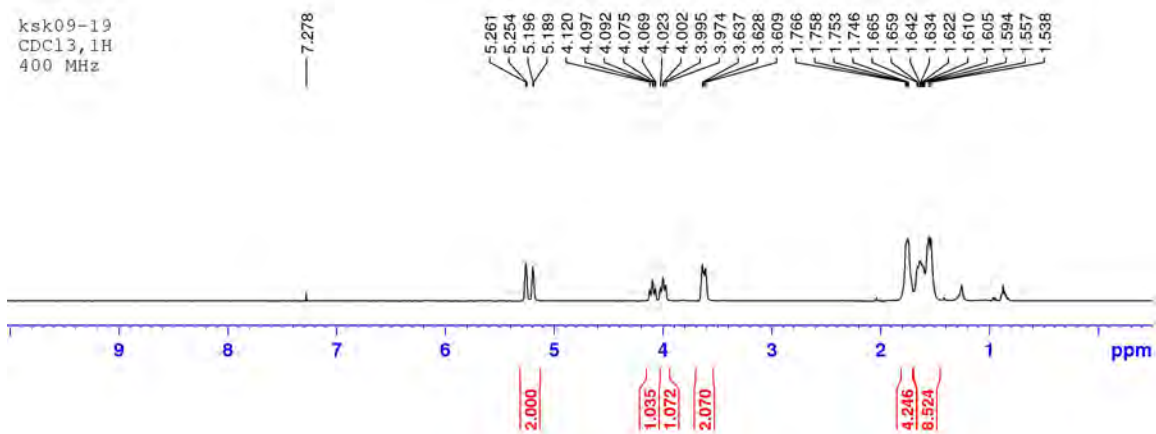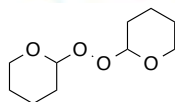

ksk09-19  
CDCl<sub>3</sub>, 13C  
100 MHz

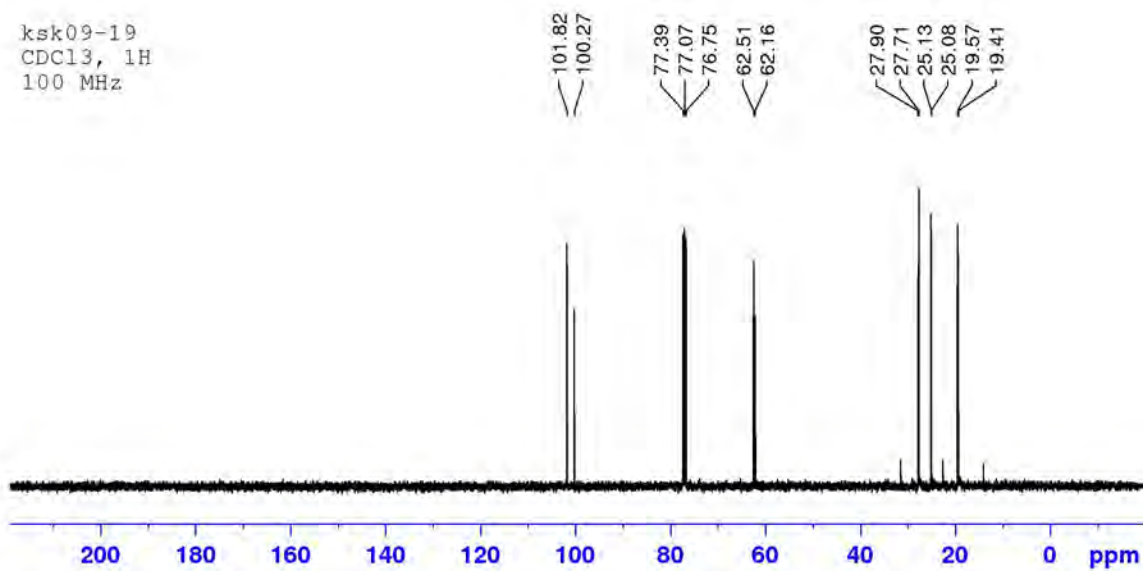

15b

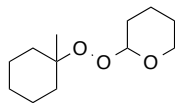

kak09-13  
CDCl<sub>3</sub>, 1H  
300 MHz

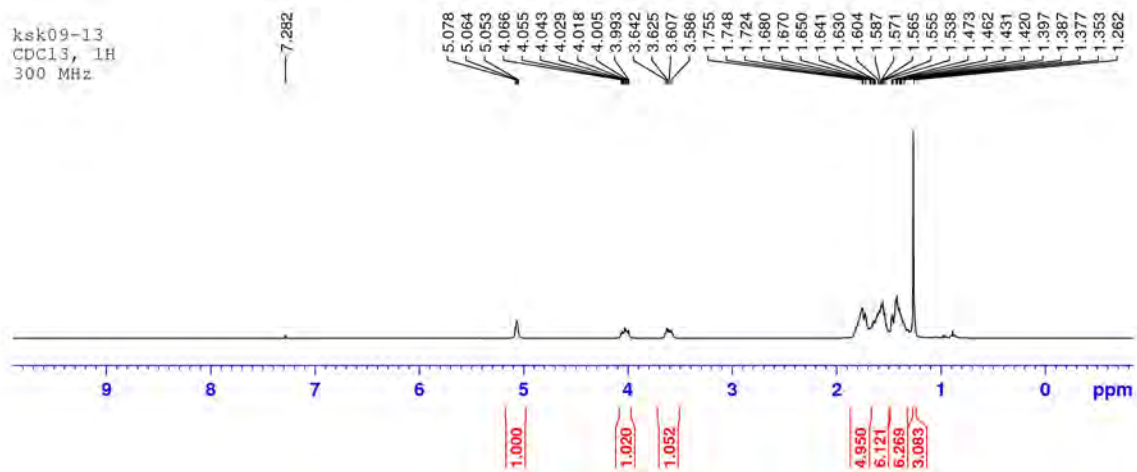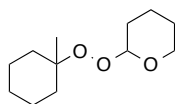

kak09-13  
CDCl<sub>3</sub>, 13C  
75 MHz

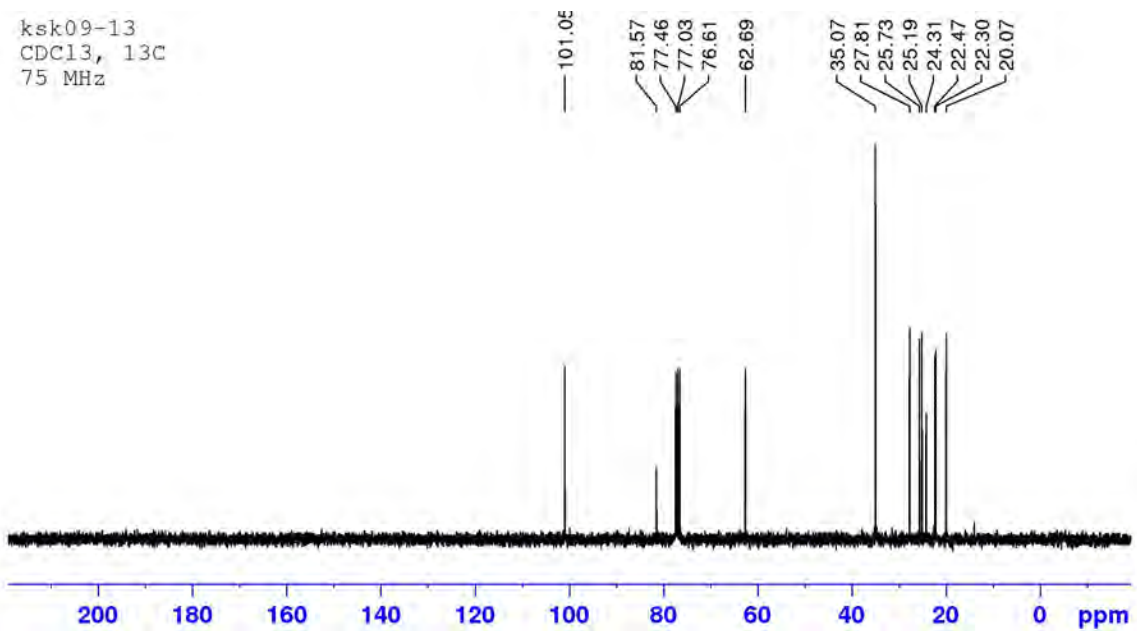

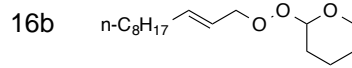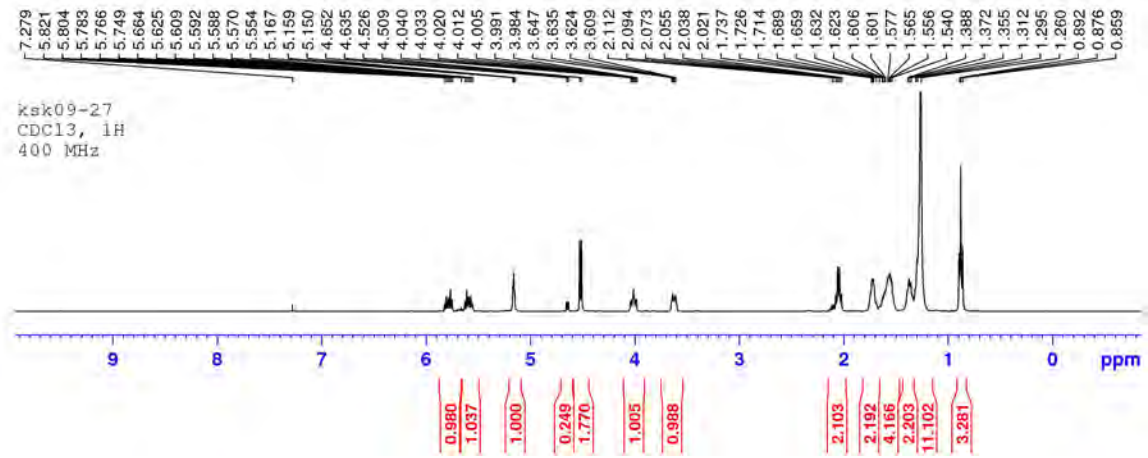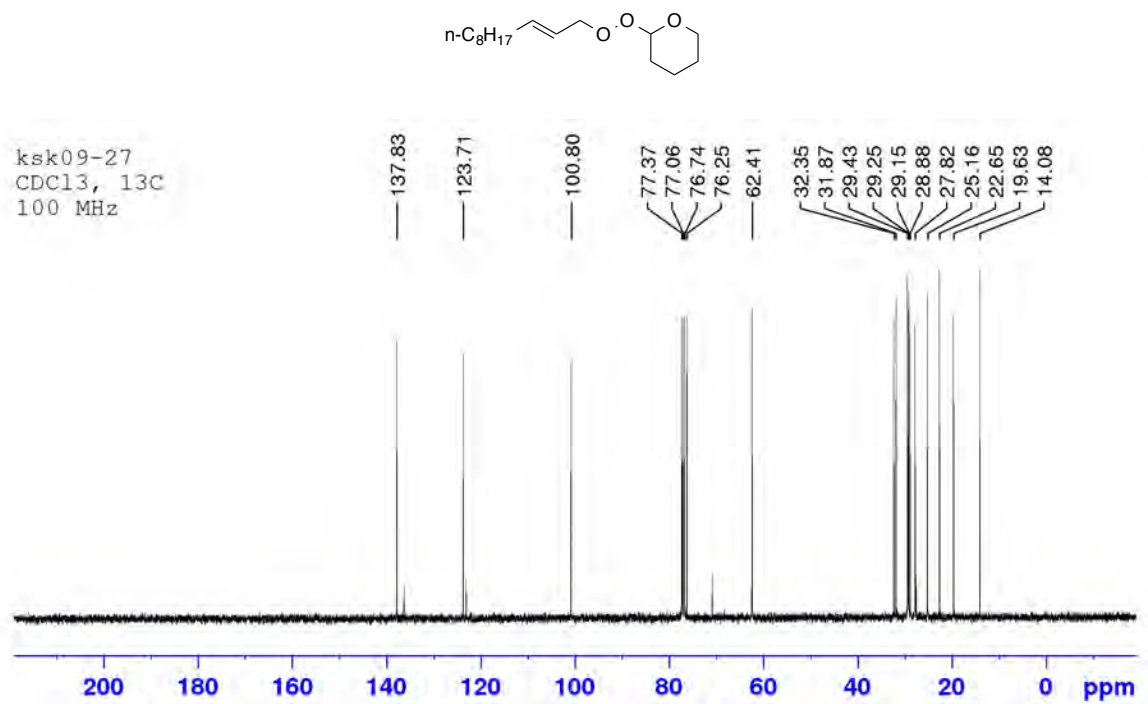

17a

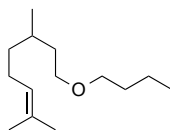

ksk08-80  
CDCl<sub>3</sub>, 1H  
400 MHz

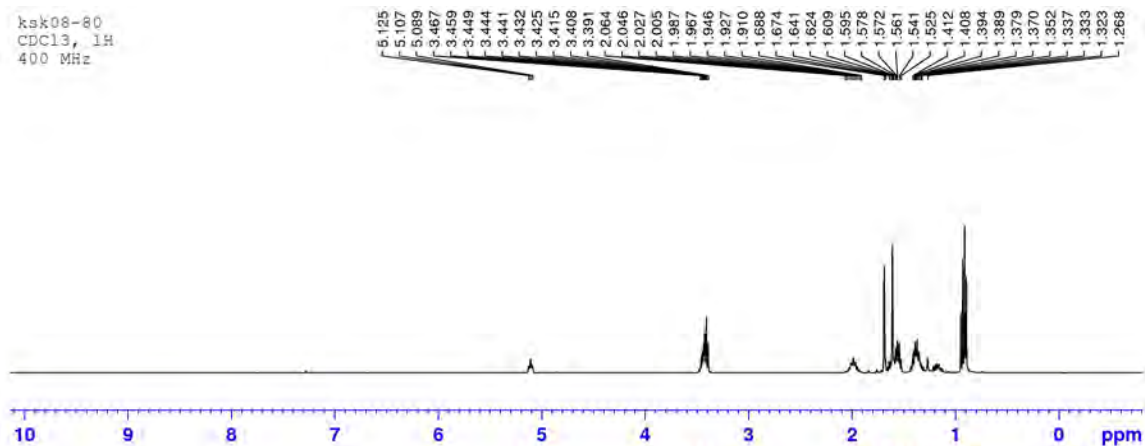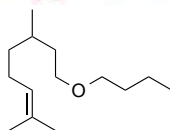

ksk08-80  
CDCl<sub>3</sub>, 13C  
100 MHz

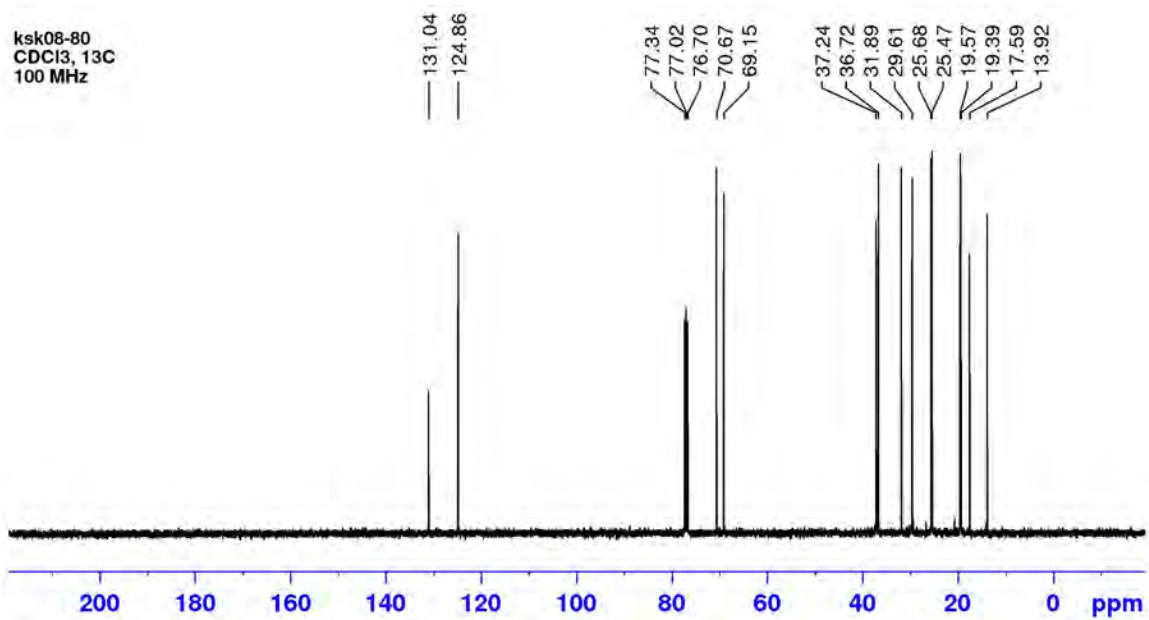

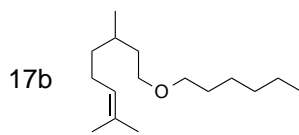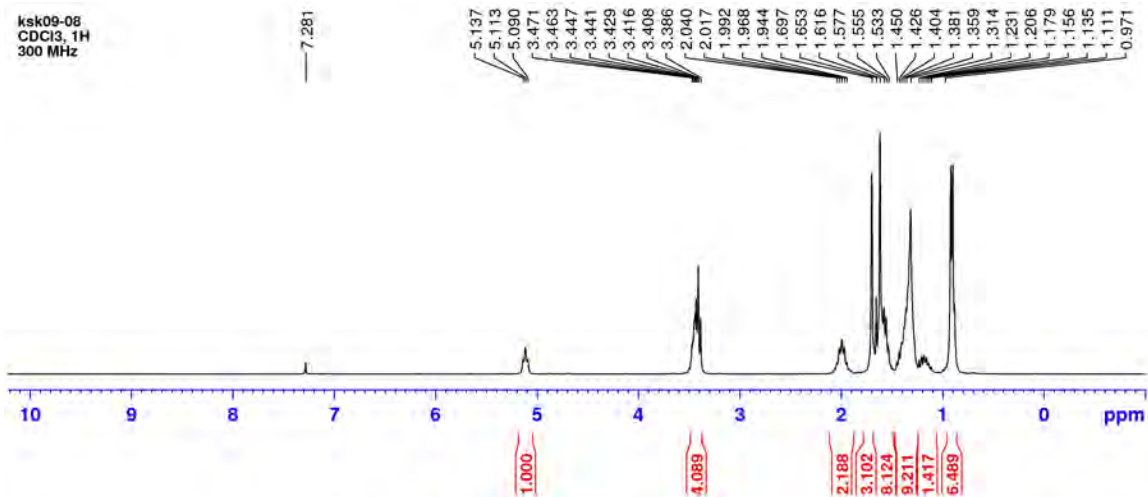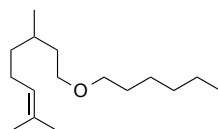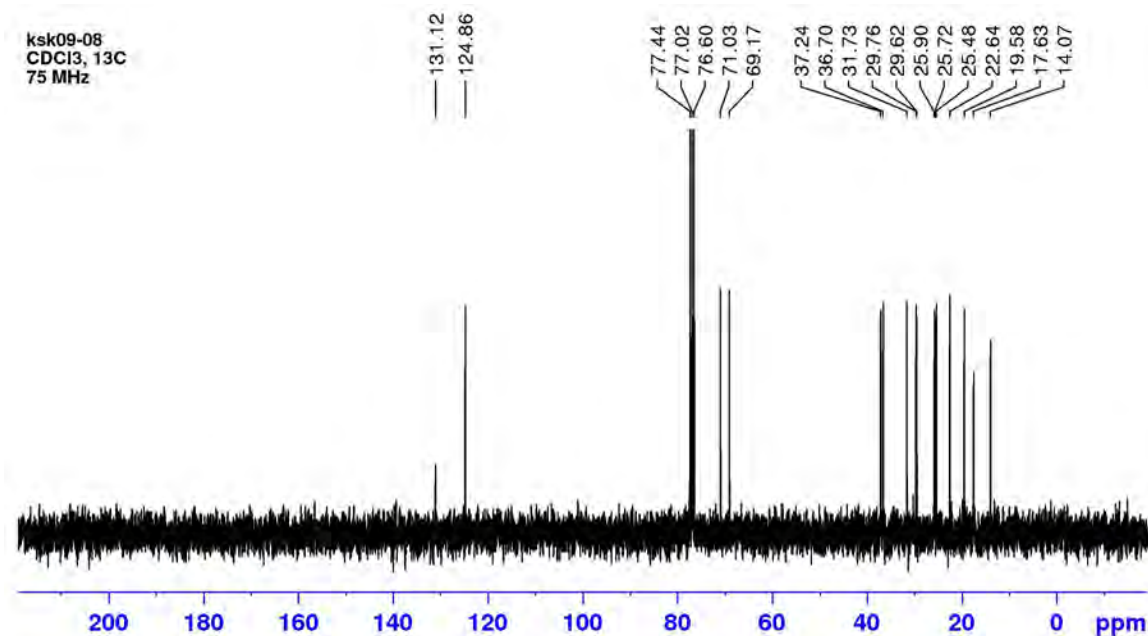



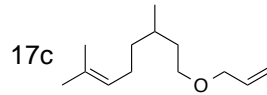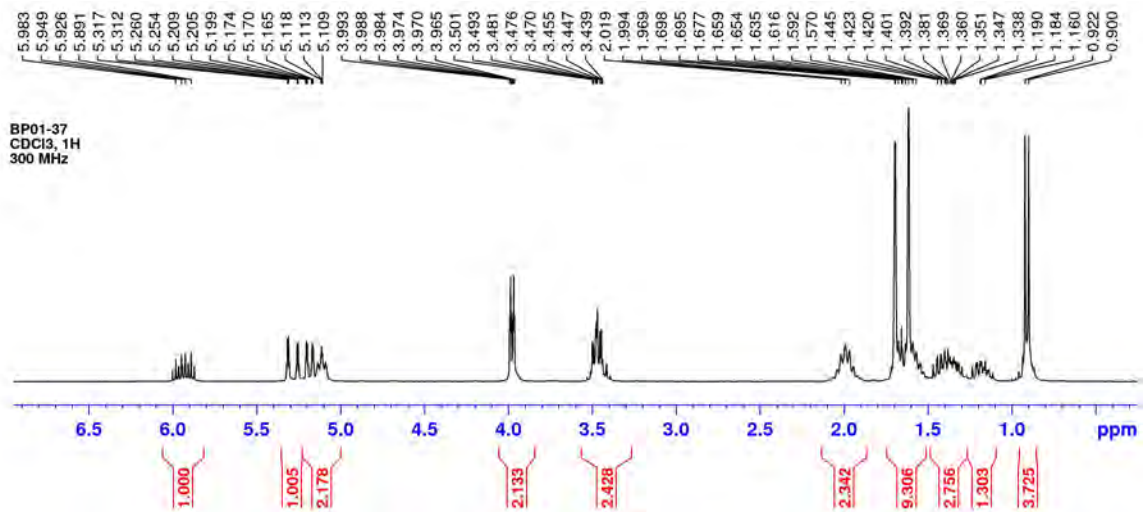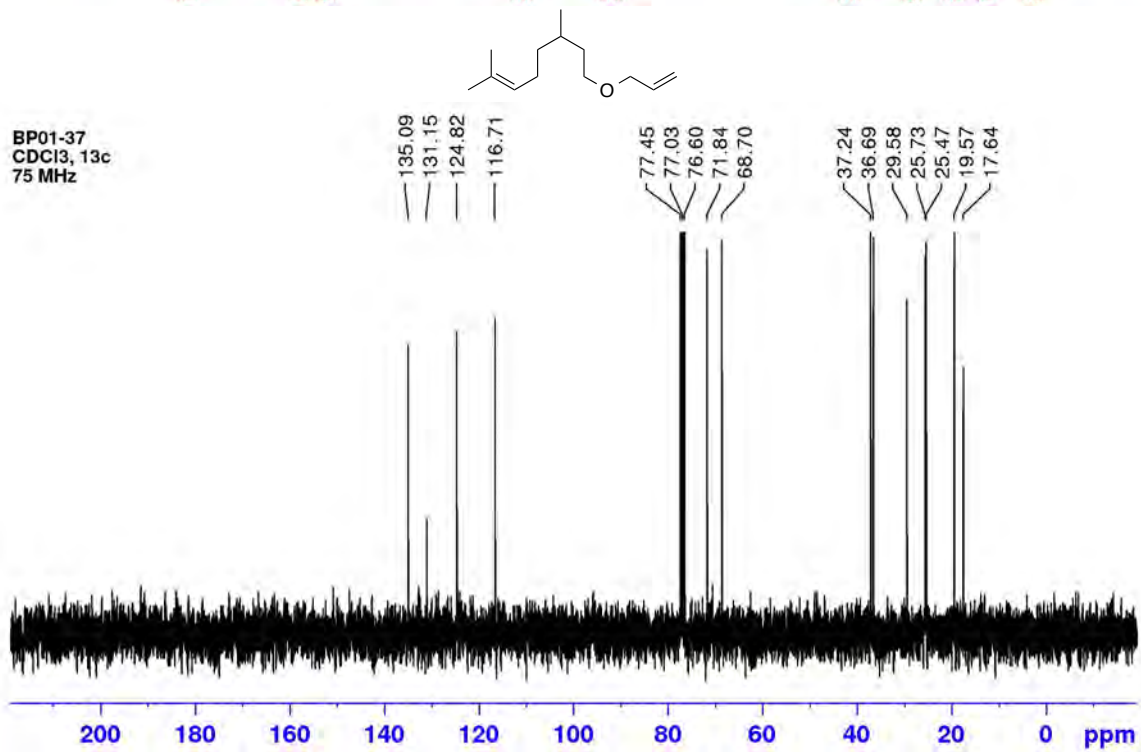



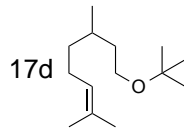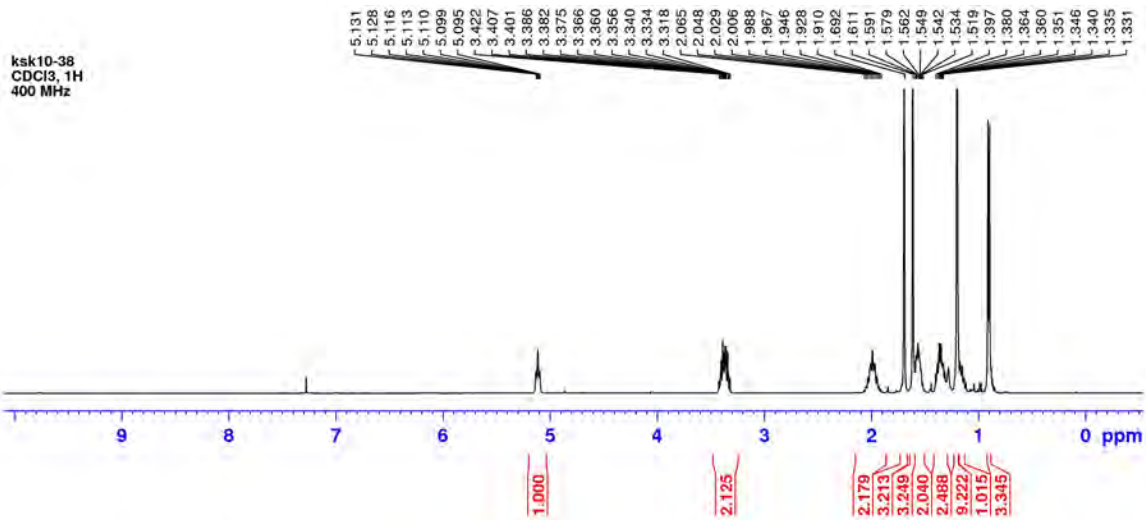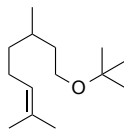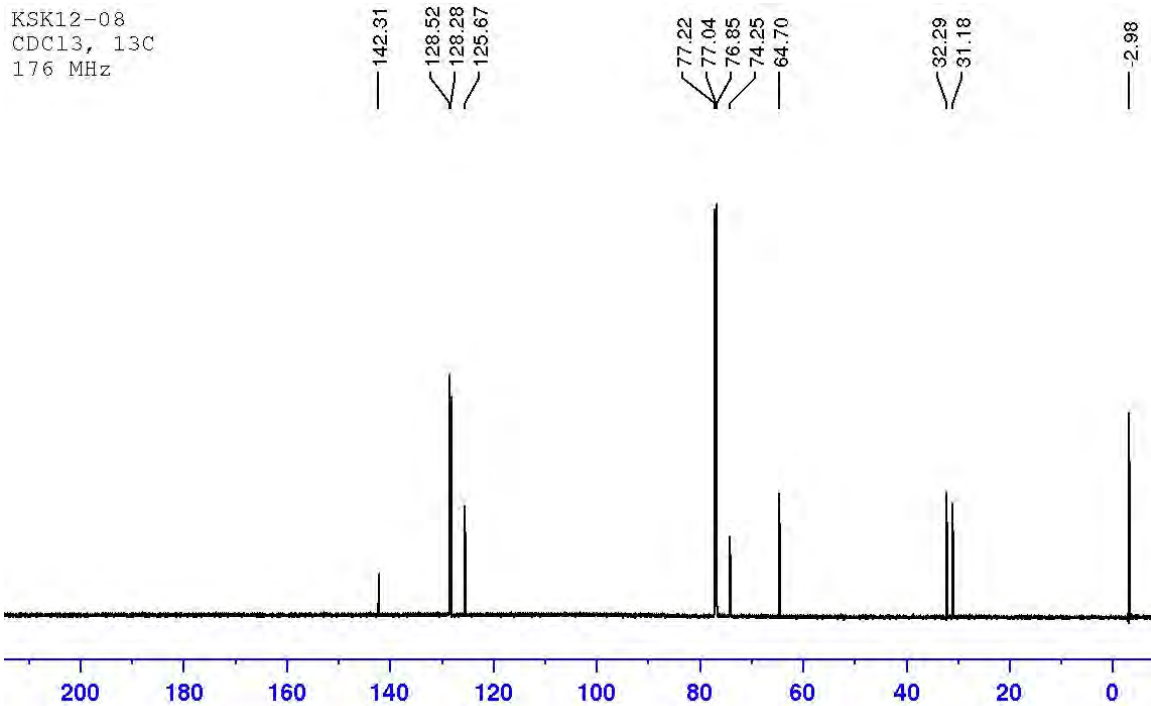

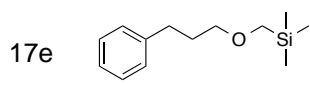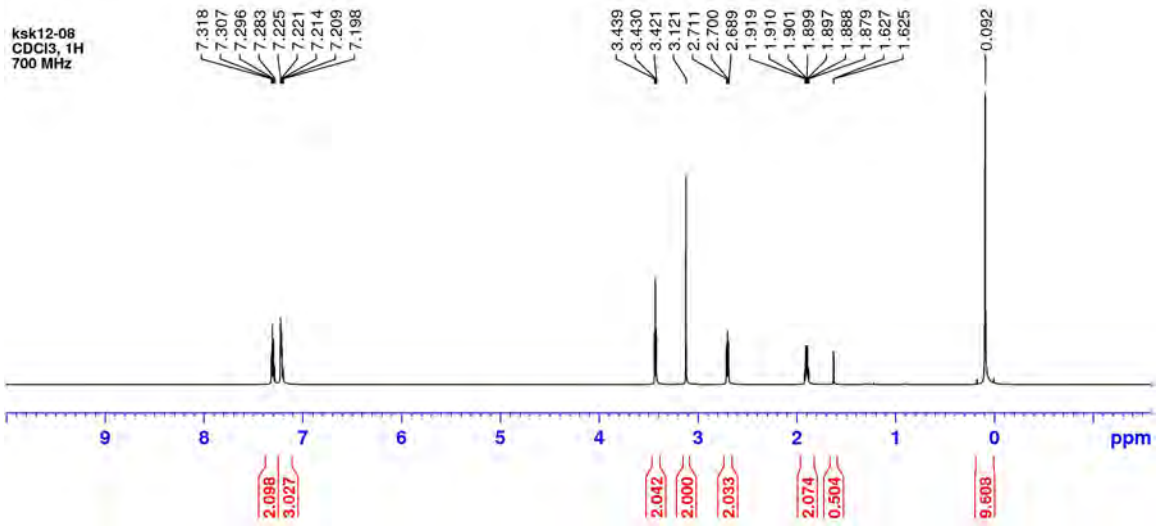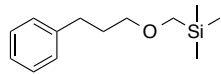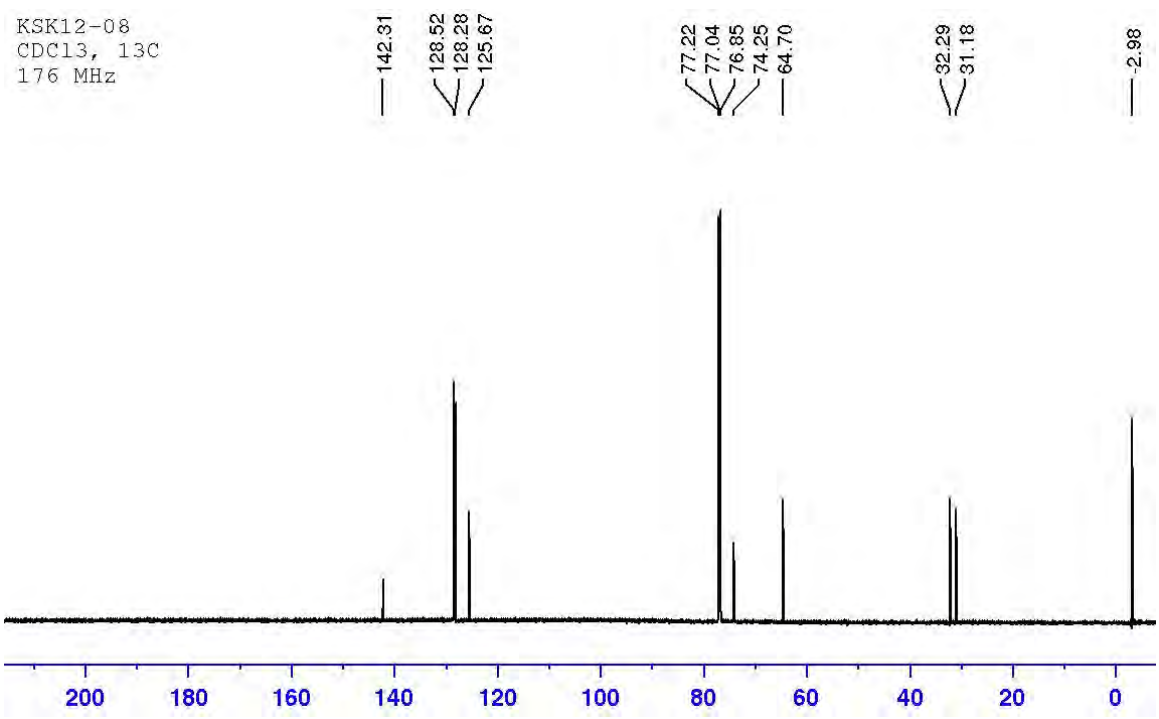

17f

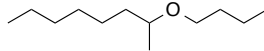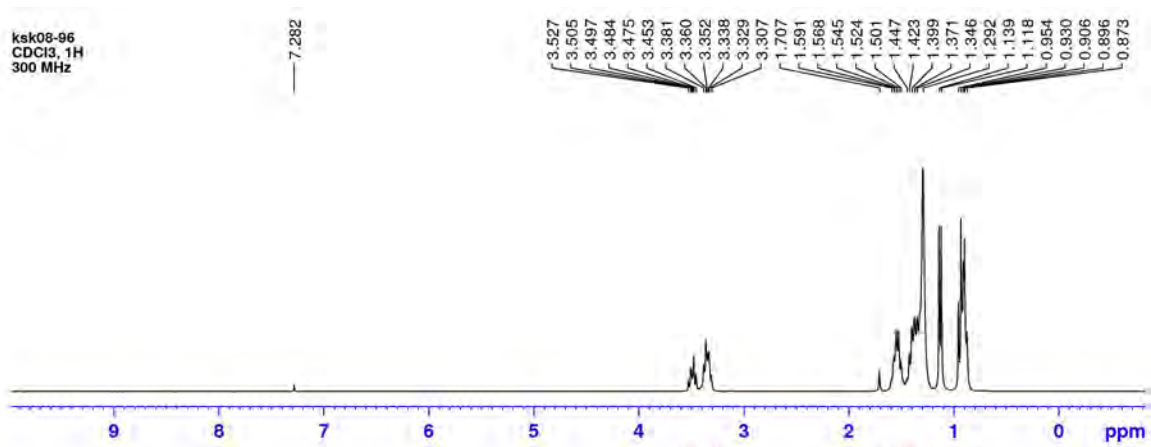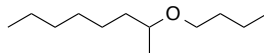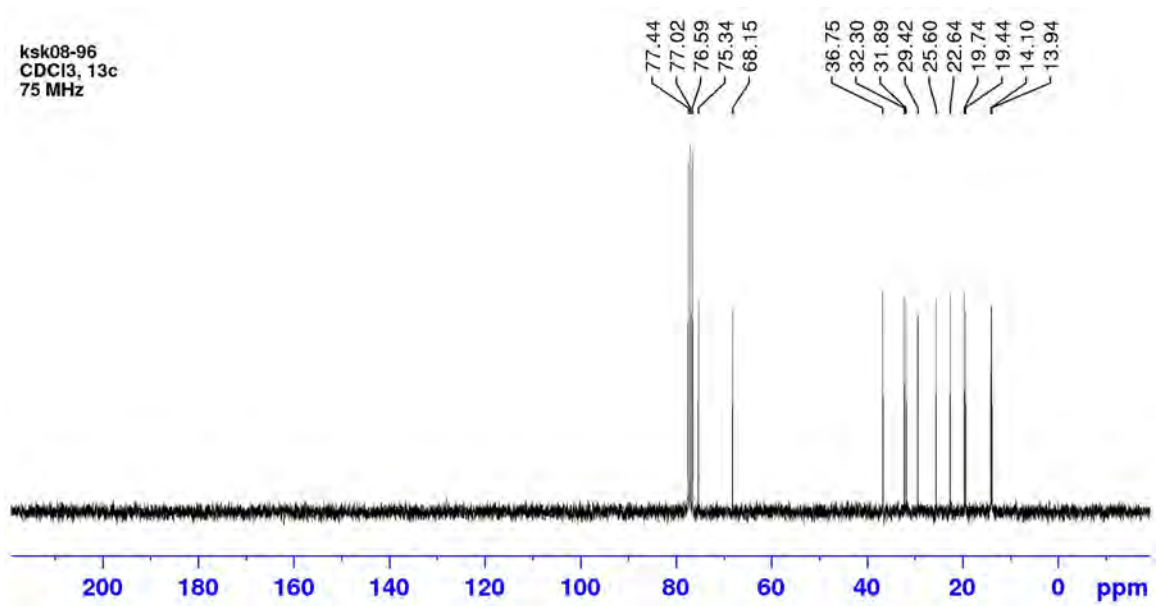

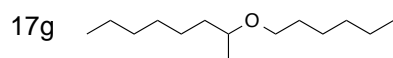

ksk09-17  
CDCl<sub>3</sub>, 1H  
300 MHz

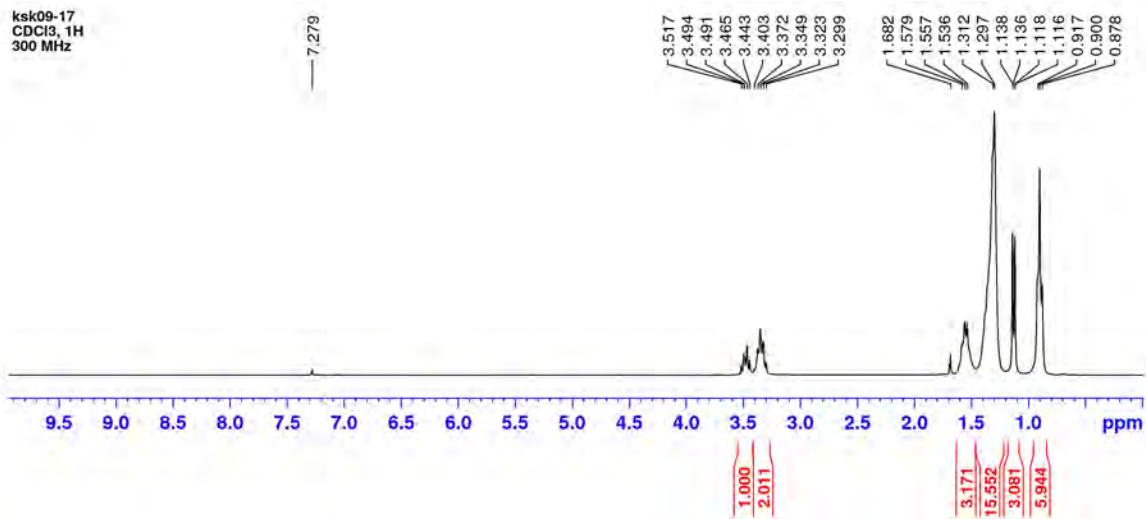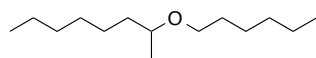

ksk09-17  
CDCl<sub>3</sub>, 13C  
75 MHz

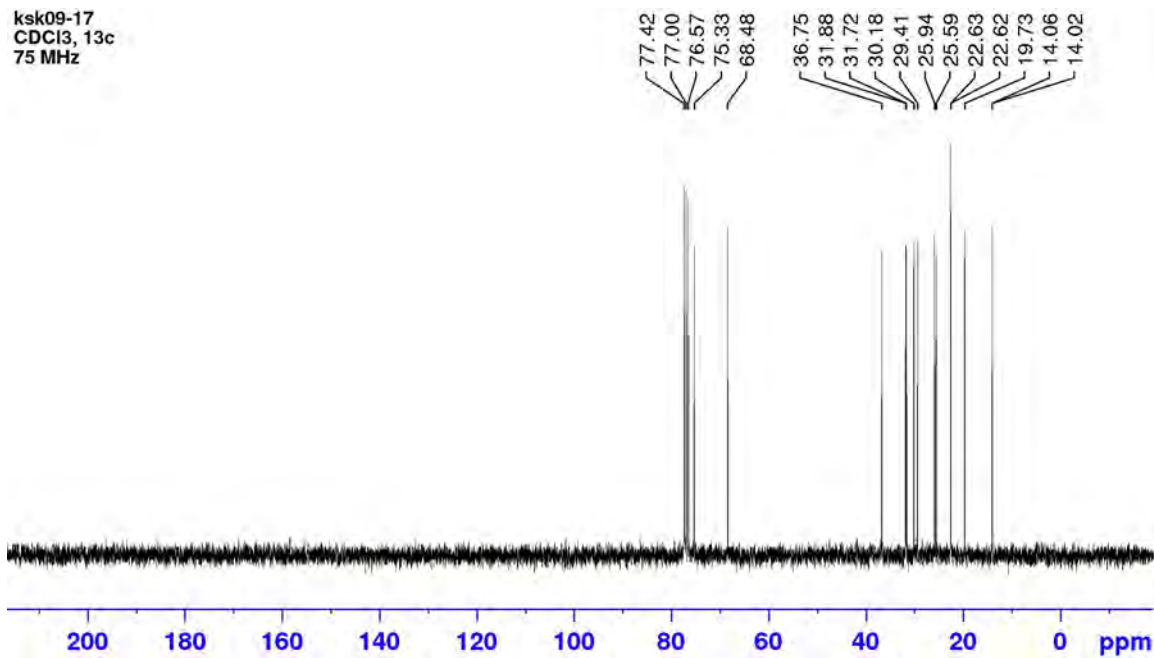

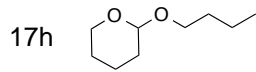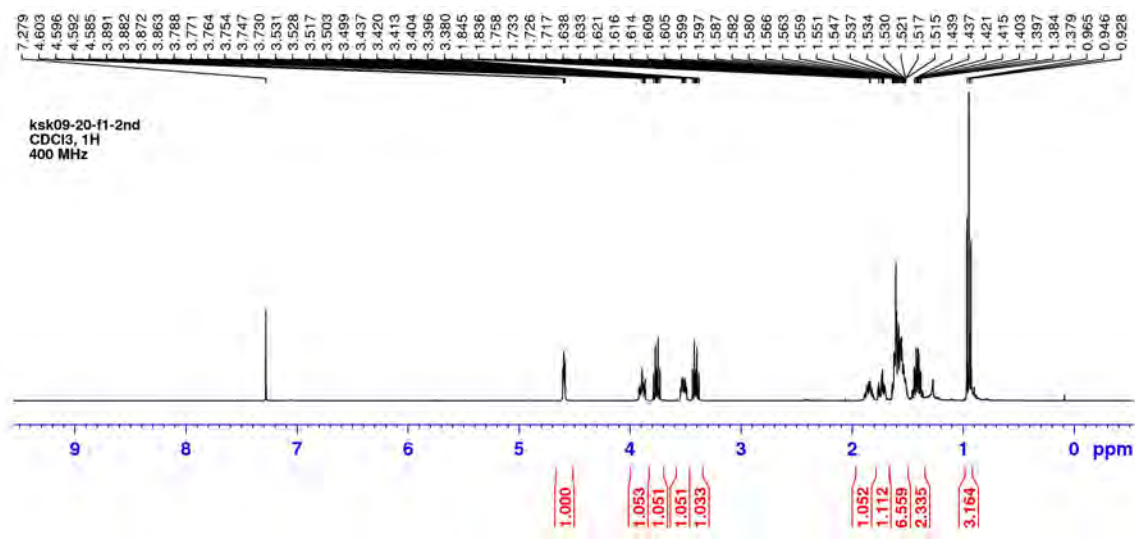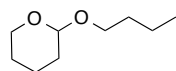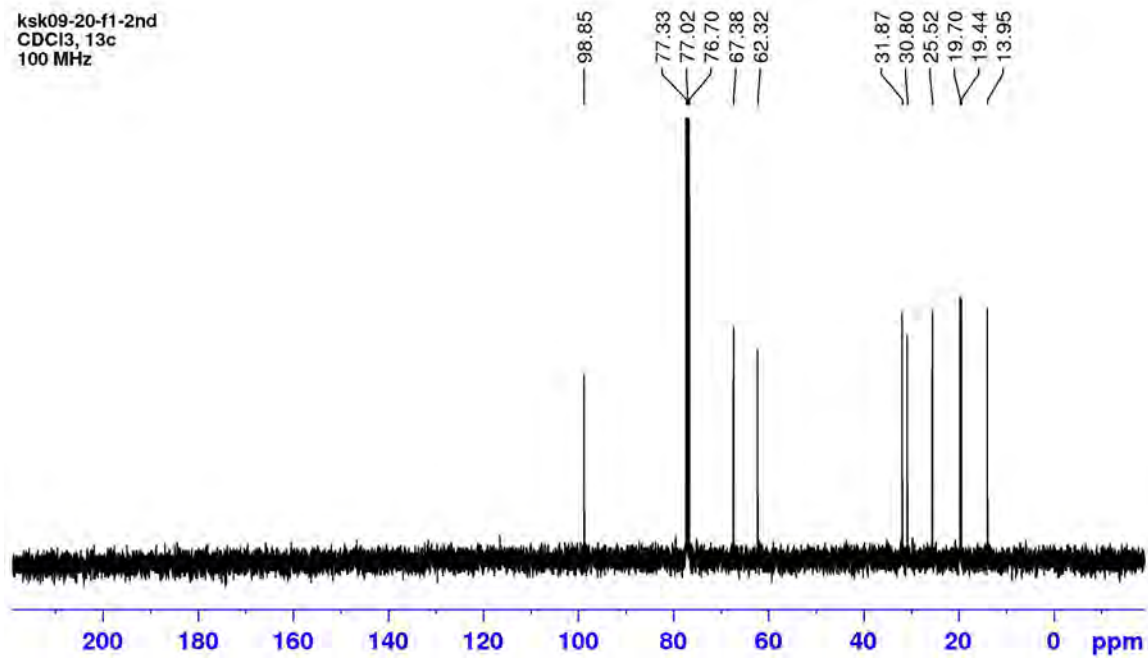

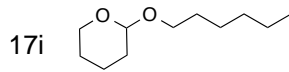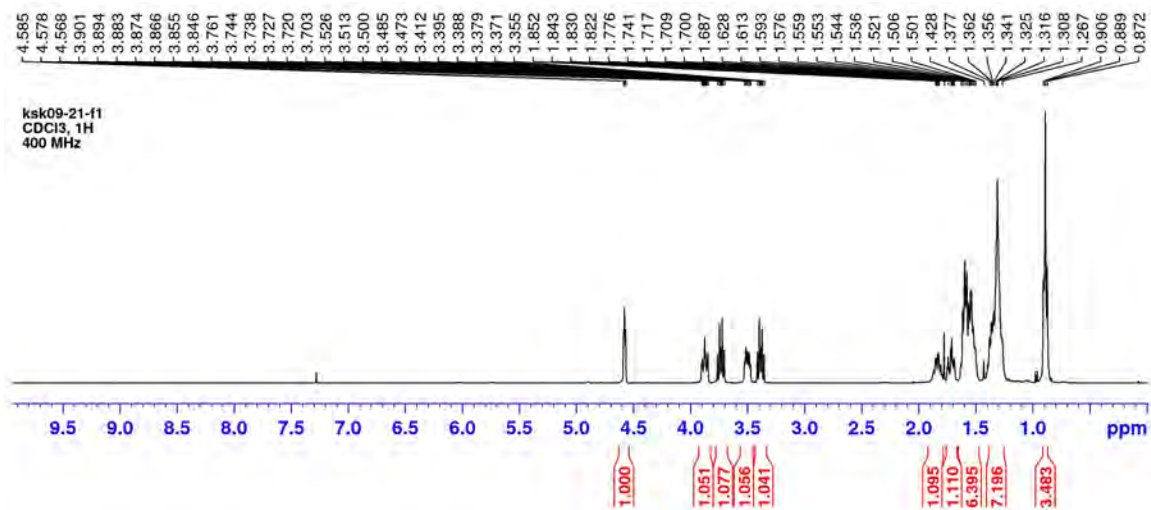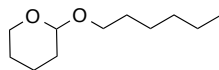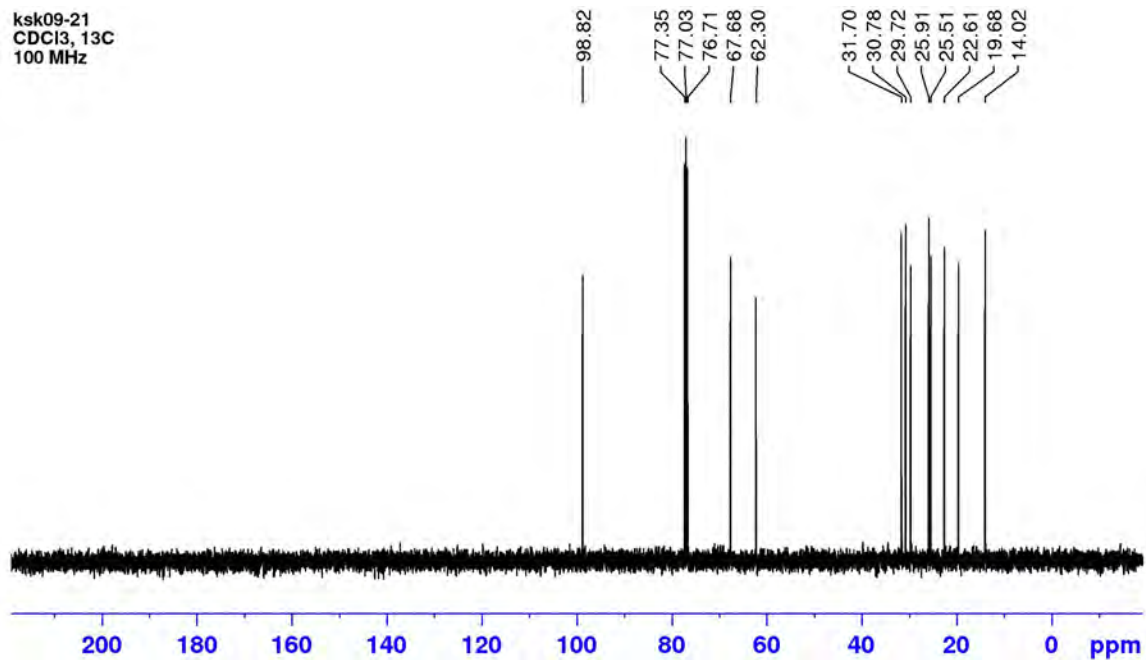

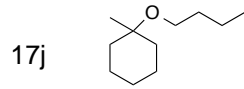

ksk09-15  
CDCl<sub>3</sub>, 1H  
300 MHz

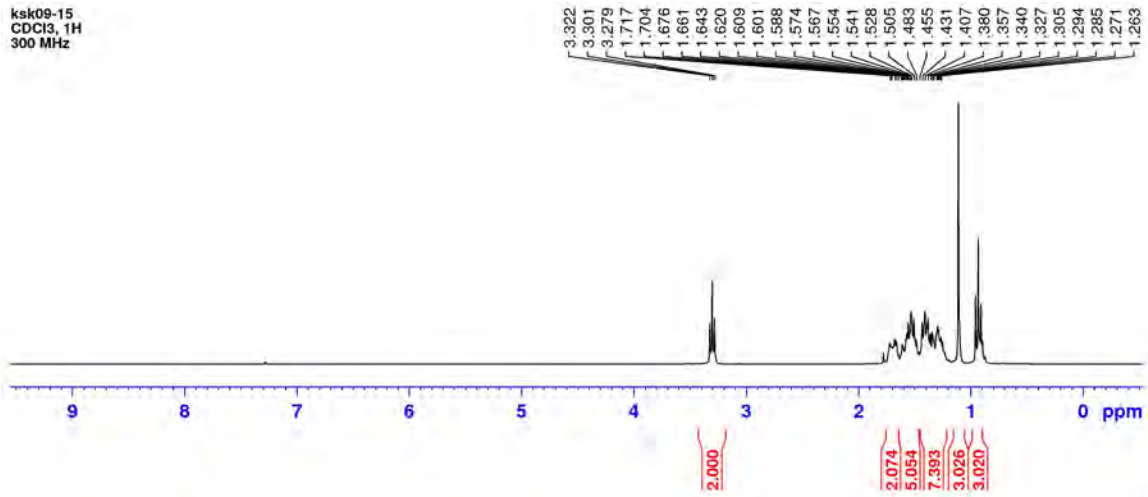

ksk09-15  
CDCl<sub>3</sub>, 13C  
75 MHz

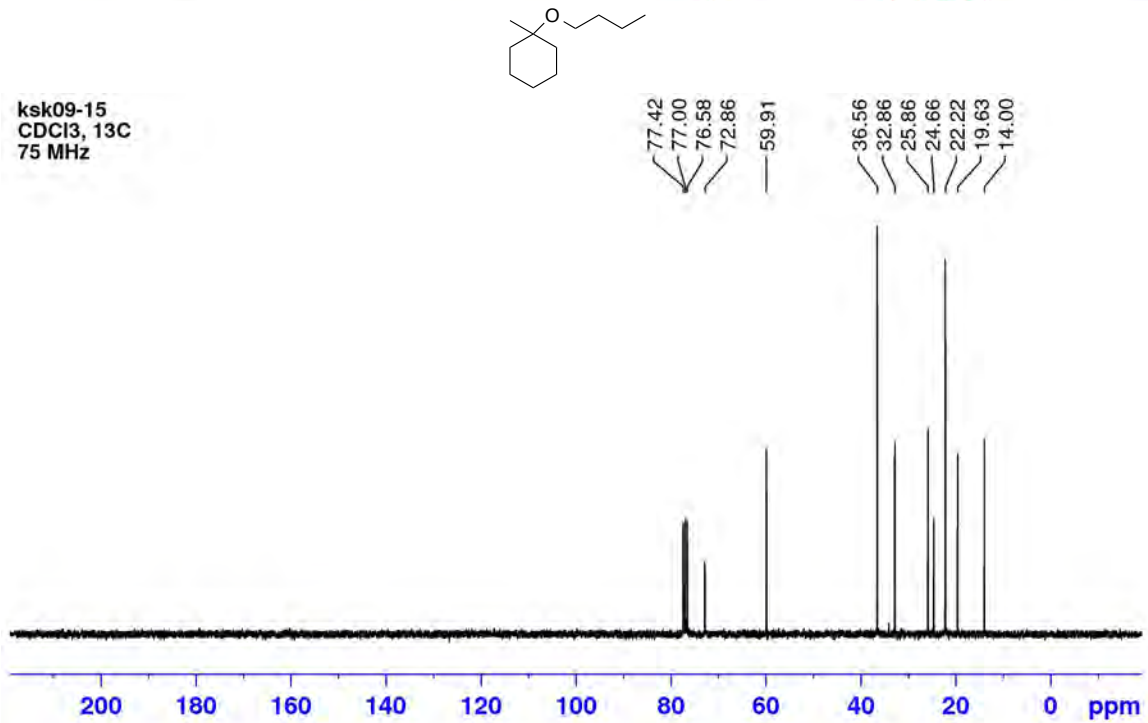



17k

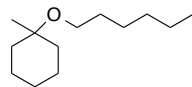

ksk09-18-2nd  
CDCl<sub>3</sub>, 1H  
400 MHz

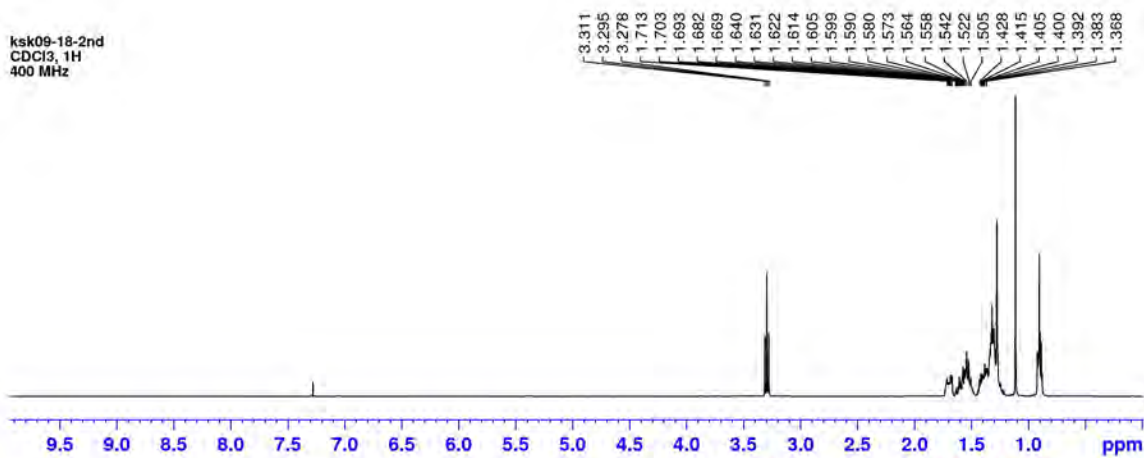

ksk09-18  
CDCl<sub>3</sub>, 13C  
100 MHz

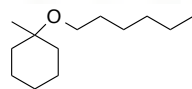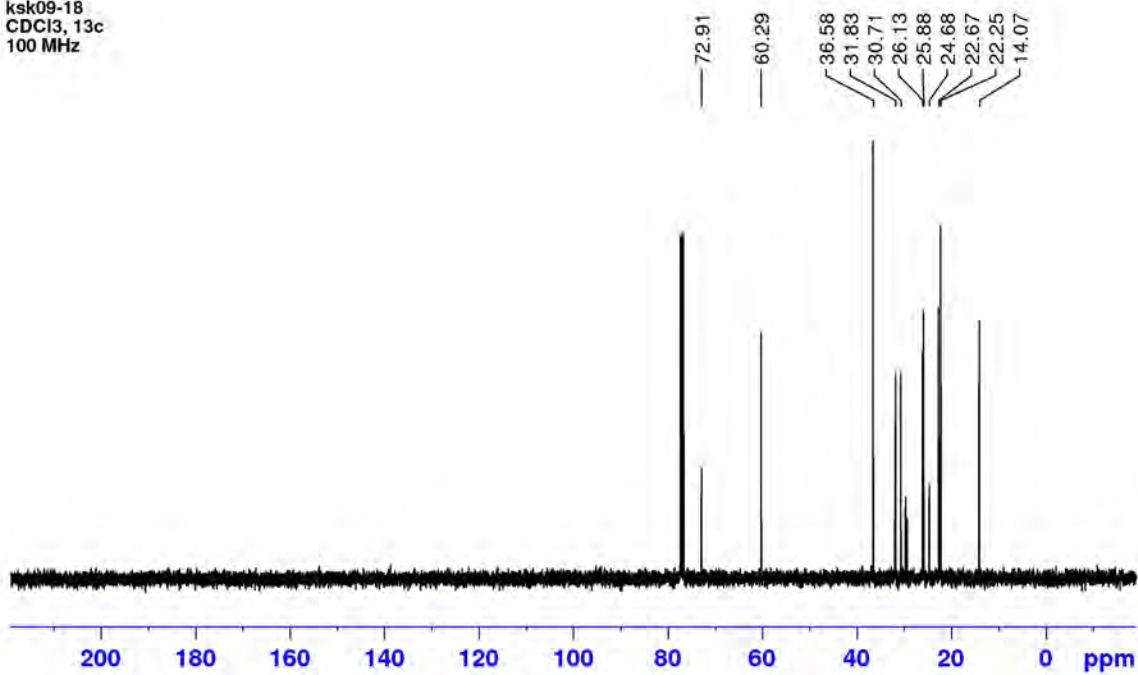



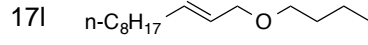

ksk09-28  
CDCl<sub>3</sub>, 1H  
400 MHz

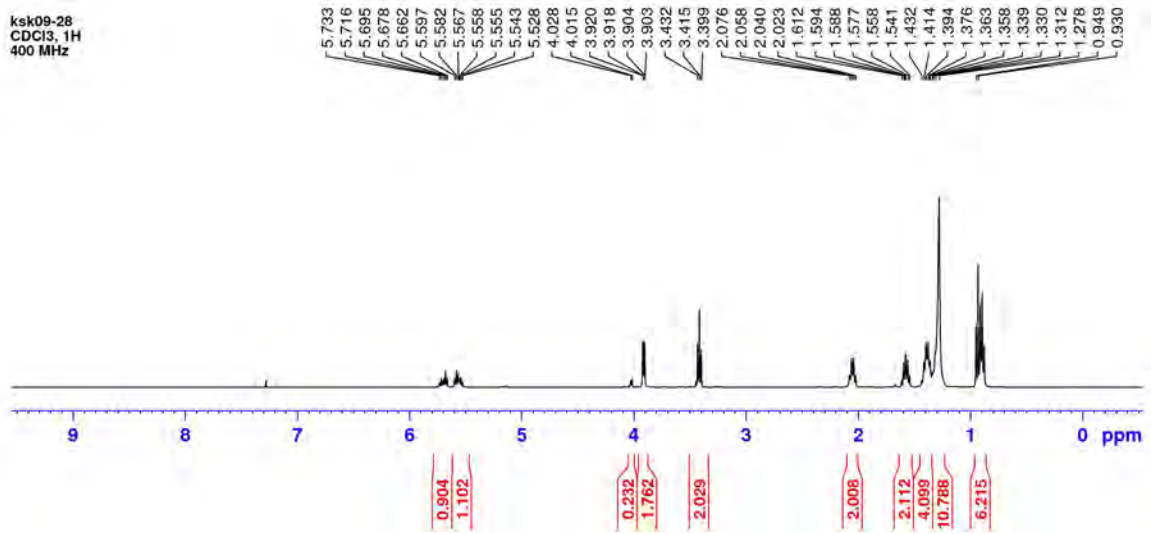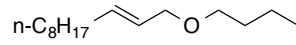

ksk09-28  
CDCl<sub>3</sub>, 13C  
100 MHz

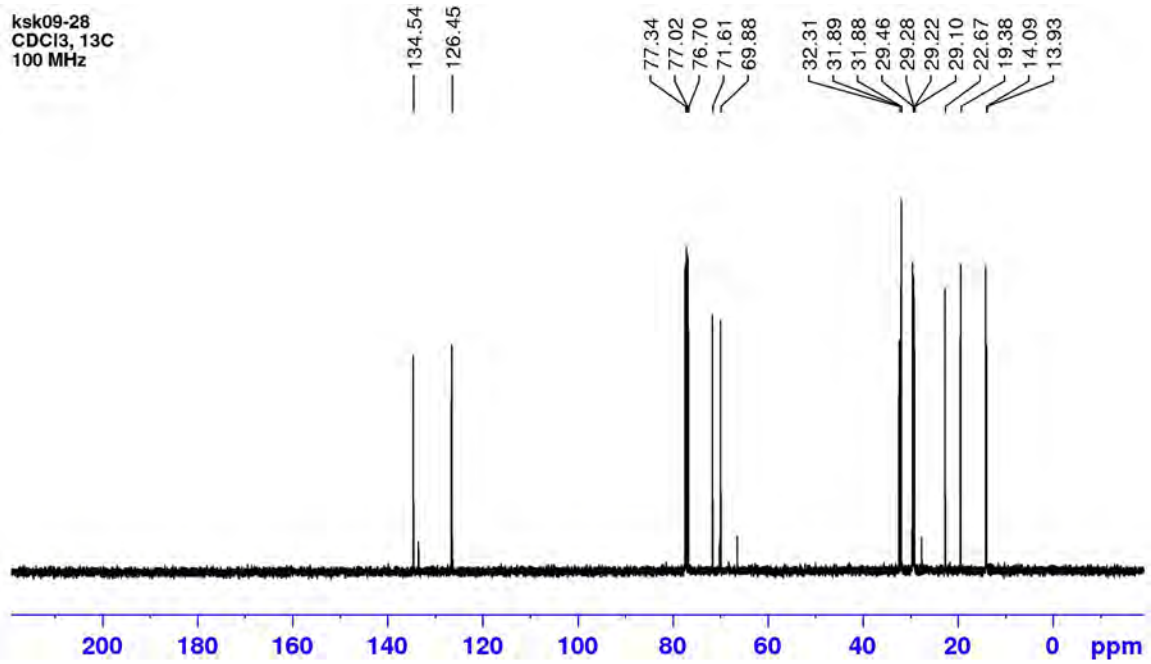

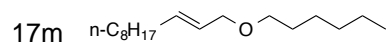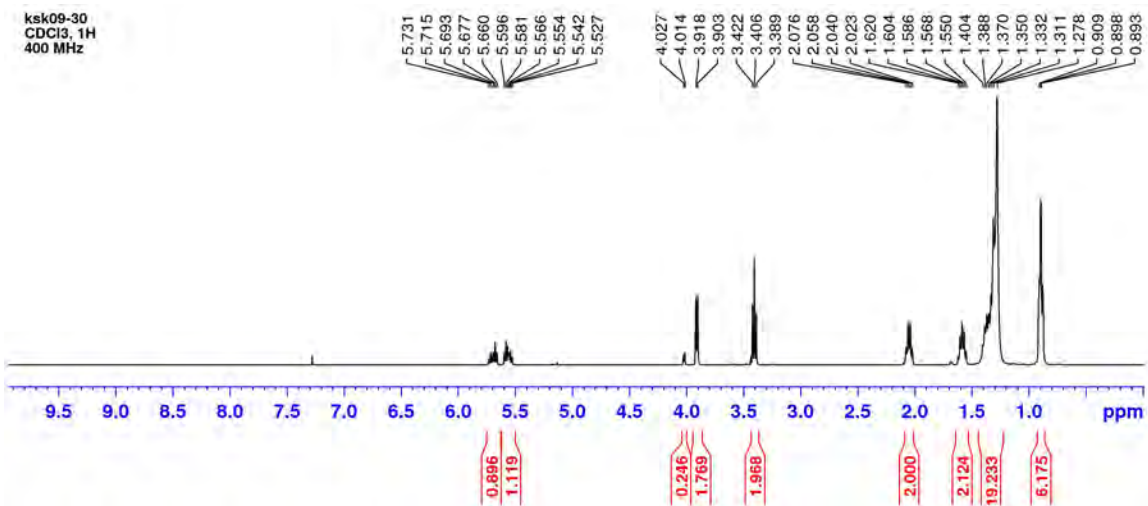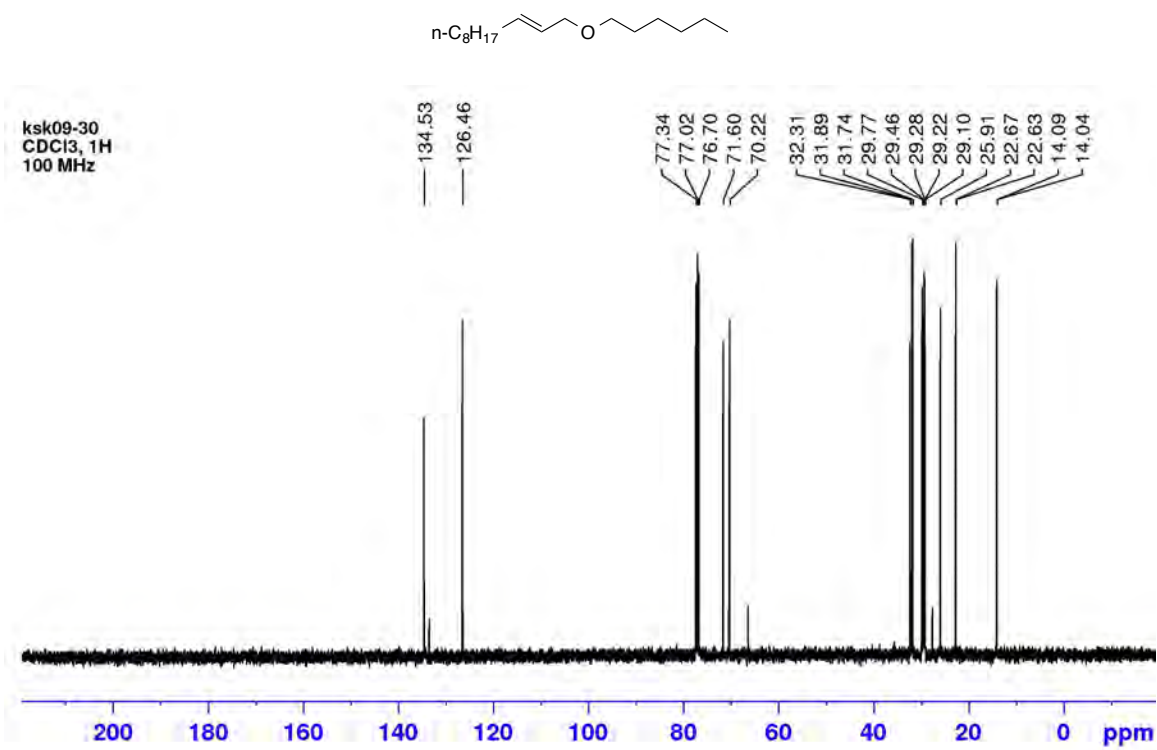

18a

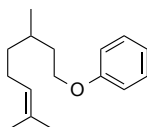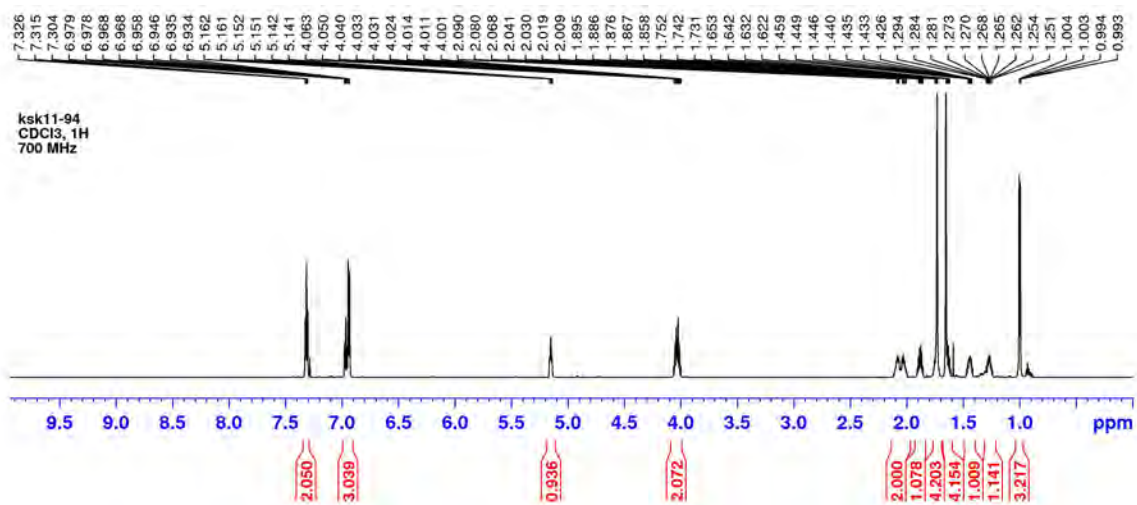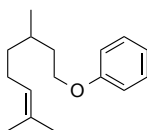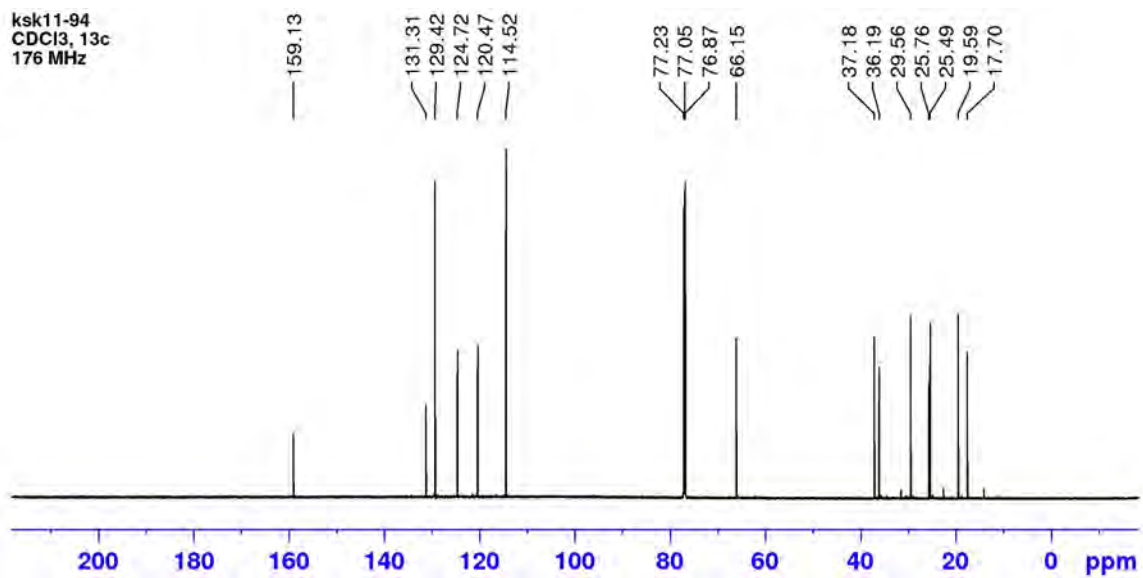

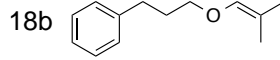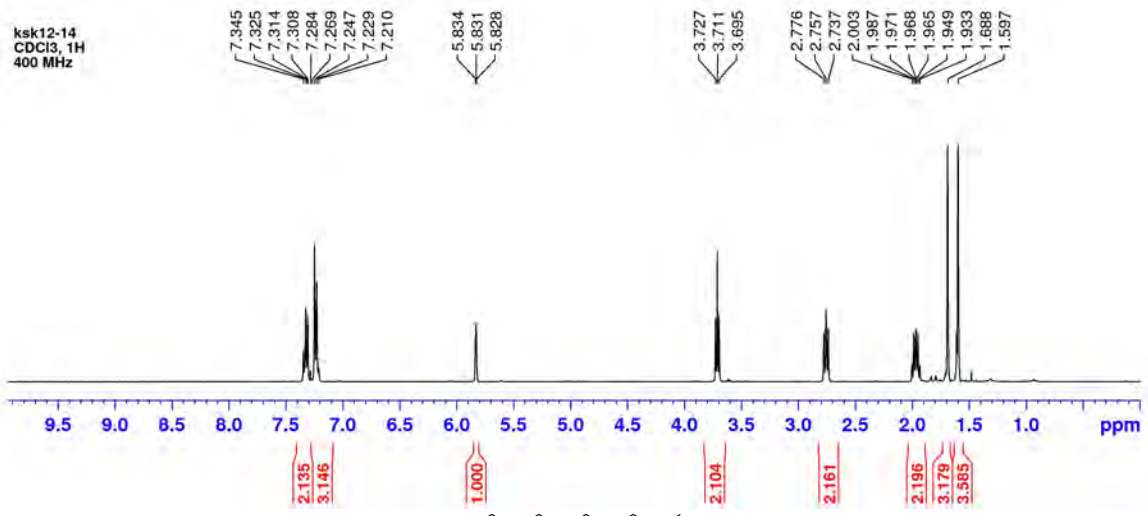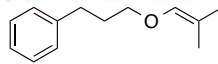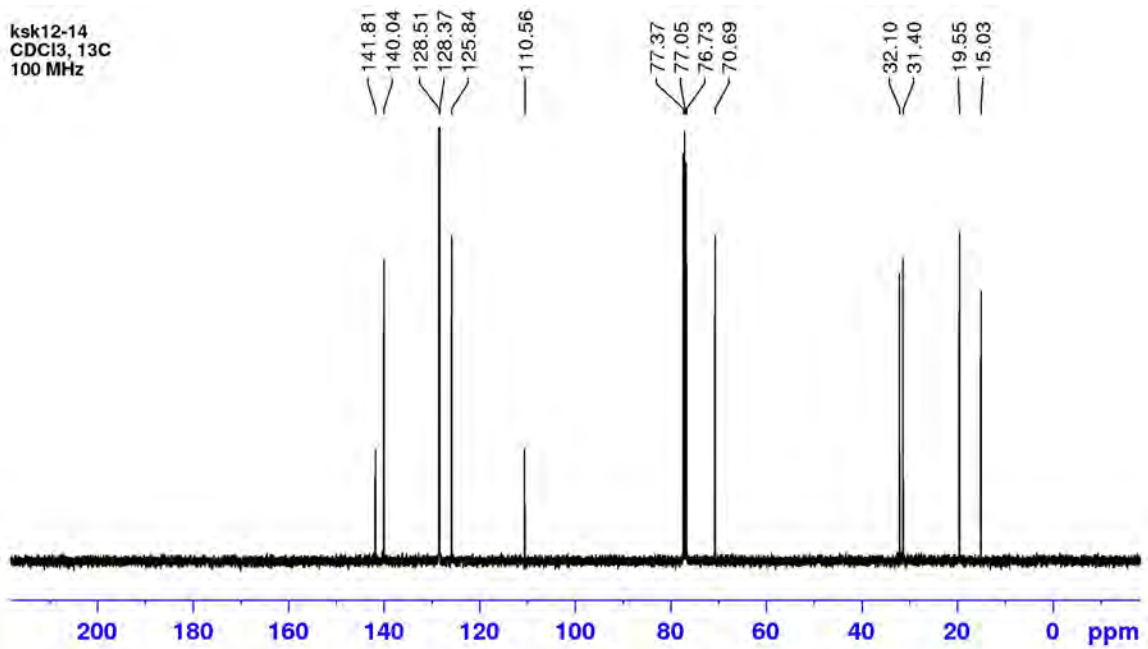

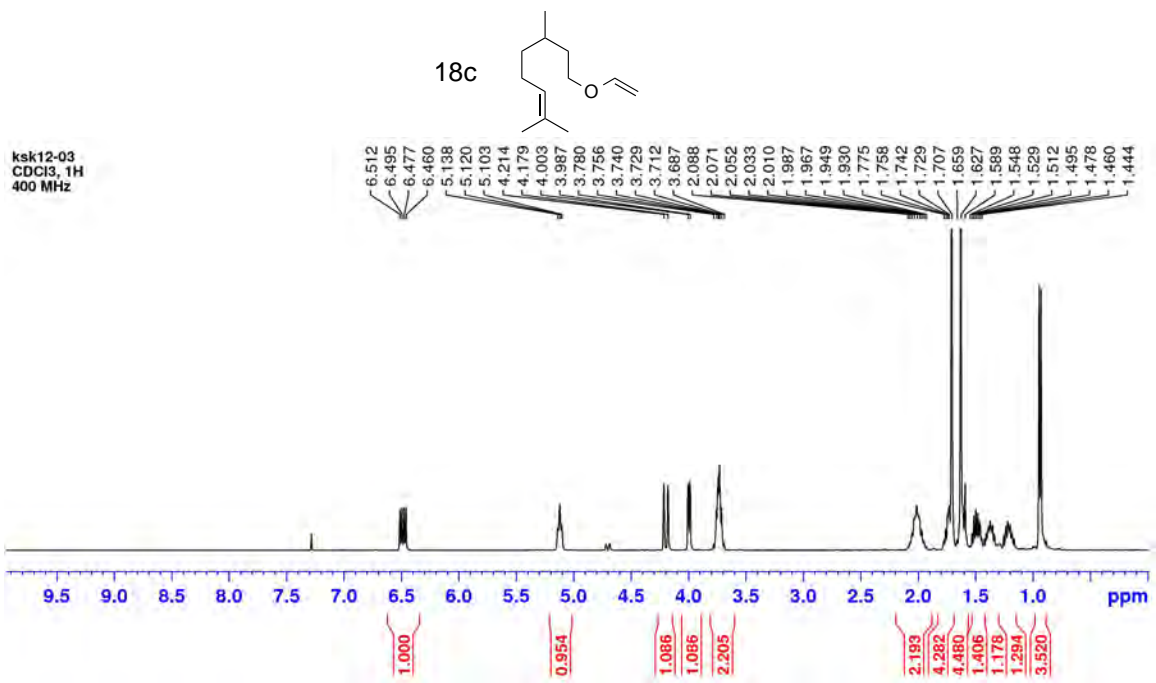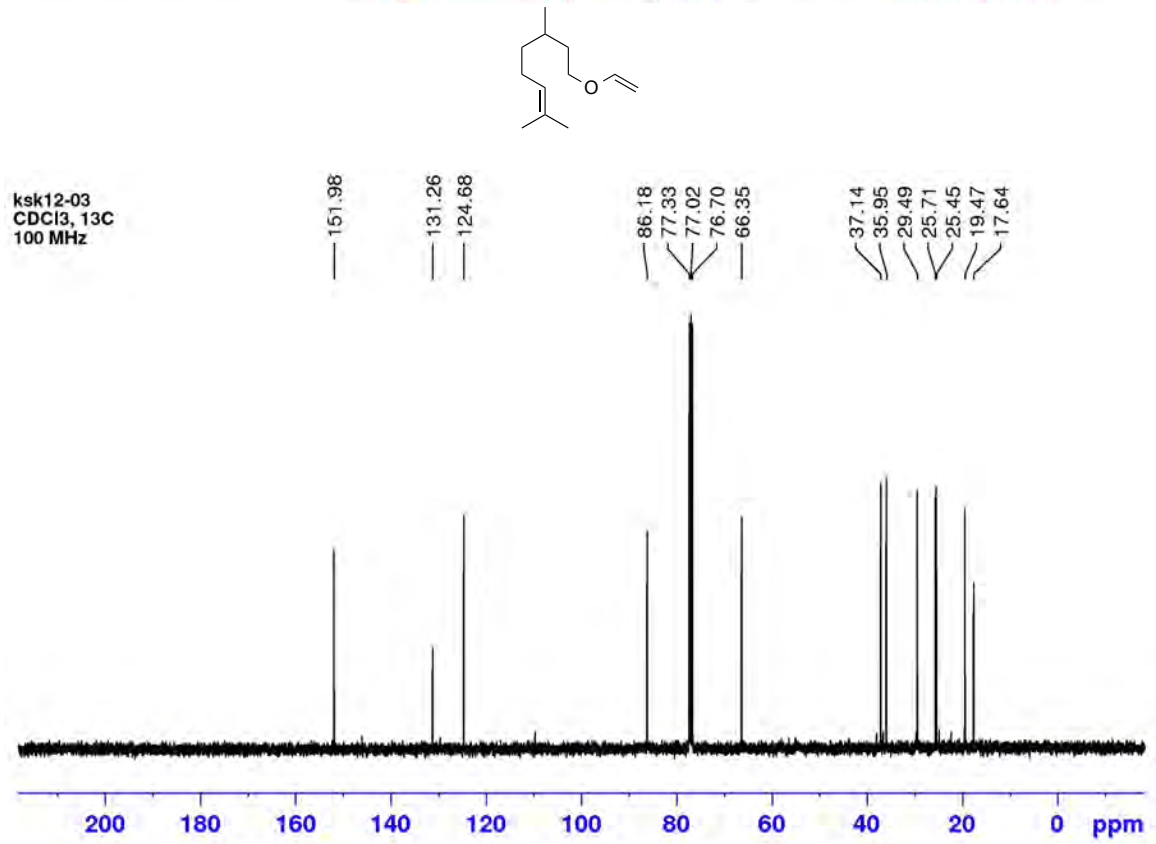

18d

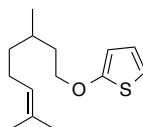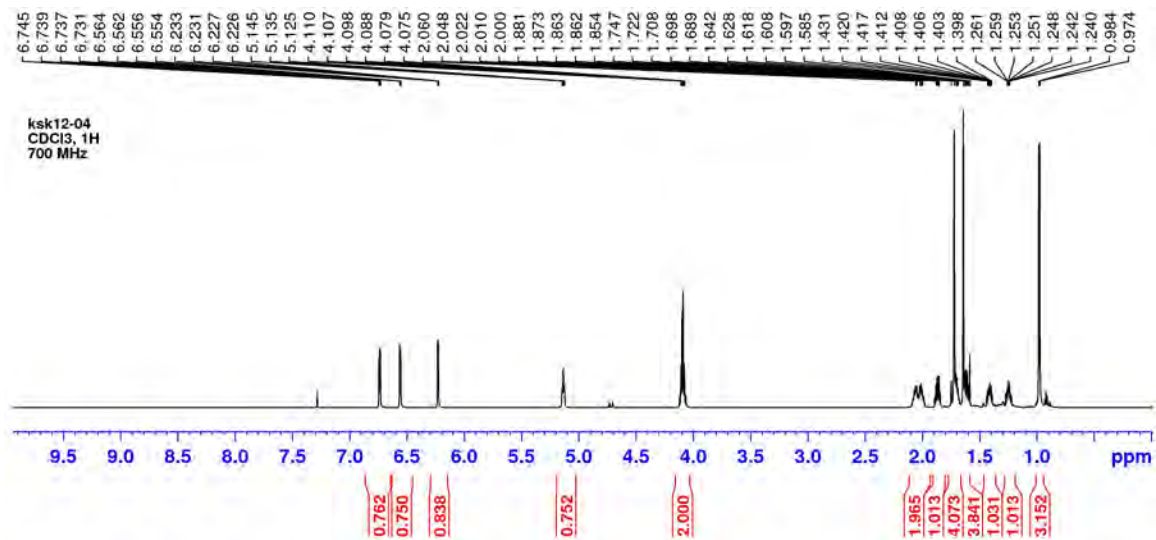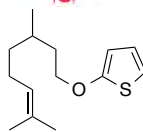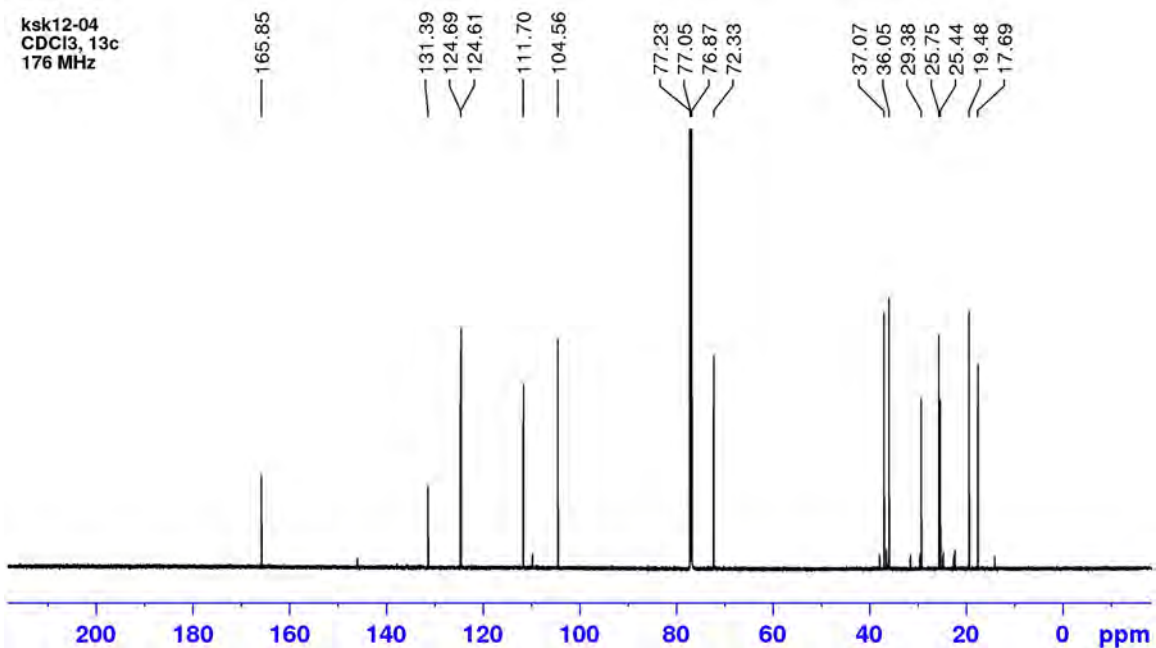

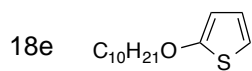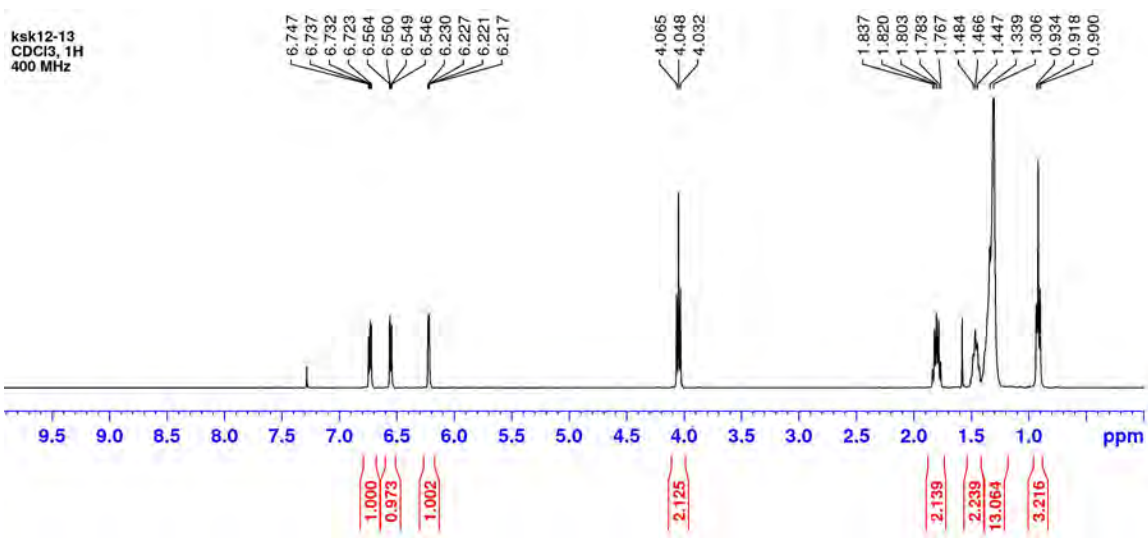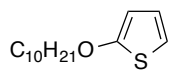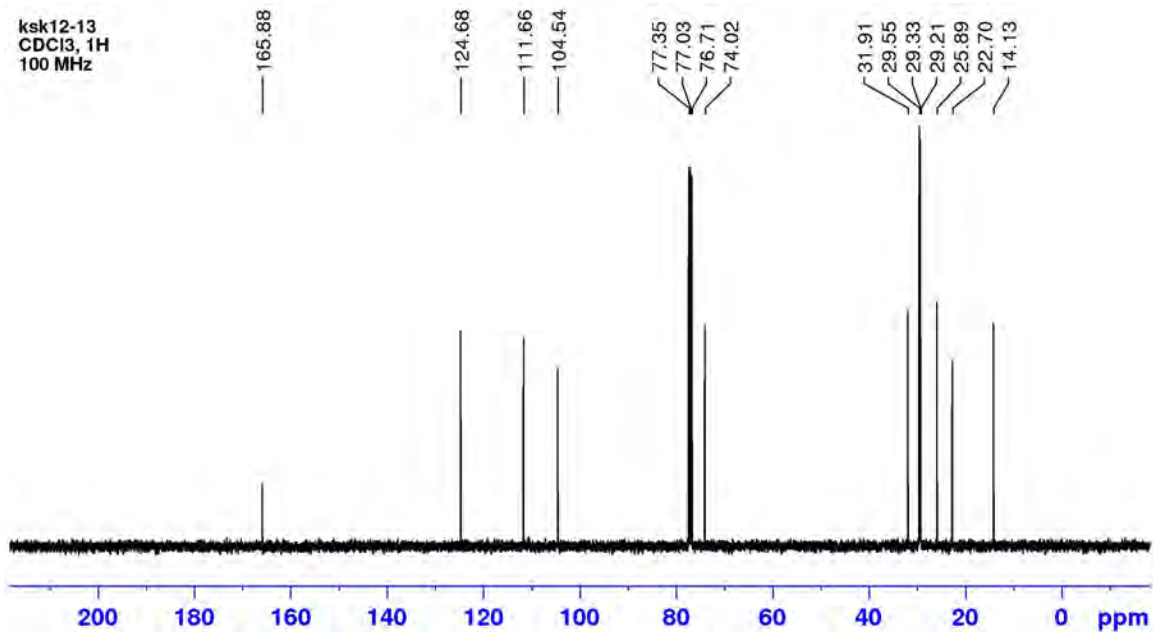



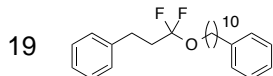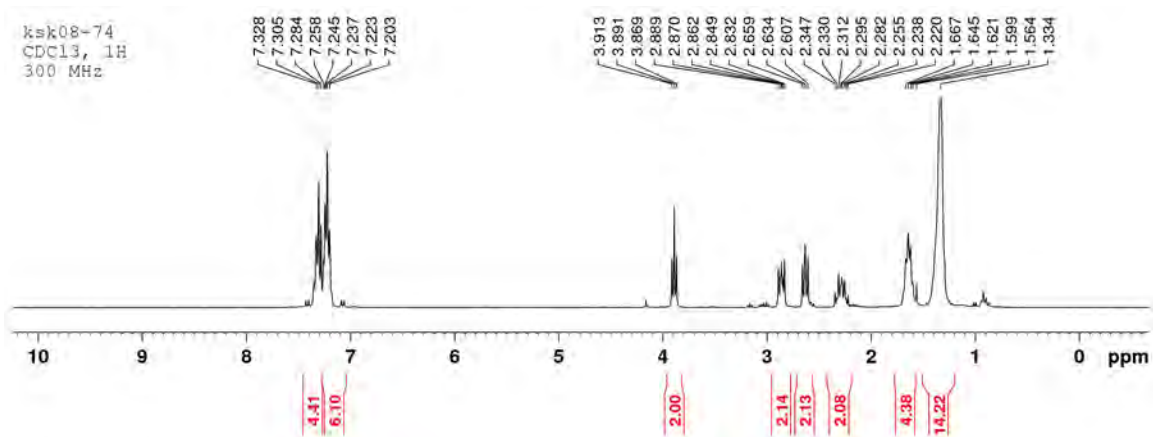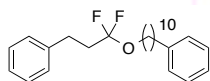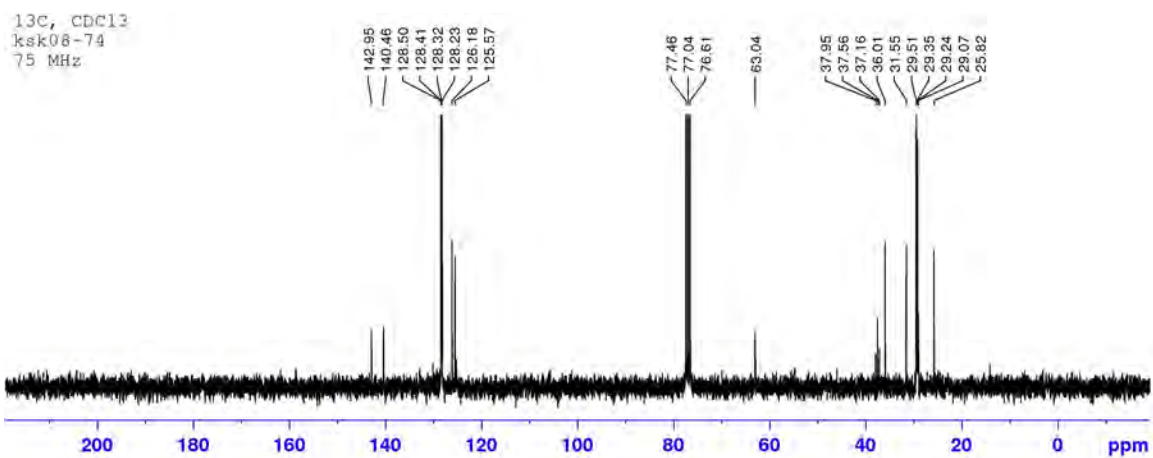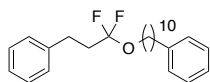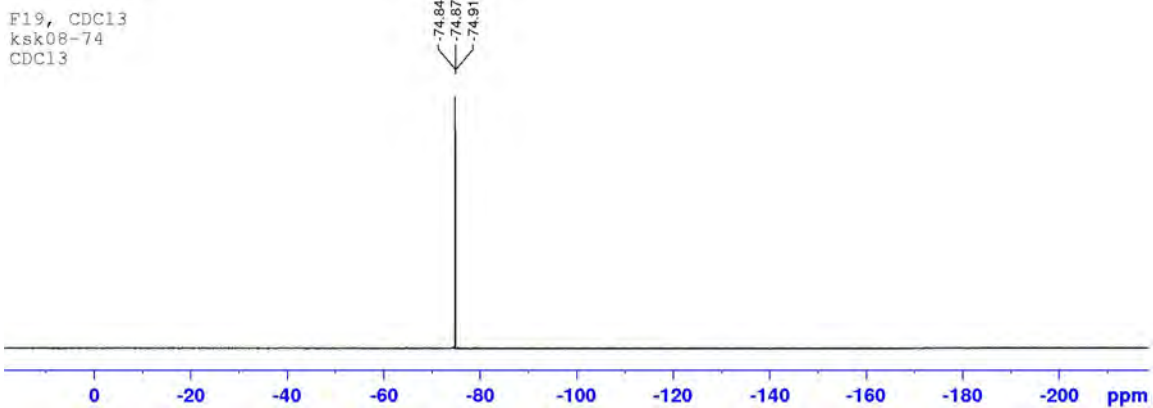



20

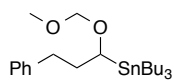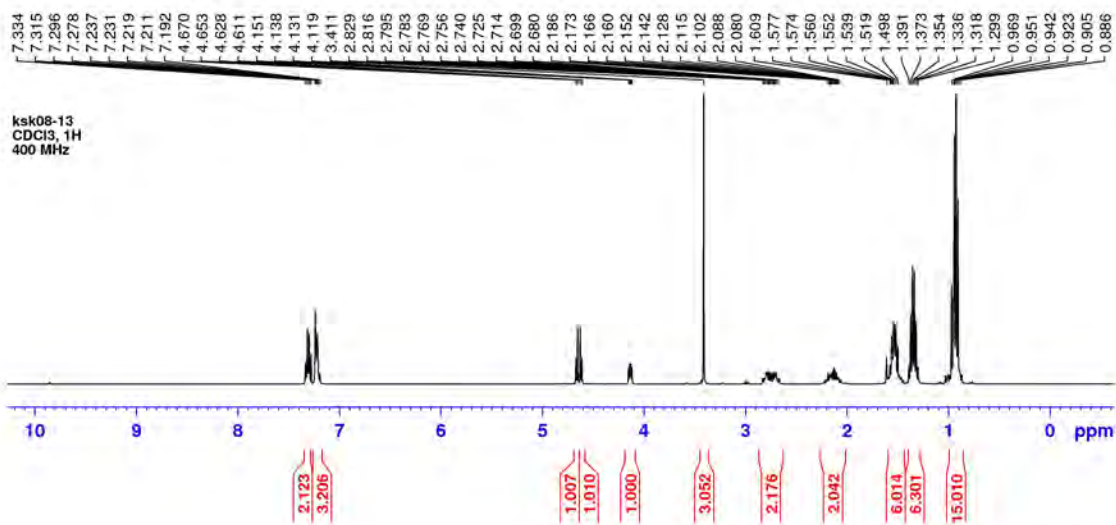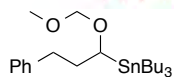

ksk08-13  
CDCl<sub>3</sub>, 13C  
100 MHz

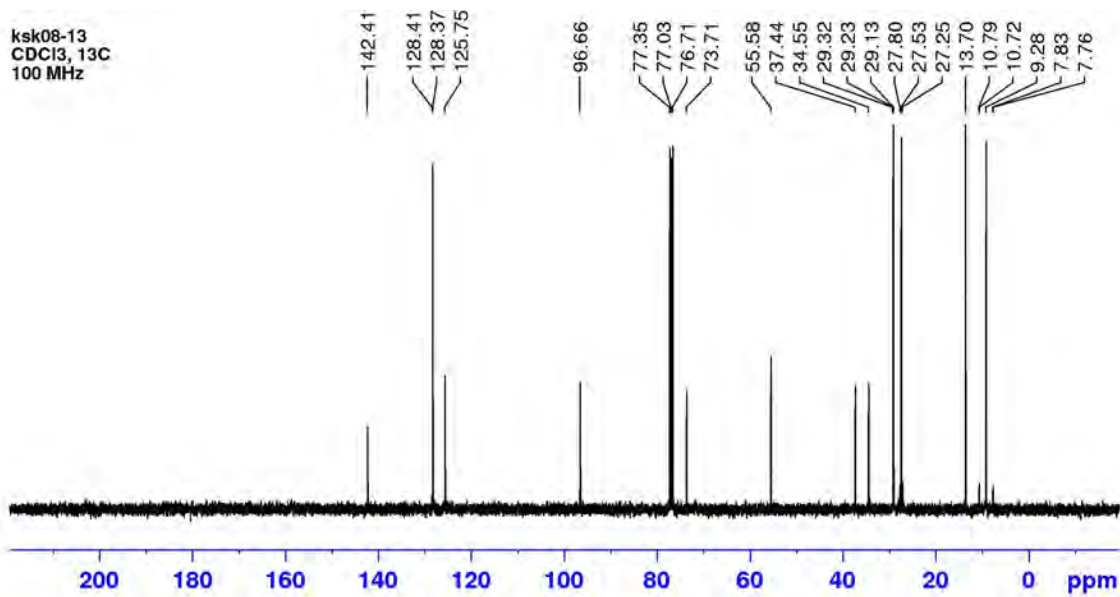

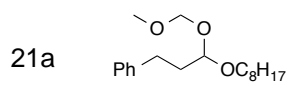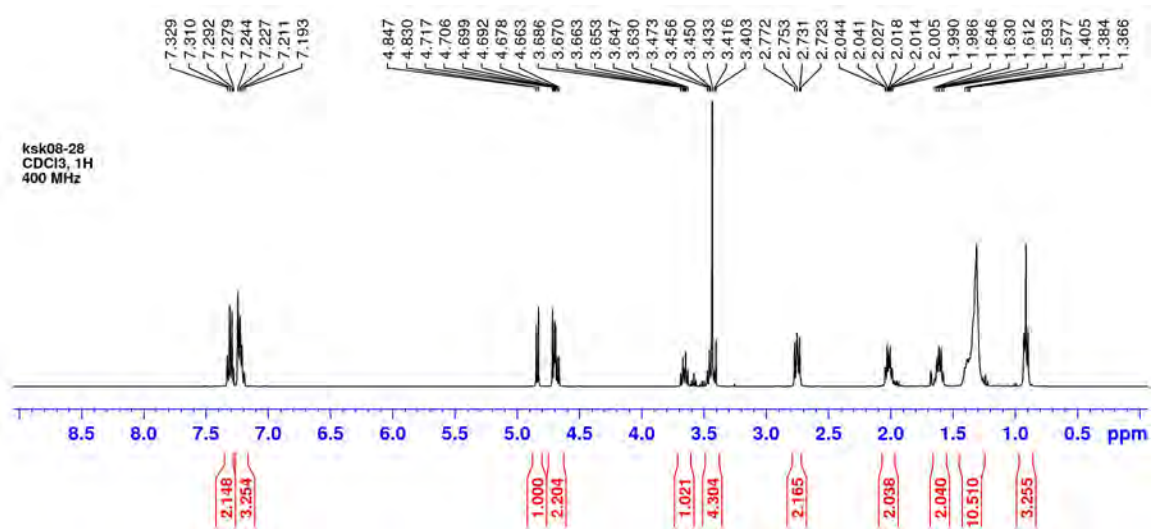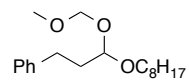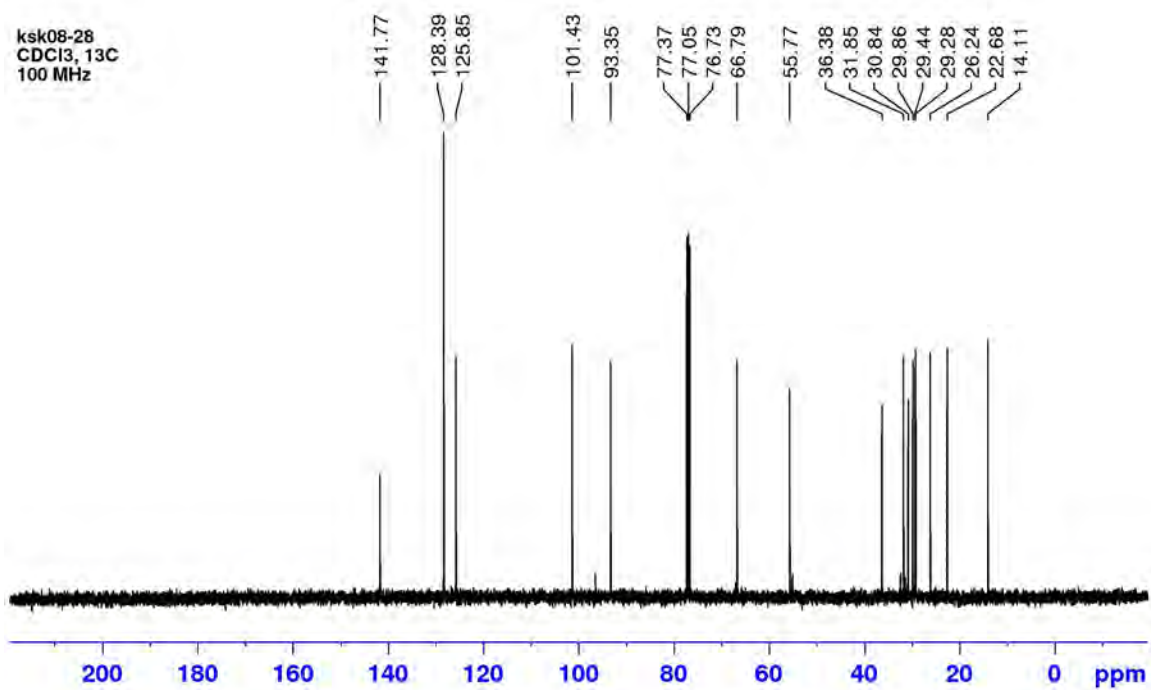

21b

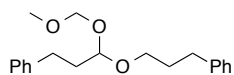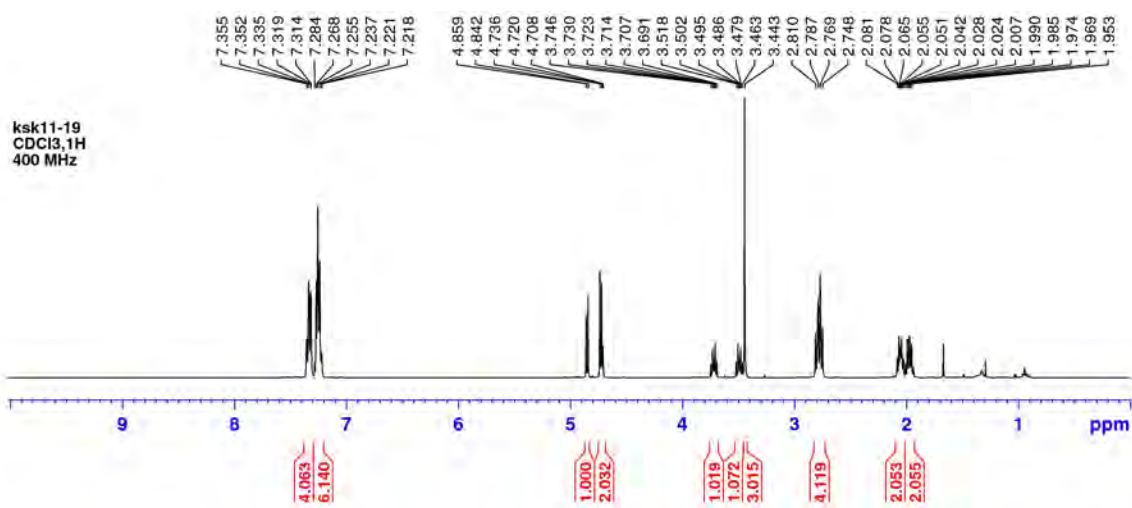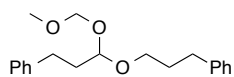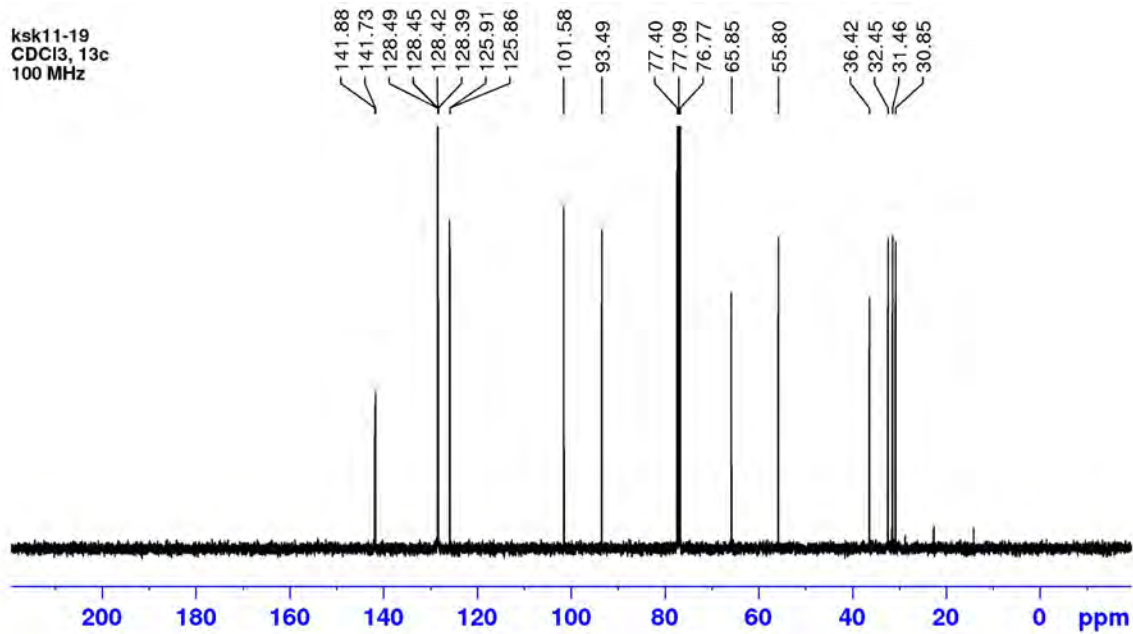

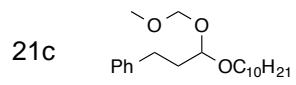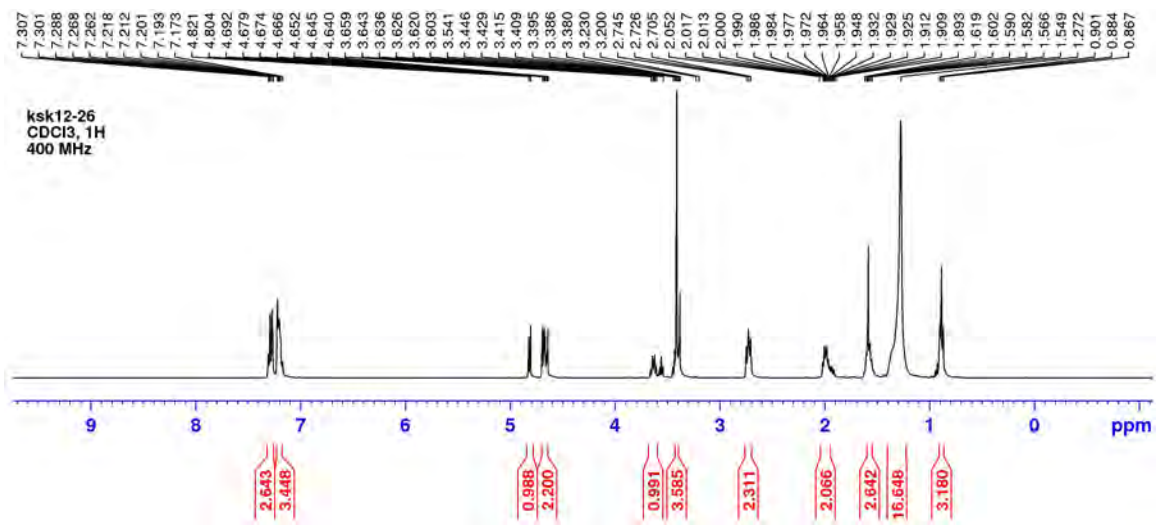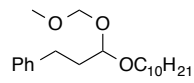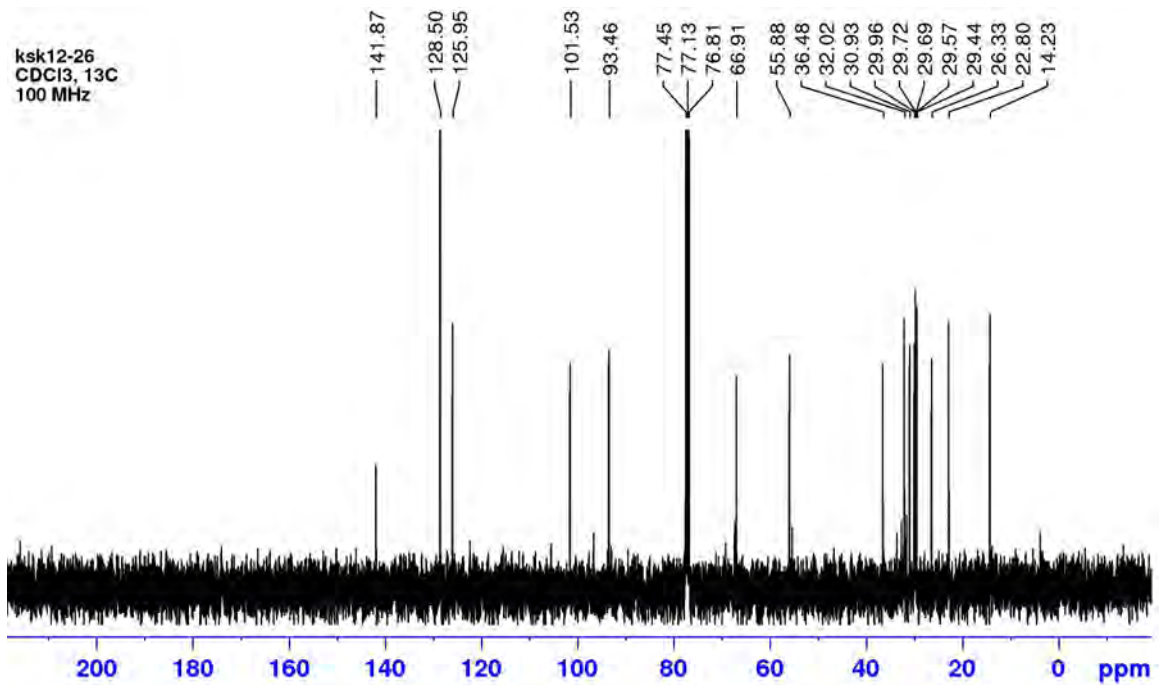

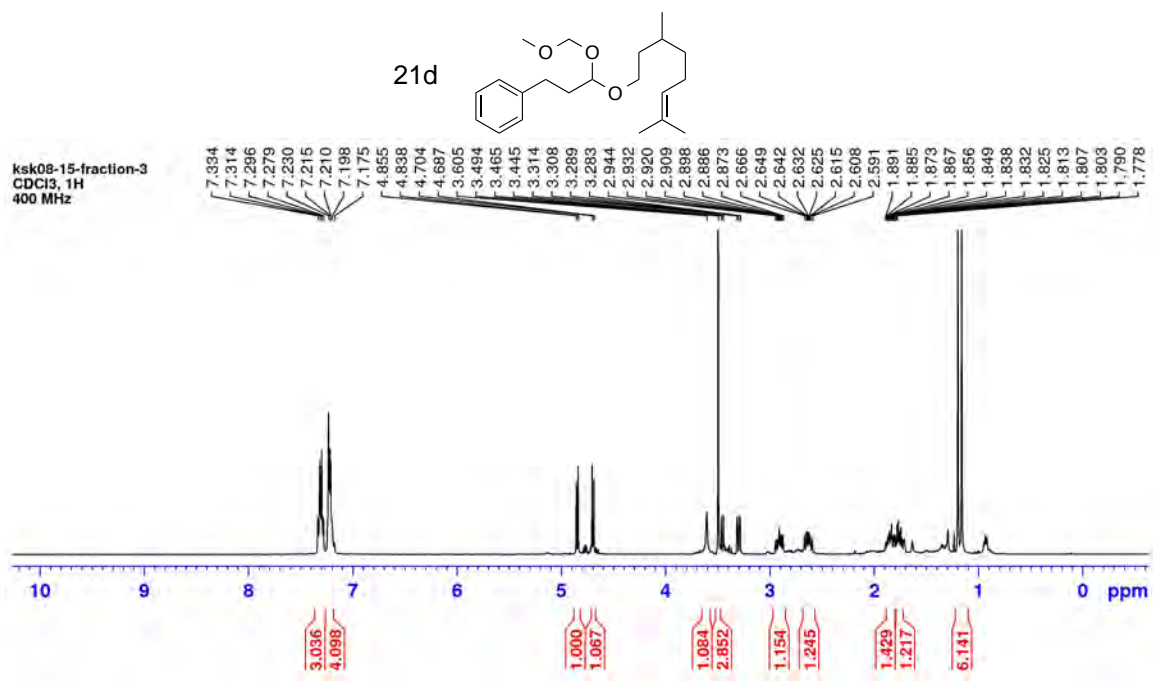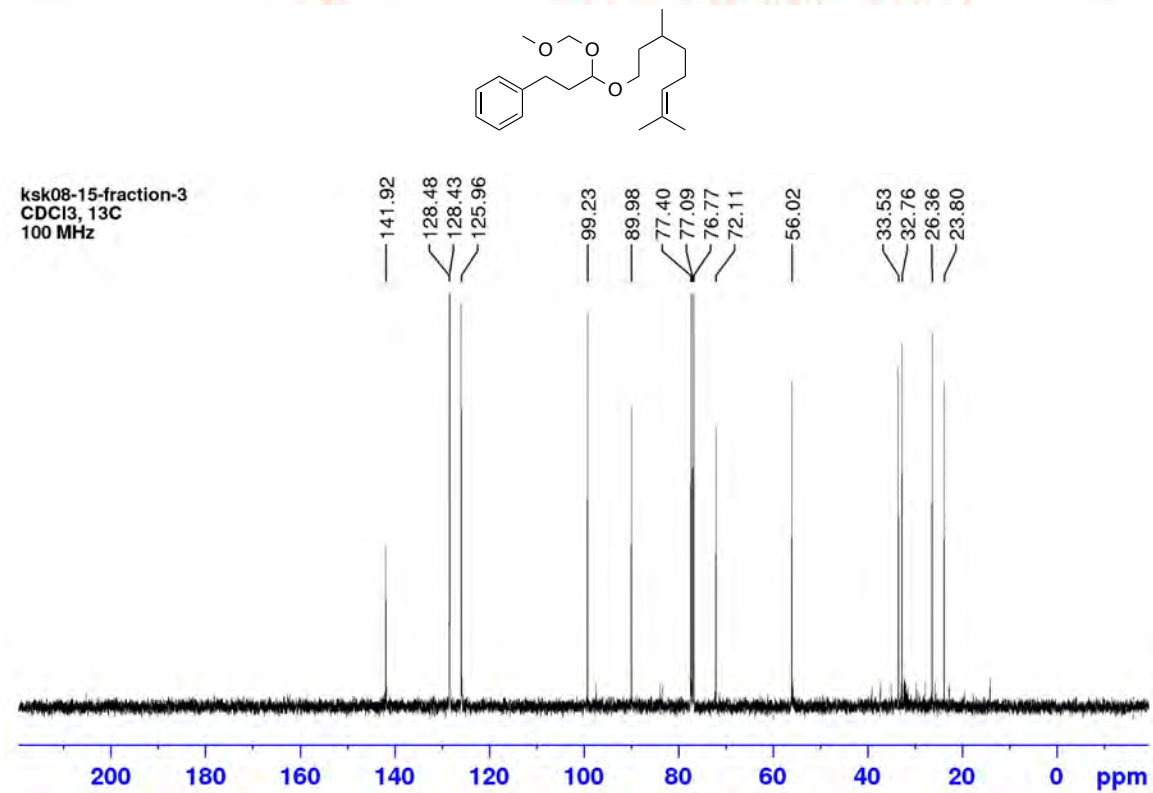

22

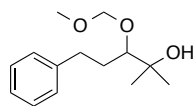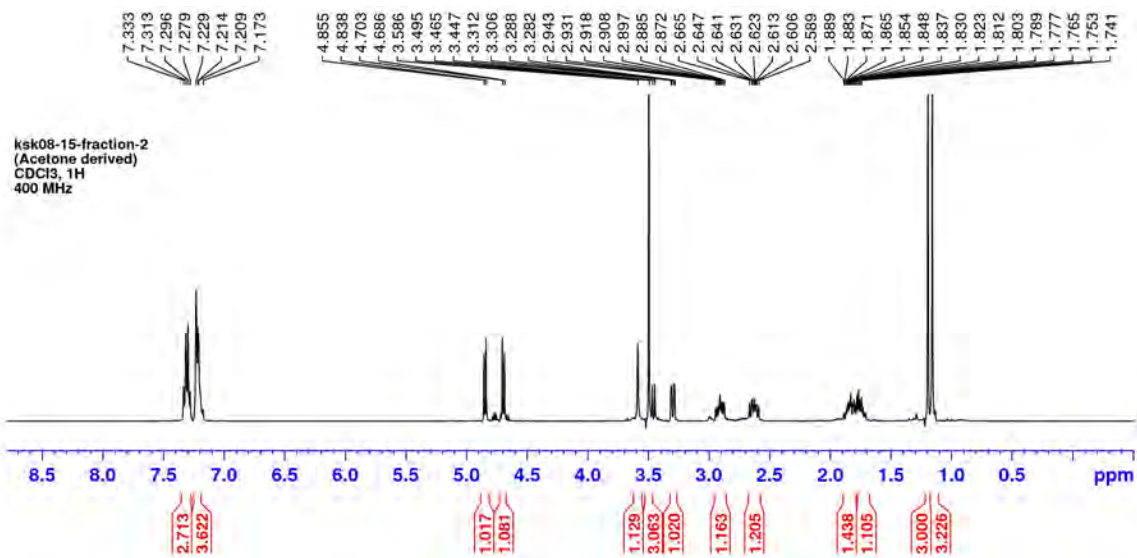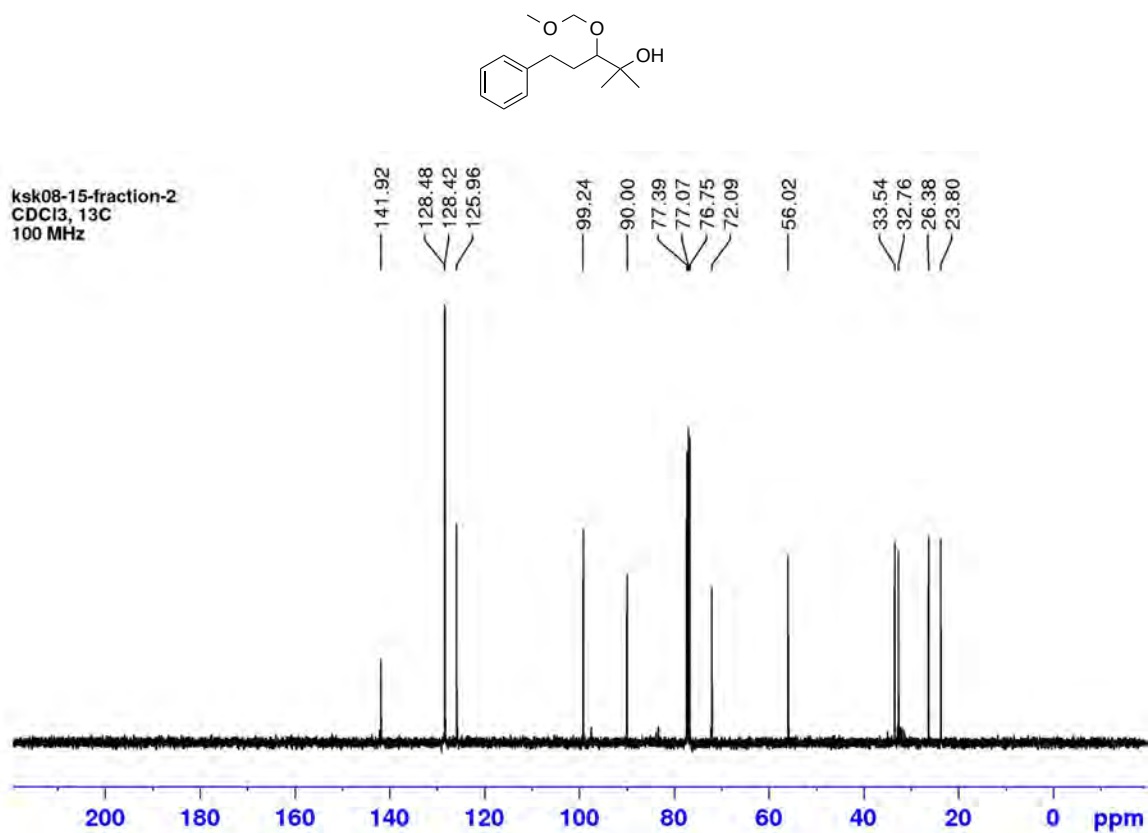



PhCH<sub>2</sub>CH<sub>2</sub>CH<sub>2</sub>OCH<sub>2</sub>OMe

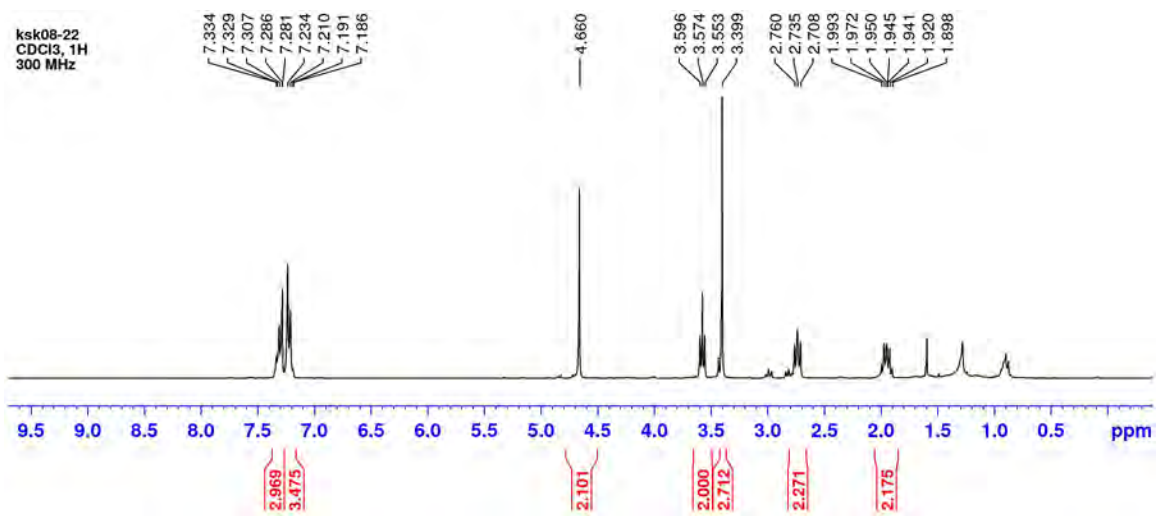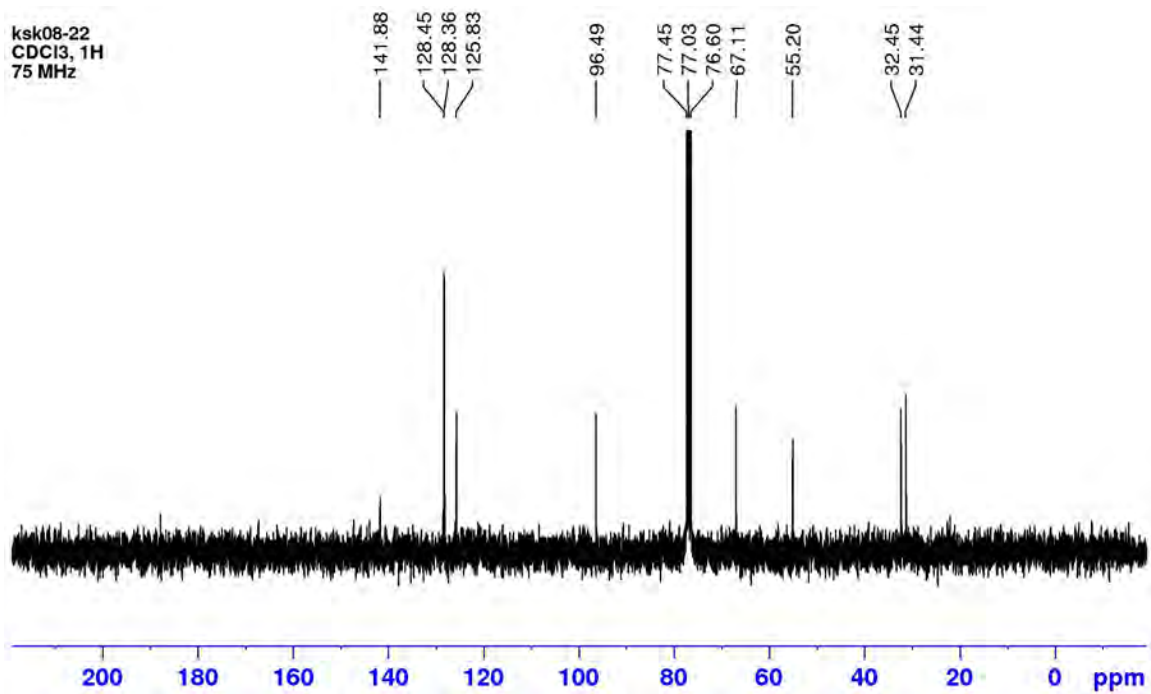

23a

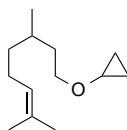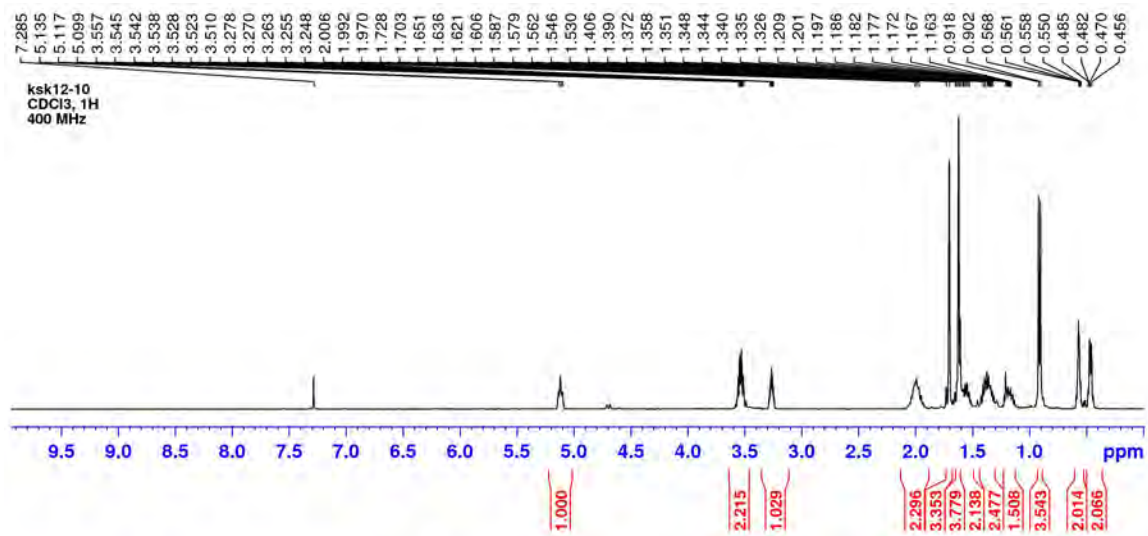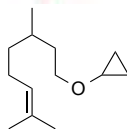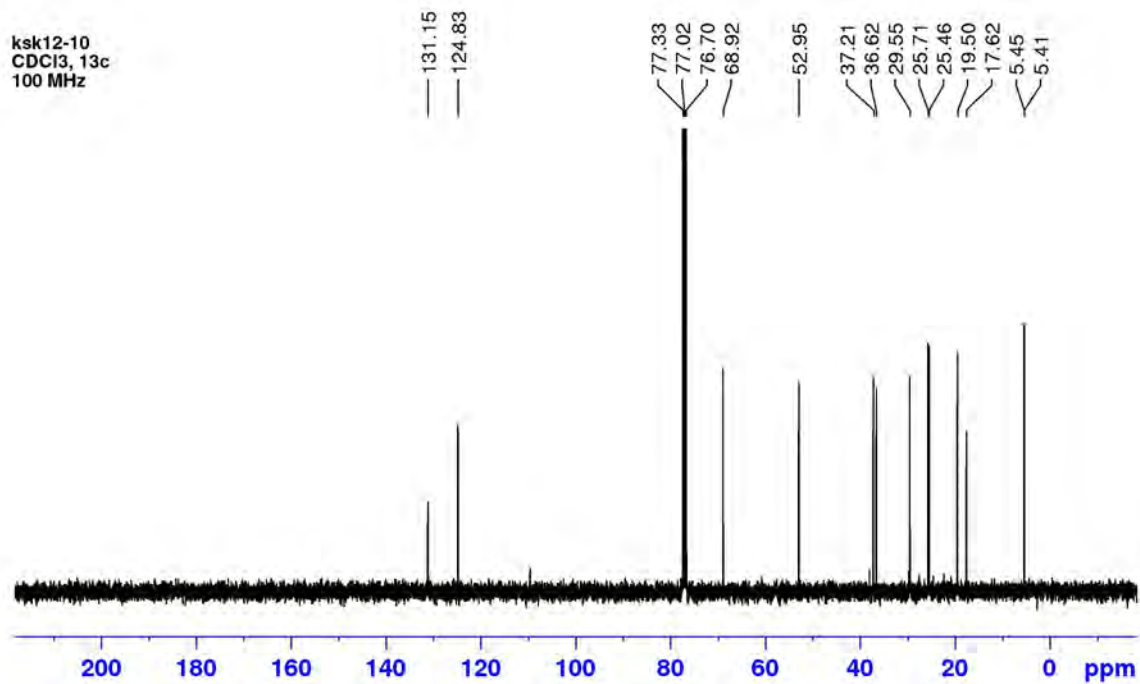



23b

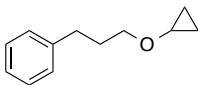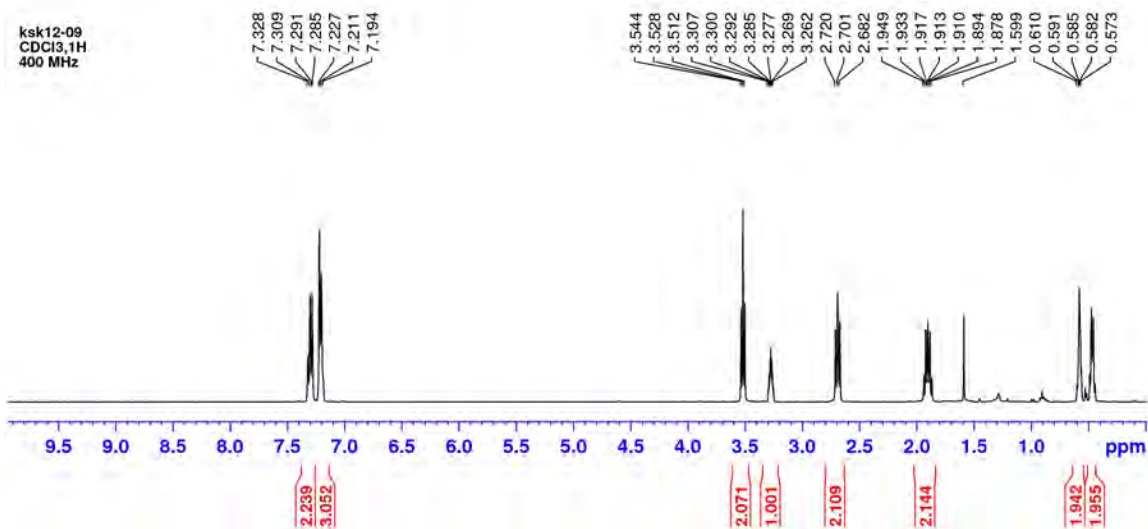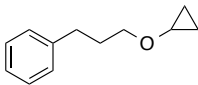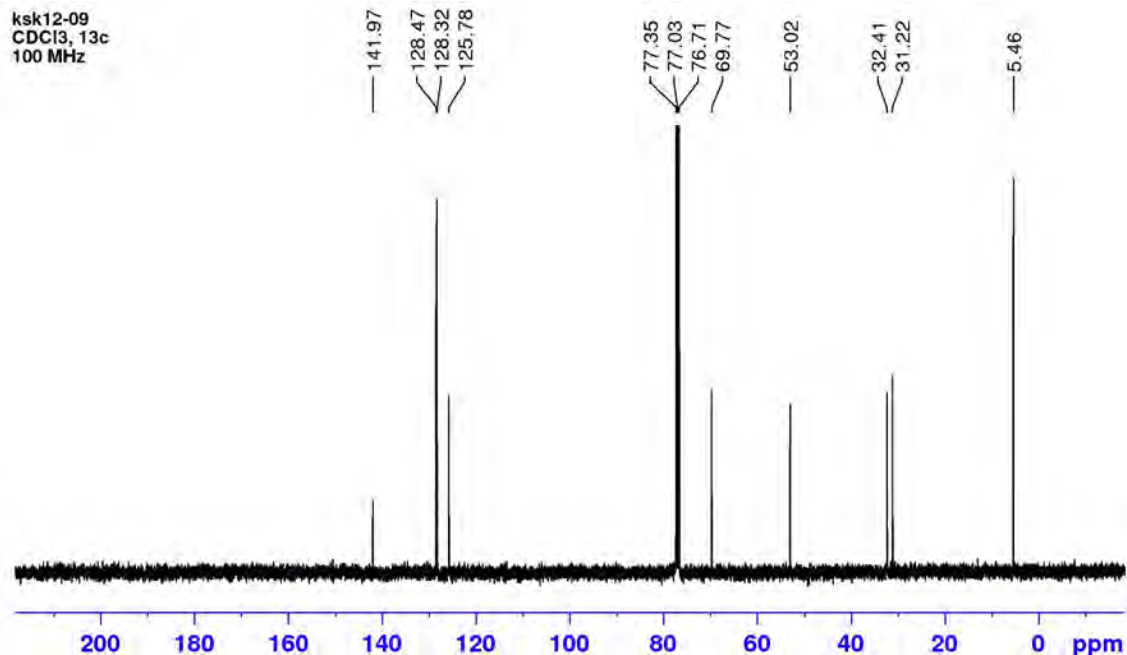

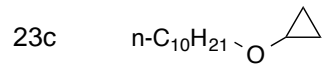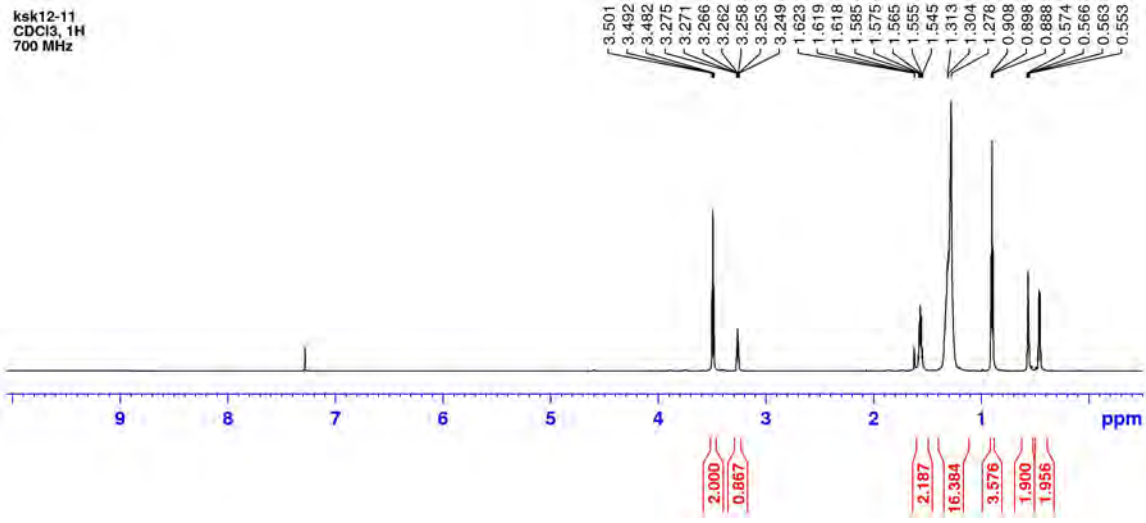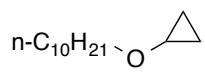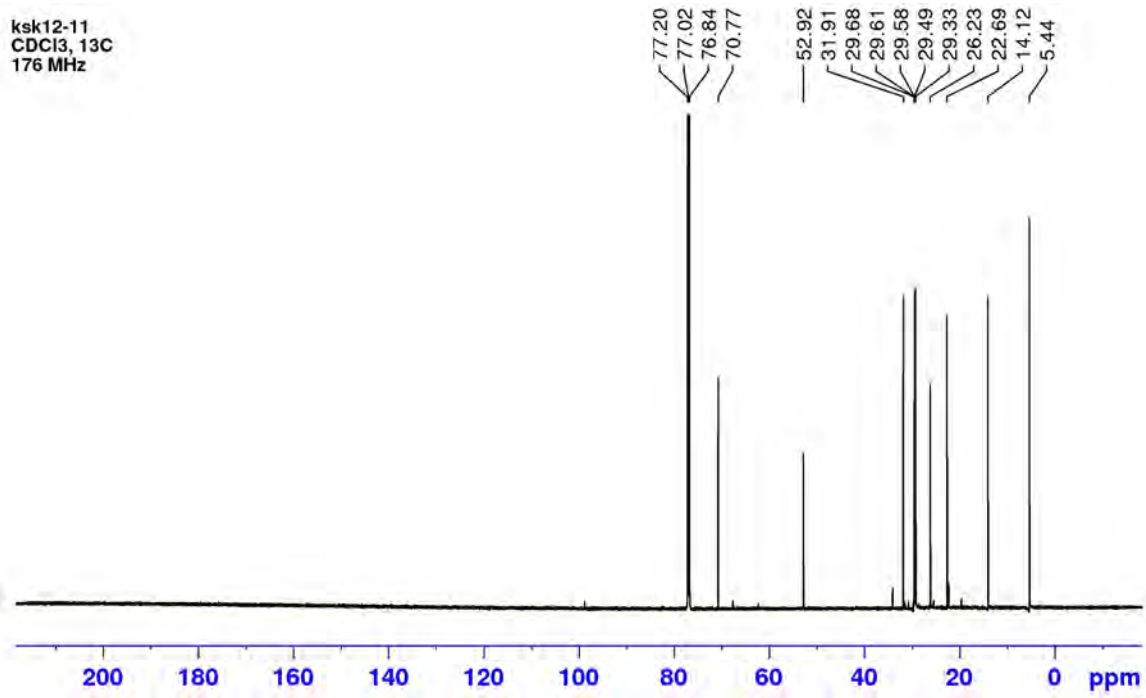

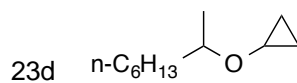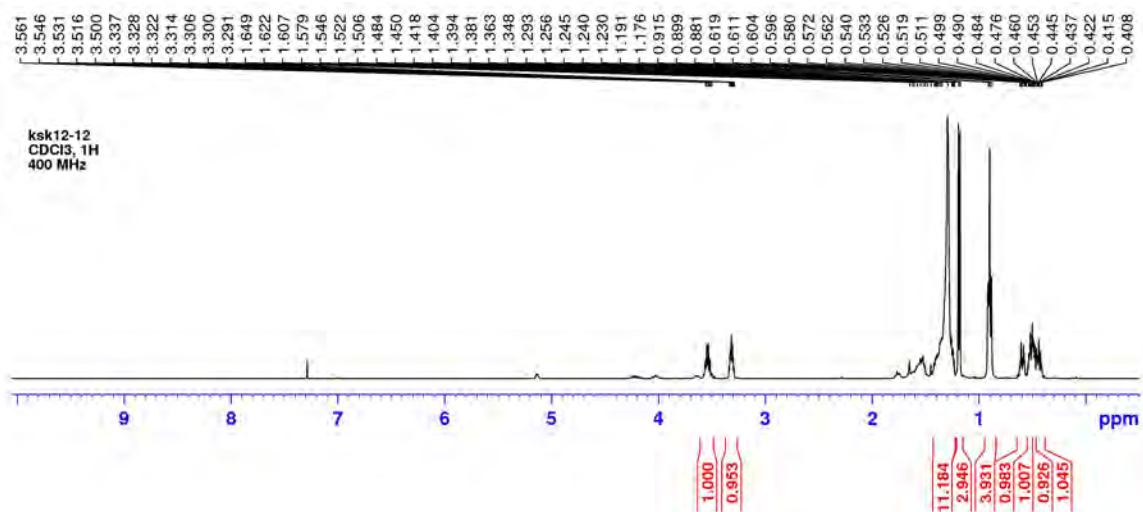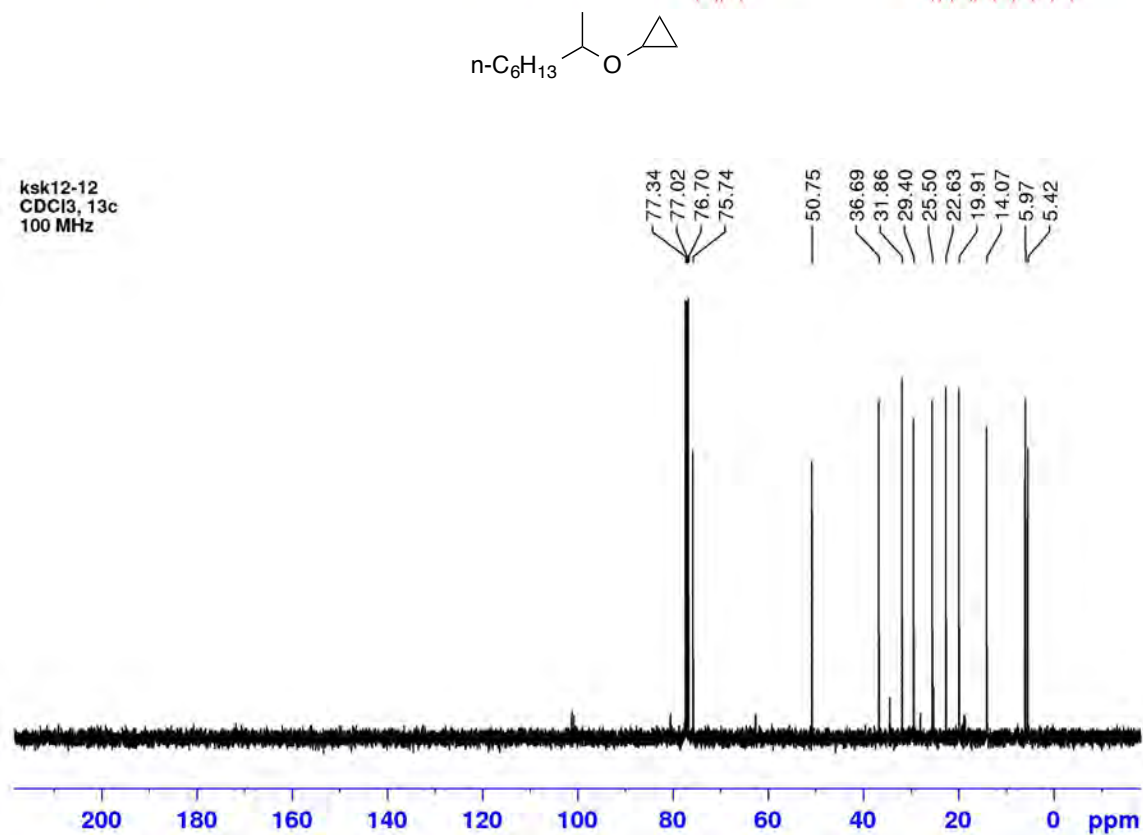

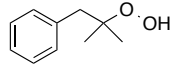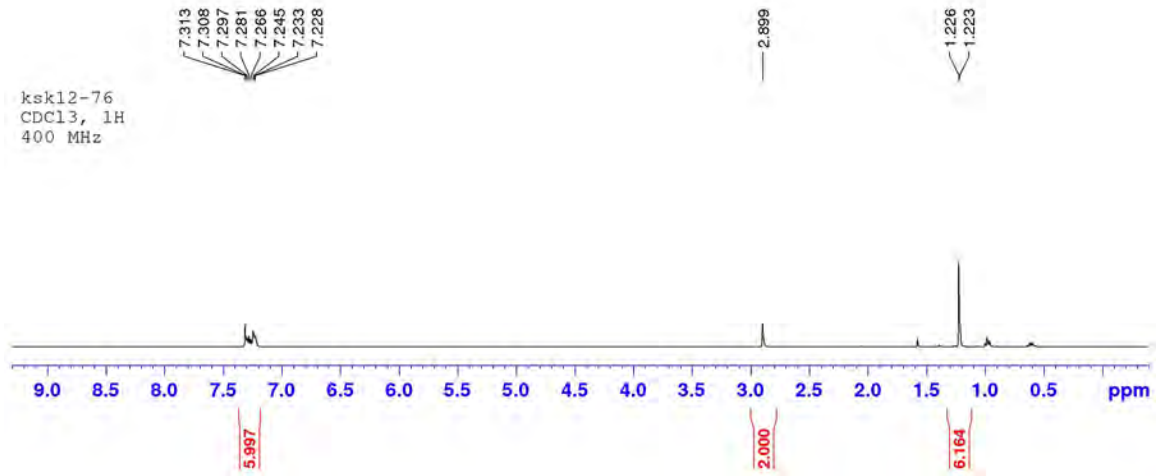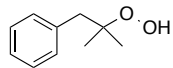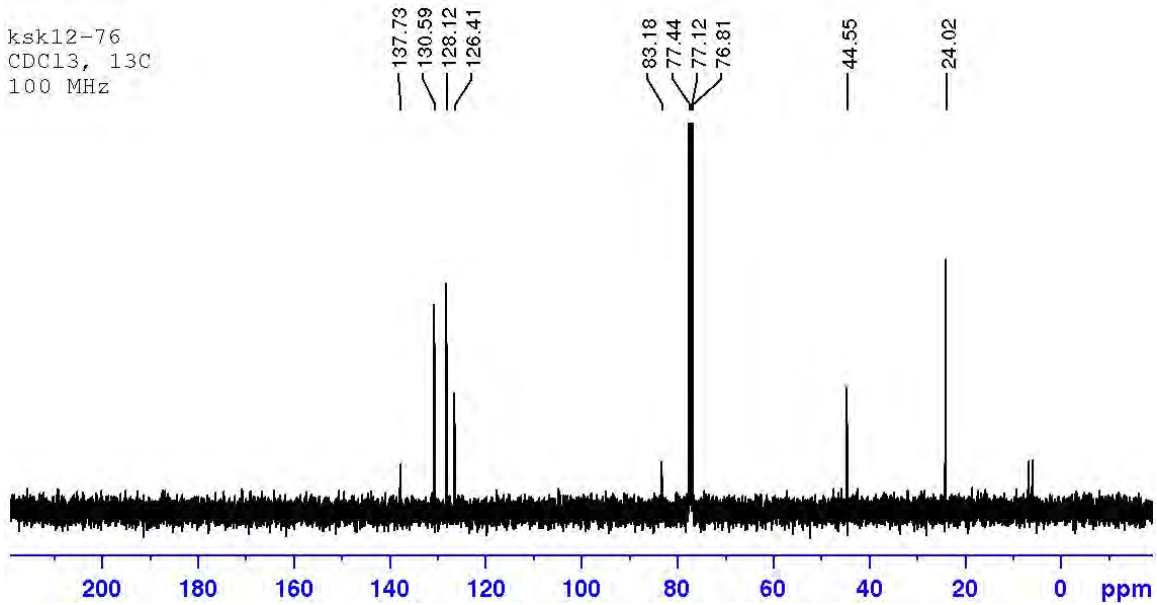

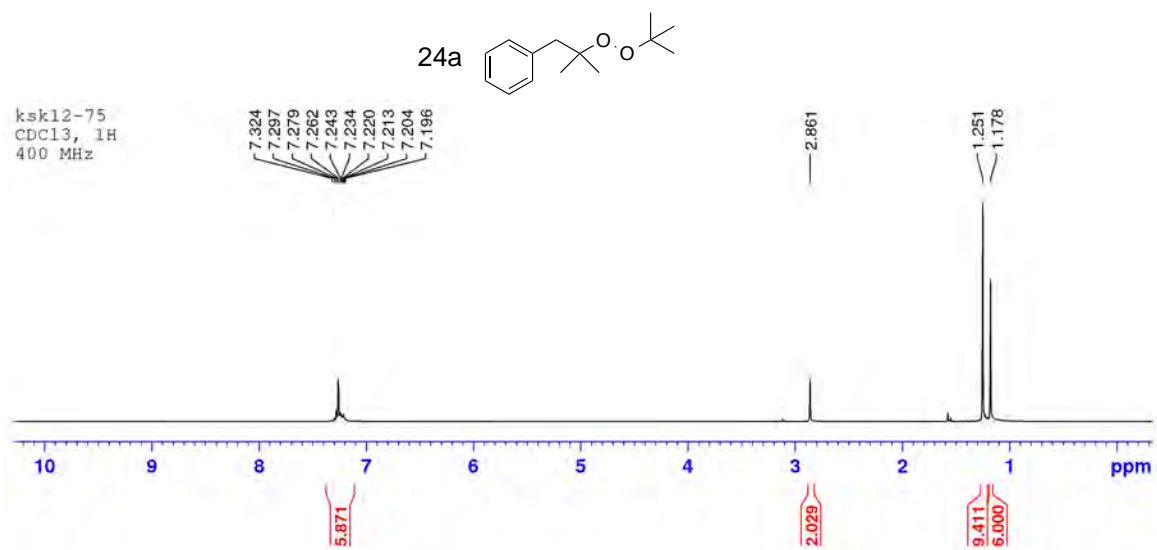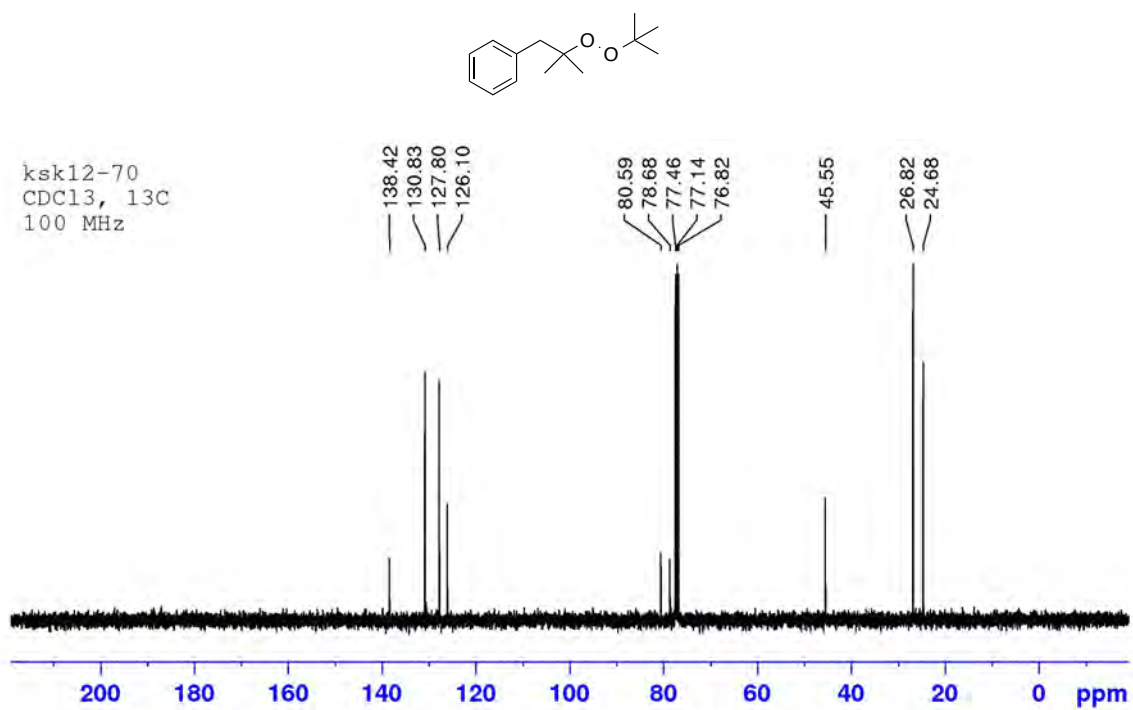

24b

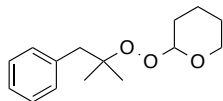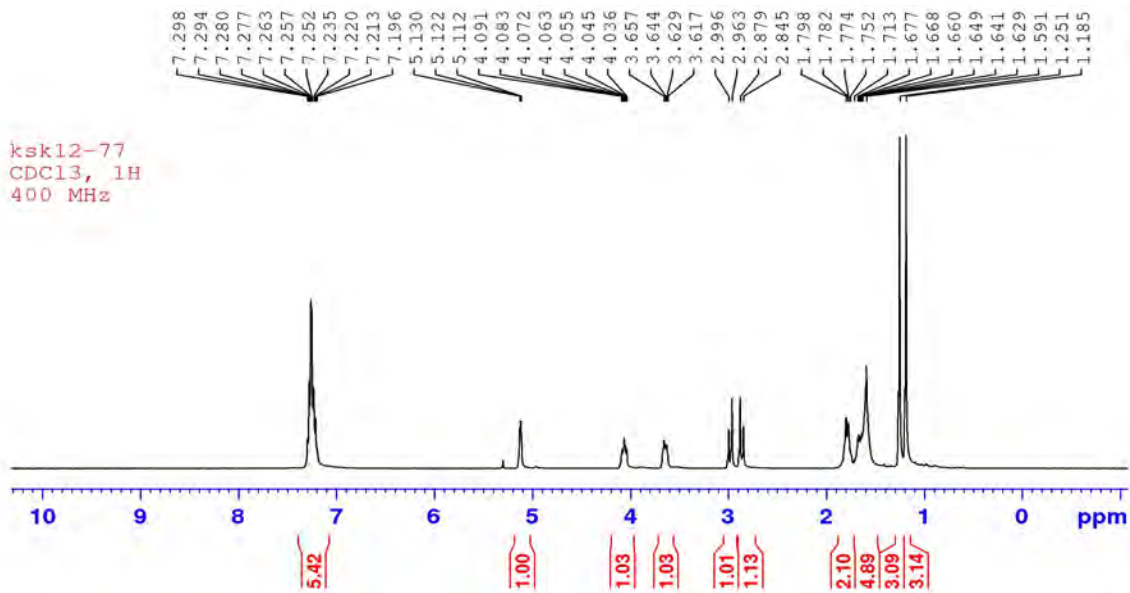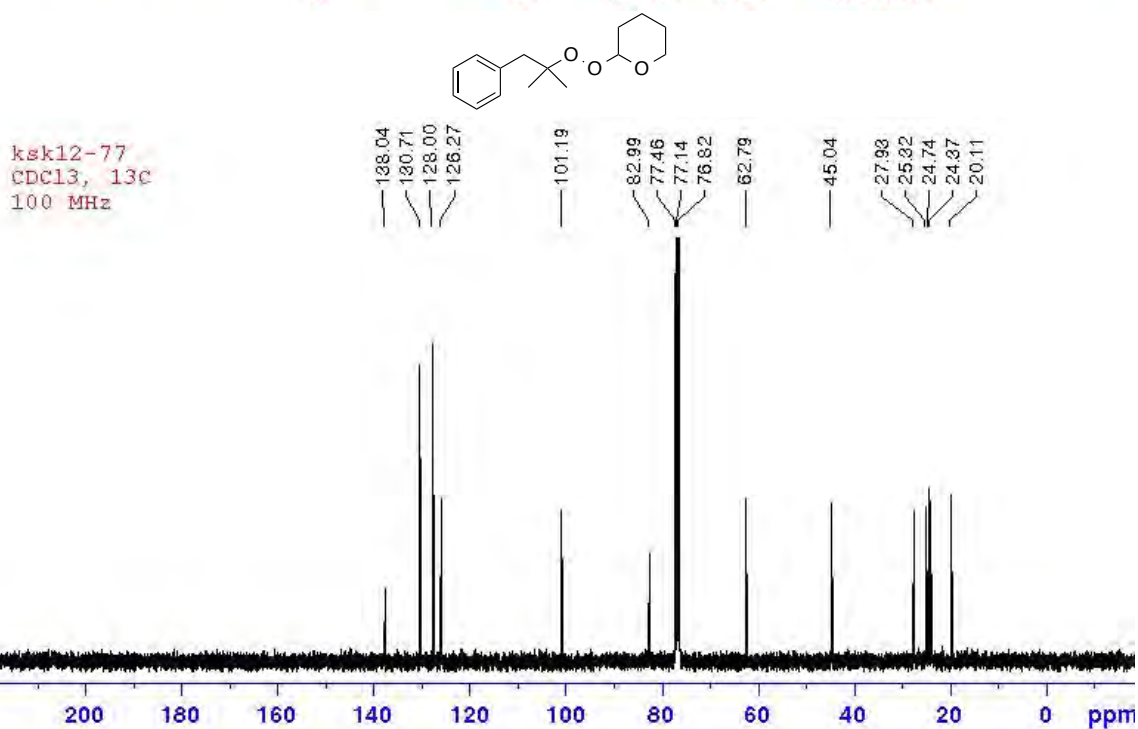

24d

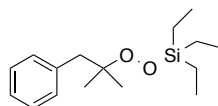

7.290  
7.286  
7.269  
7.267  
7.249  
7.244  
7.231  
7.227  
7.210  
7.206  
7.197  
7.194  
7.189

2.882  
2.879  
1.171  
1.166  
1.031  
1.027  
1.011  
1.007  
0.992  
0.987  
0.980  
0.975  
0.960  
0.956  
0.736  
0.733  
0.718  
0.713  
0.698  
0.694  
0.677  
0.674

ksk12-73  
CDCl<sub>3</sub>, 1H  
400 MHz

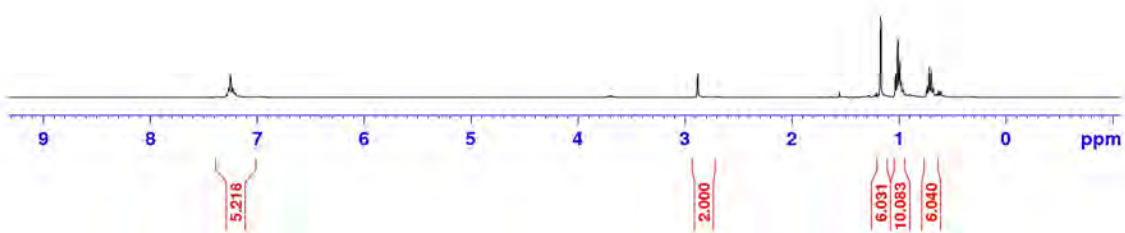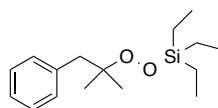

ksk12-73  
CDCl<sub>3</sub>, 13C  
100 MHz

138.30  
130.81  
127.78  
126.10

82.65  
77.44  
77.12  
76.81

44.85

24.36

6.92  
4.05

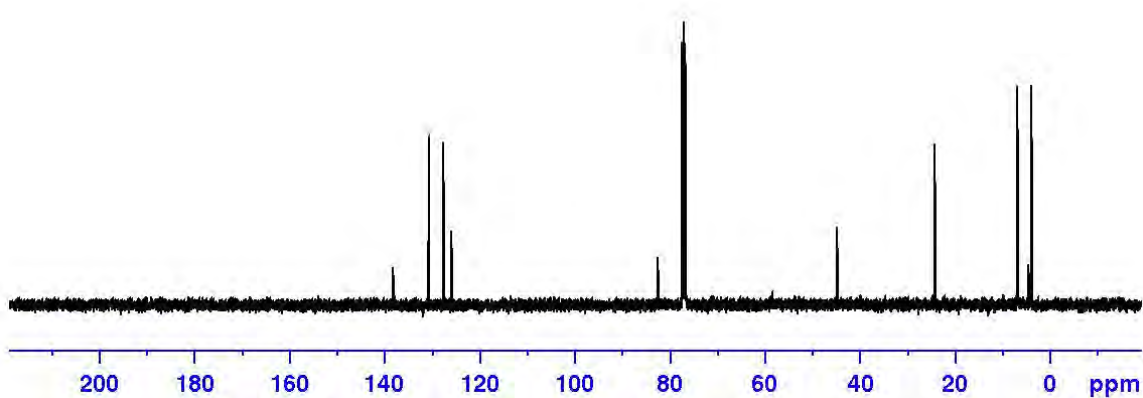



25a

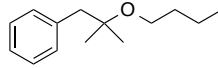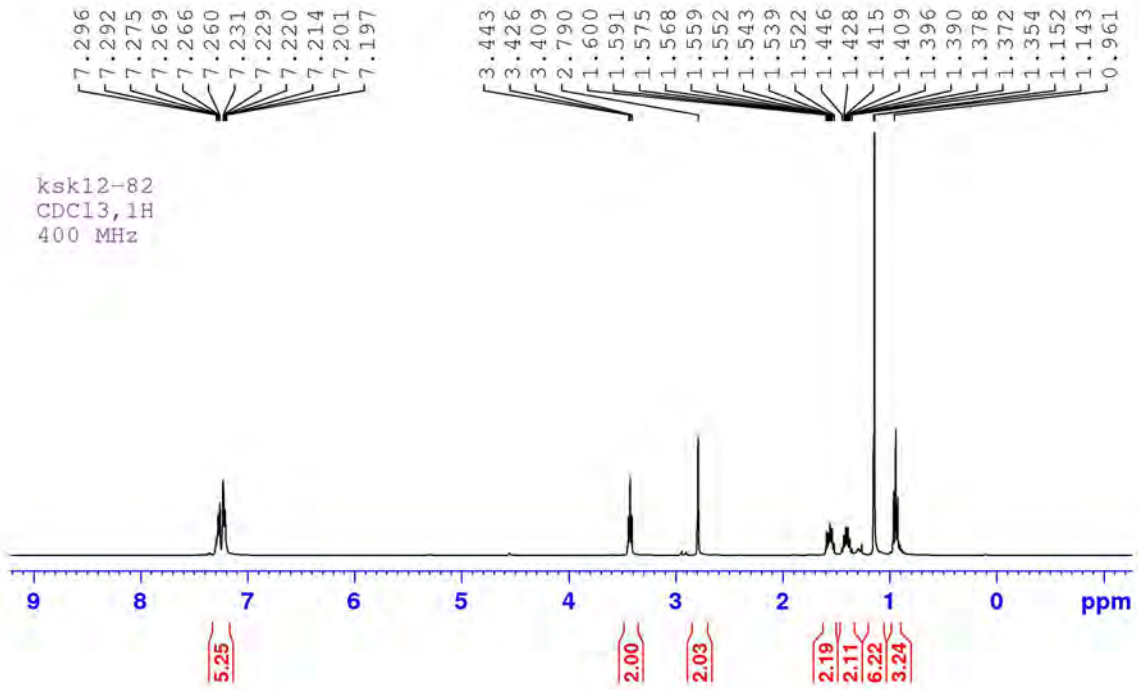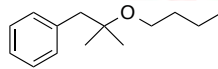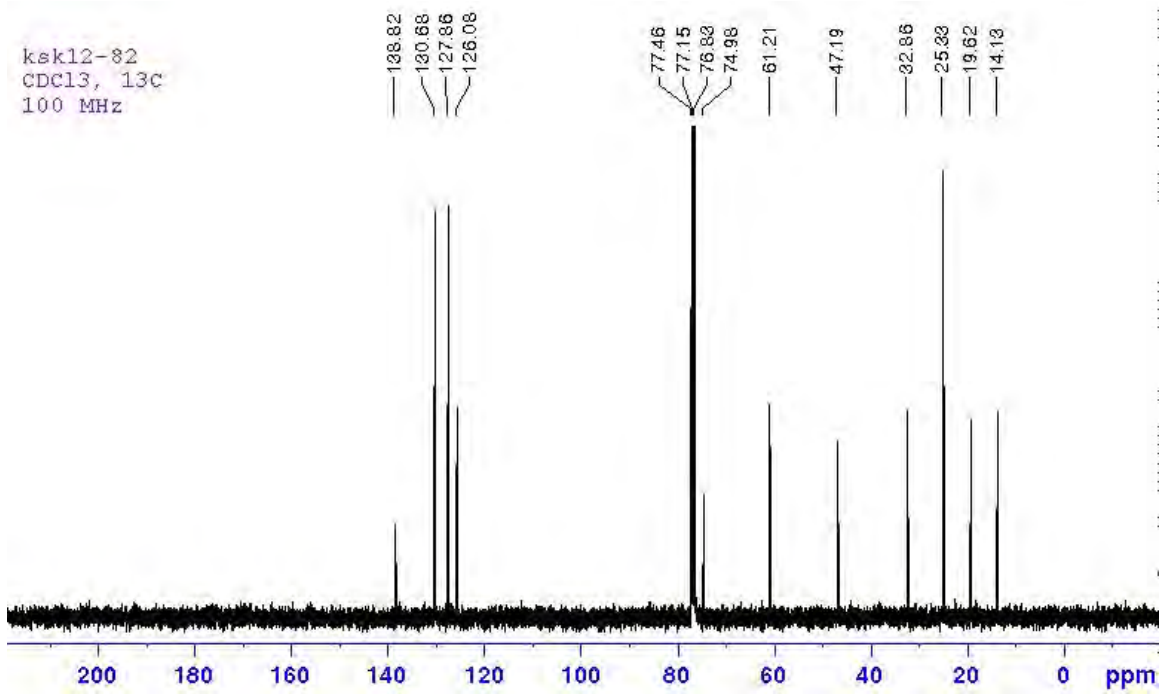



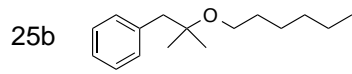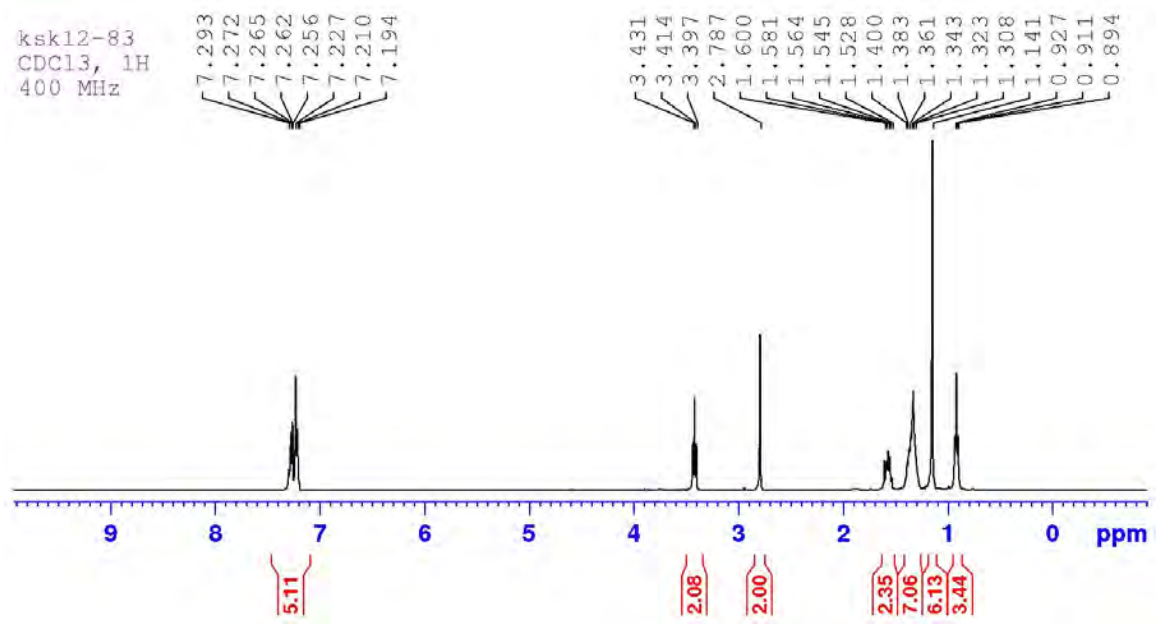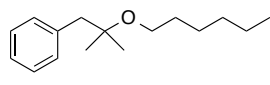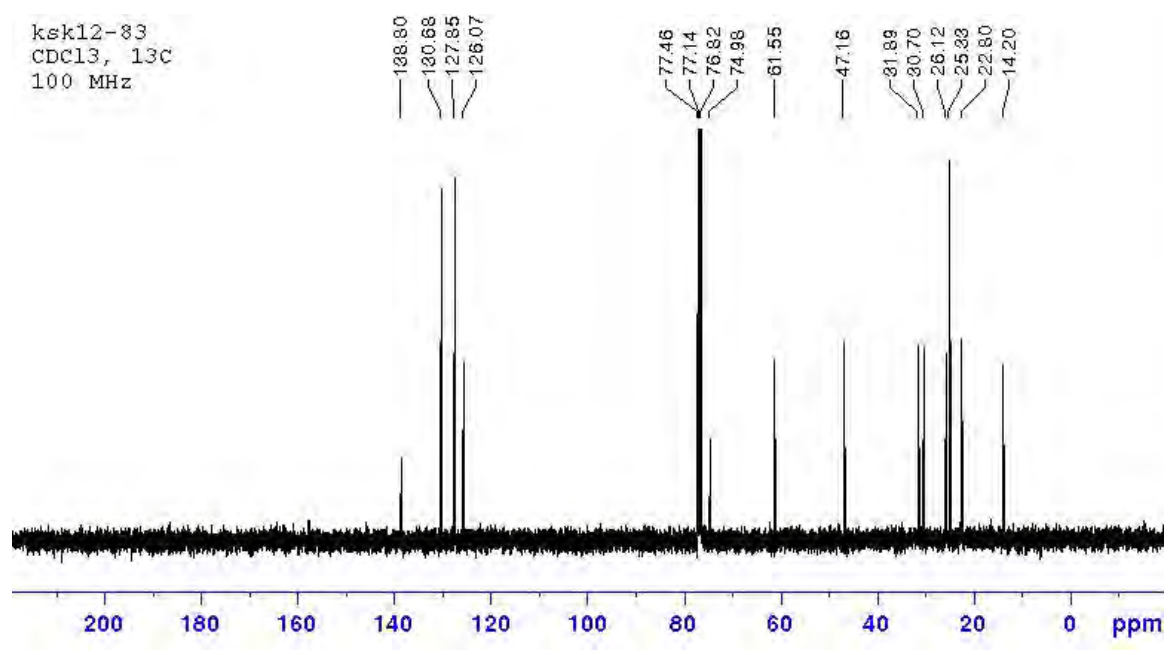

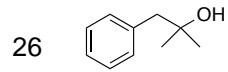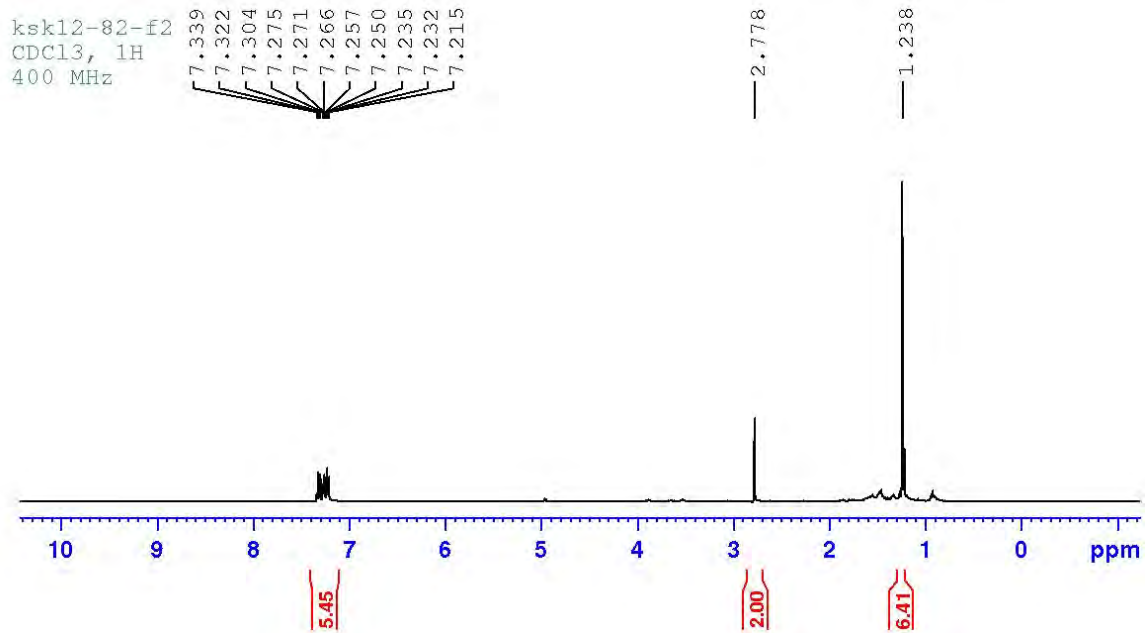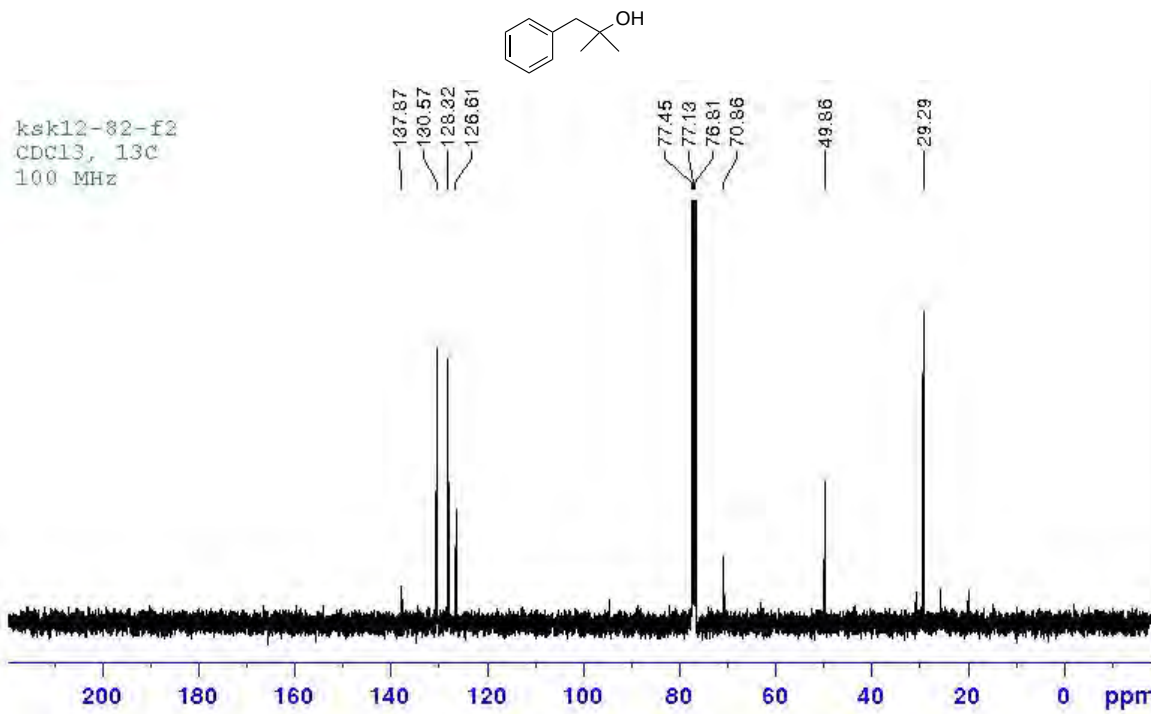

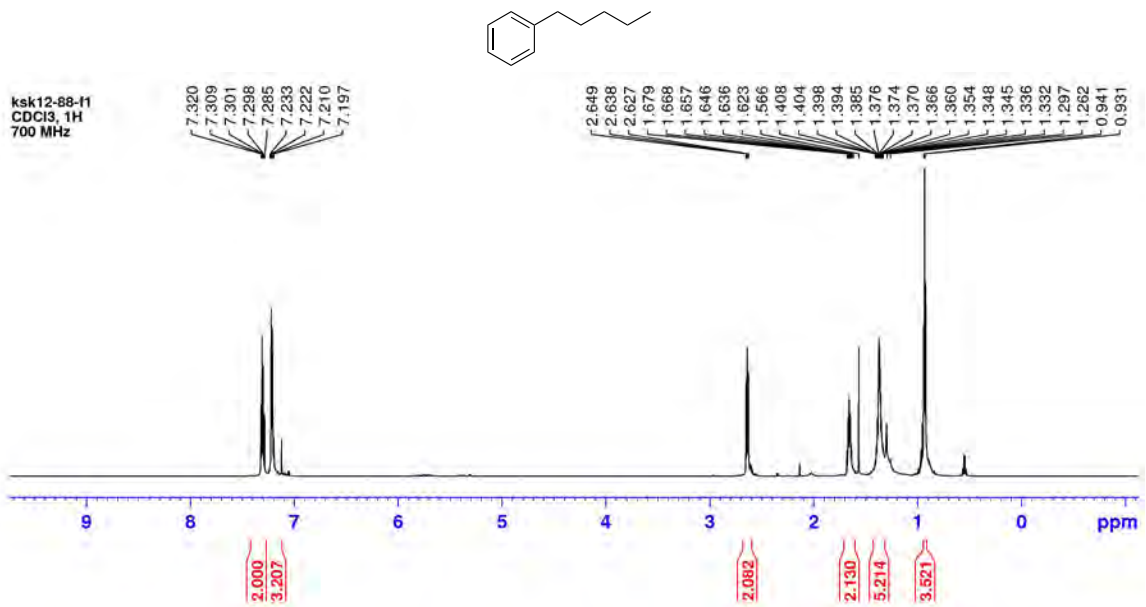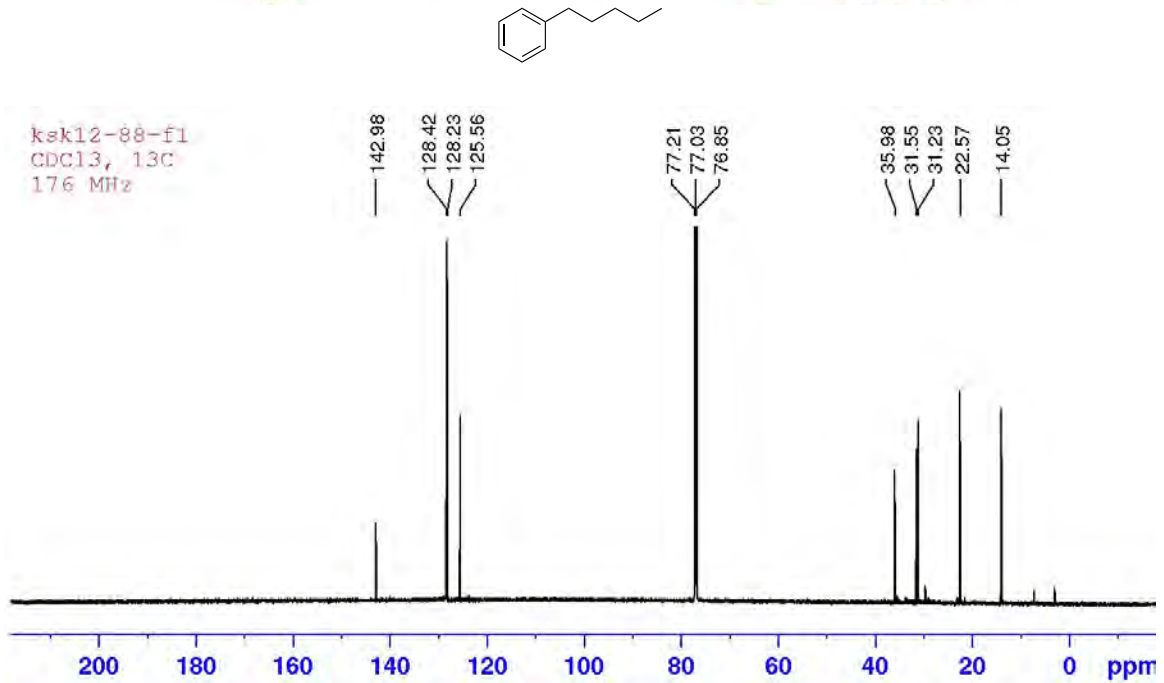

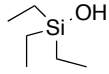

ksk12-88-f4  
CDCl<sub>3</sub>, 1H  
400 MHz

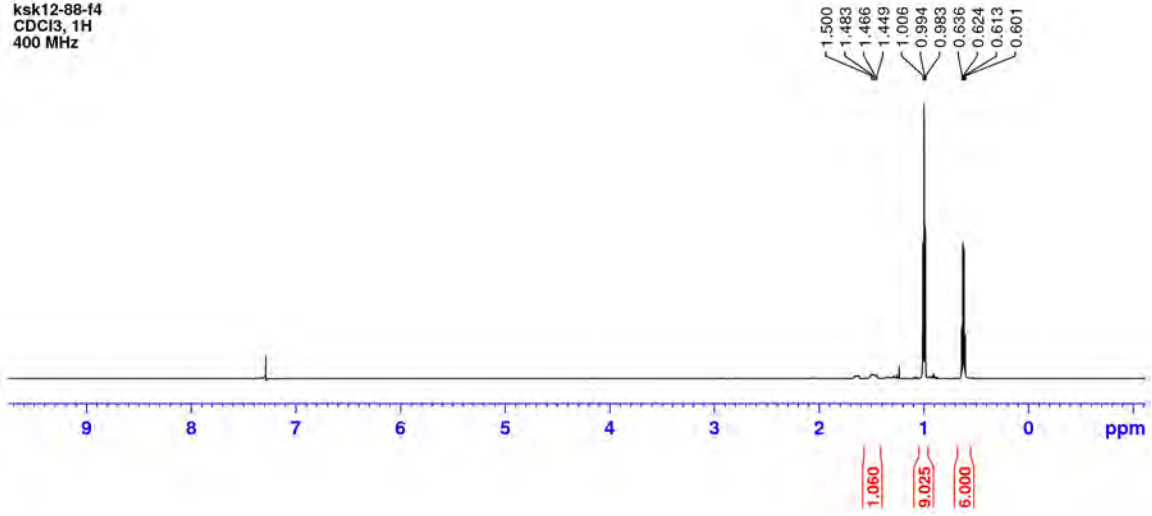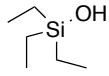

ksk12-88-f4  
CDCl<sub>3</sub>, 13C  
176 MHz

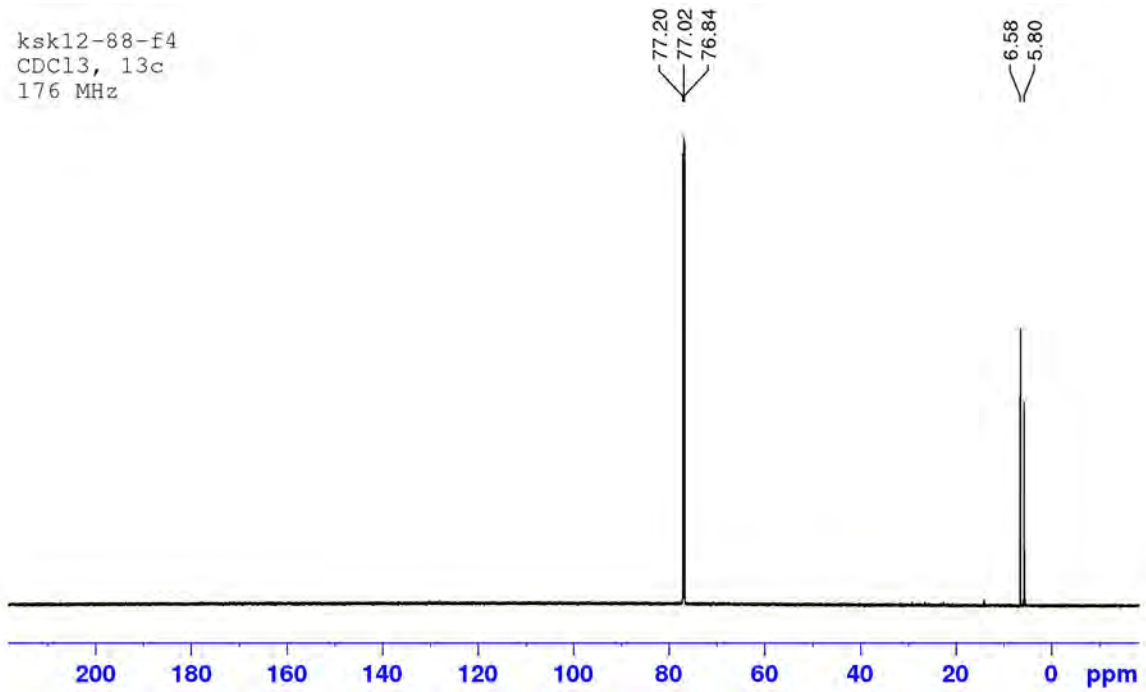

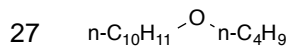

ksk12-84-f1  
CDCl3, 1H  
400 MHz

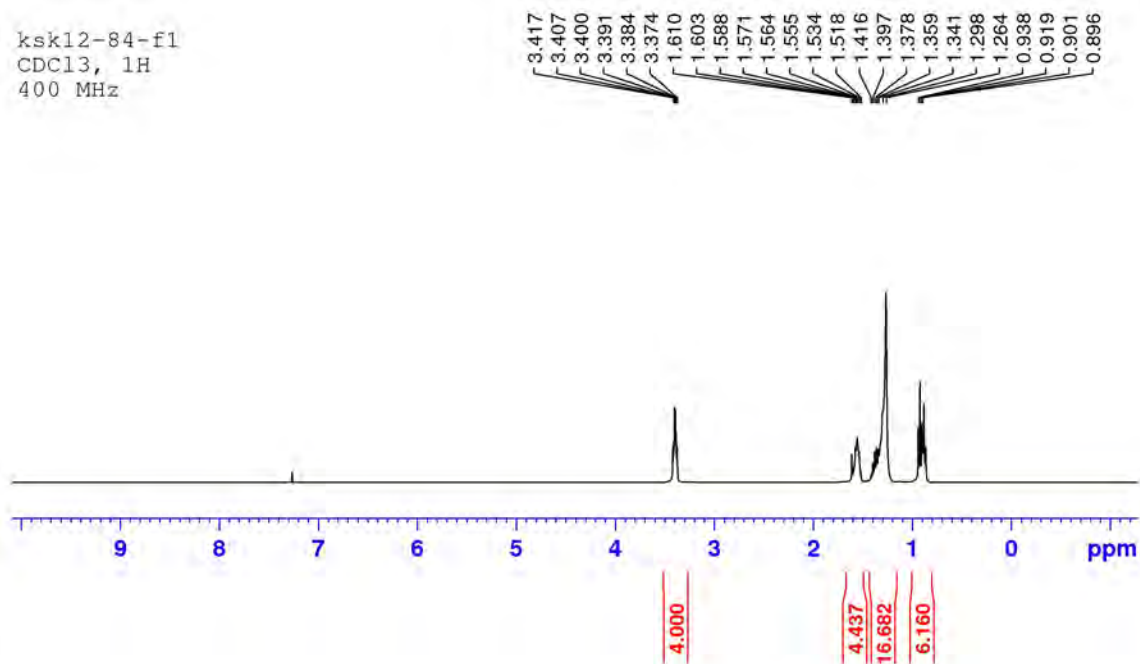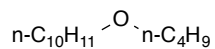

ksk12-84-f1  
CDCl3, 13C  
100 MHz

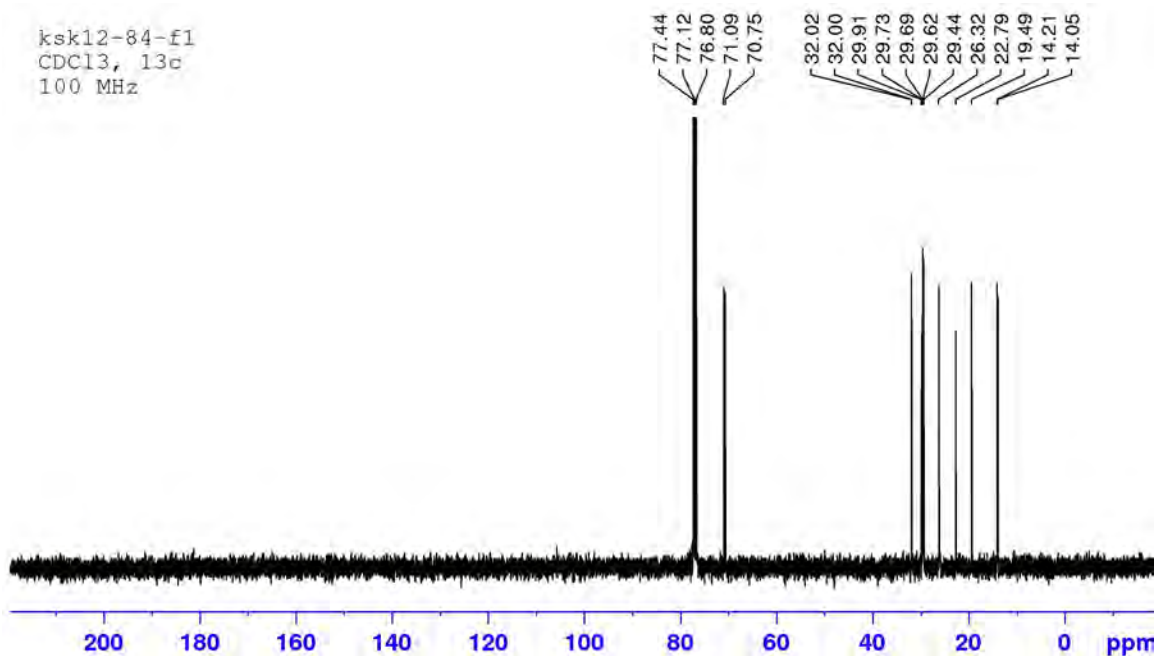

28

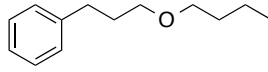

ksk10-65-f1  
CDCl<sub>3</sub>, 1H  
400 MHz

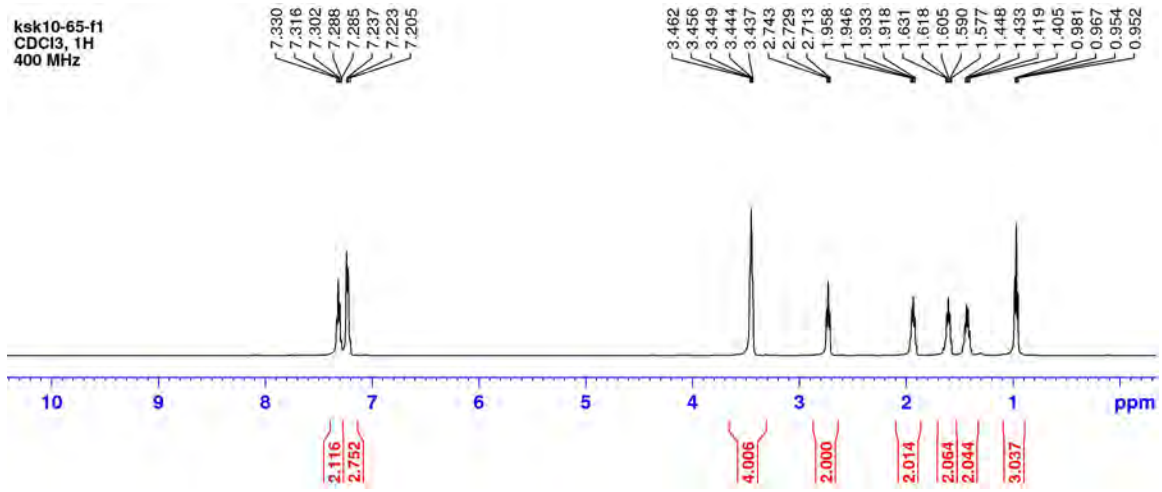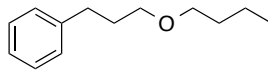

ksk10-65-f1  
CDCl<sub>3</sub>, 13C  
125 MHz

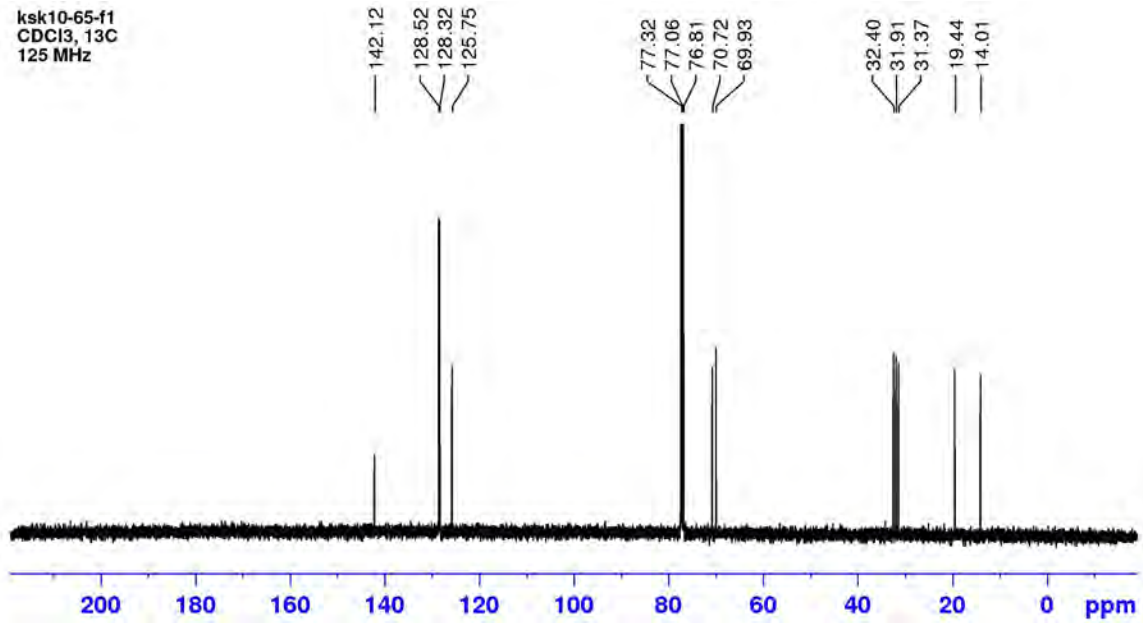

29

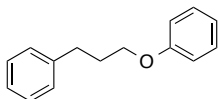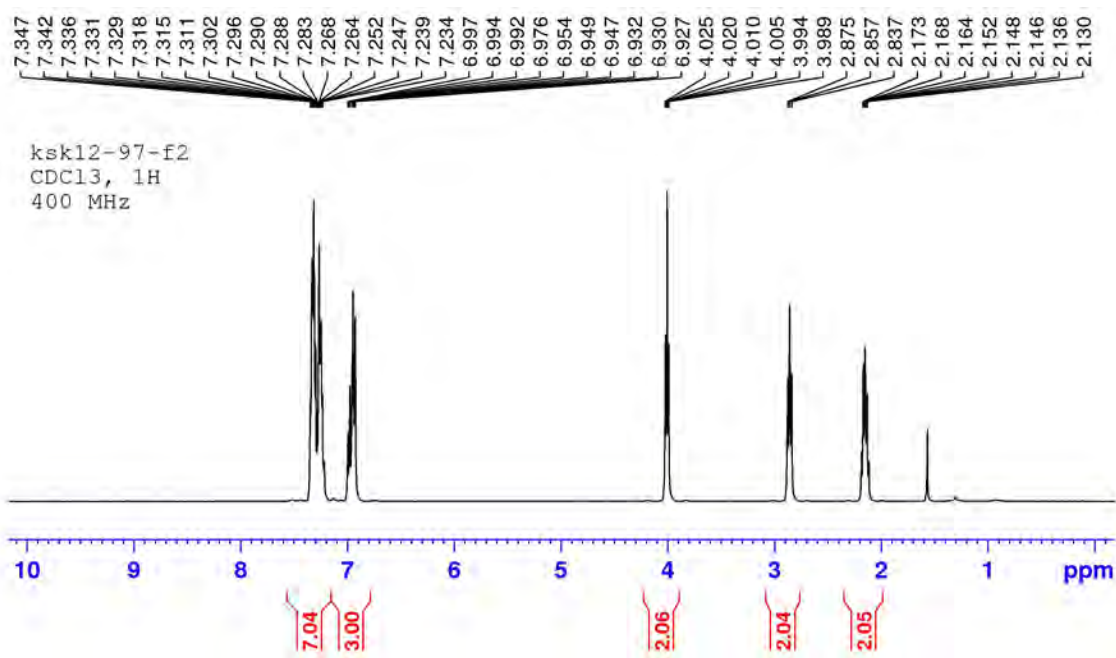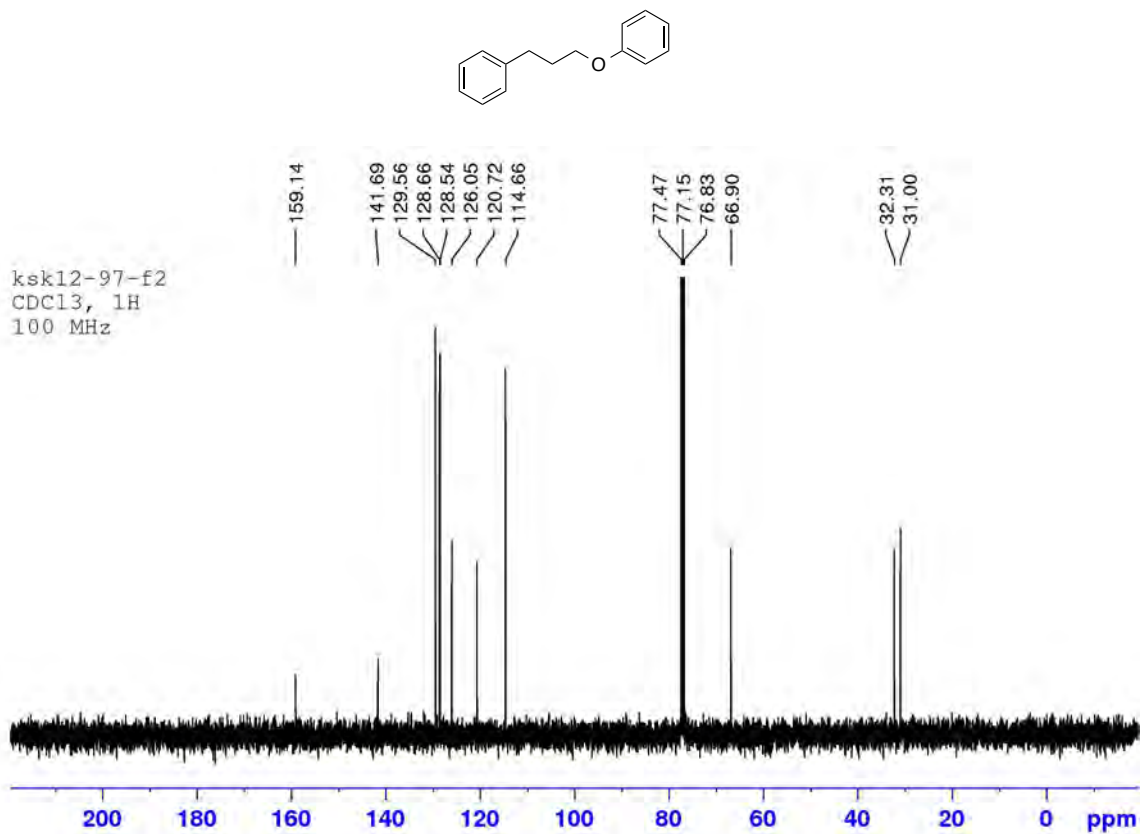

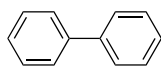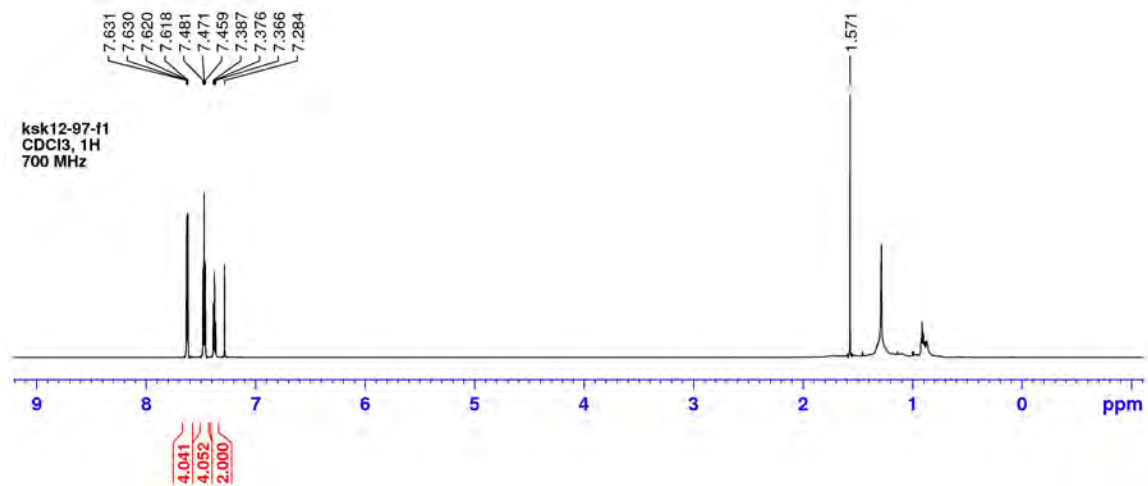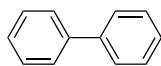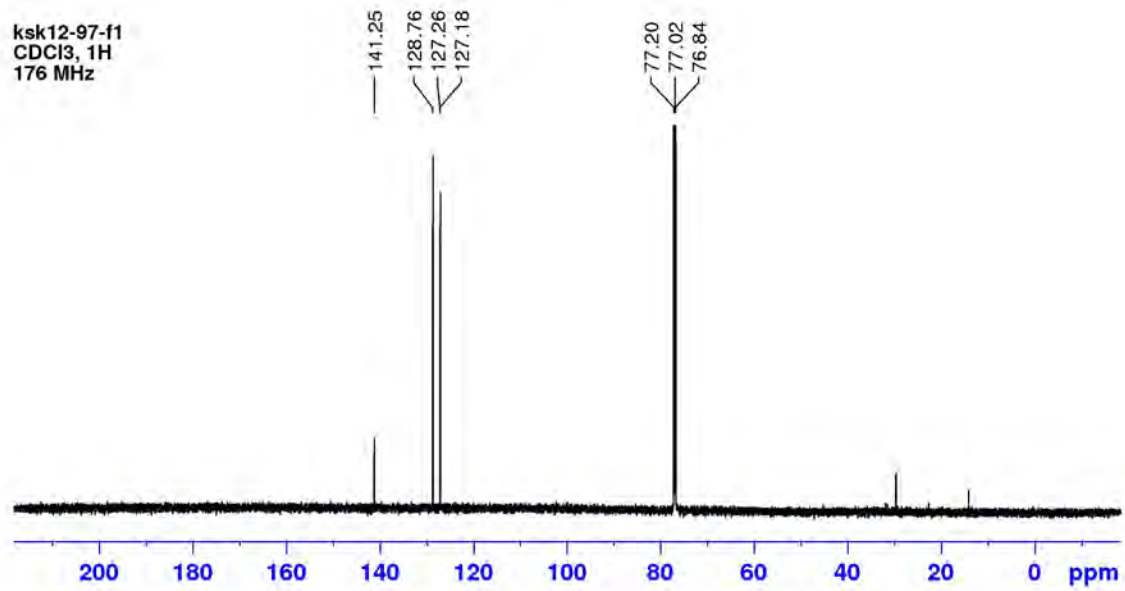

Supplement: jo5b02043_si_001.pdf [file jo5b02043_si_001.pdf]
